# Supplementary material
Source: publisher figshare collection journal article supplement (https://gsapubs.figshare.com/ndownloader/files/23314064)
Supplement: Supplementary file 1 [file 23314064]

## Sheet: SIMS U-Pb 
													conventional concordia columns (Pbc corr.)								TW concordia columns (Pbc corr.)
Sample/	Date	[U]	[Th]	[Pb]	Th/U	Th/U	206Pb/204Pb	207Pb/204Pb	208Pb/204Pb	206Pb/204Pb	f206%		207Pb	±s	206Pb	±s	r	208Pb	±s		238U	±s	207Pb	±s		207Pb	±s	207Pb	±s	206Pb	±s	208Pb	±s	207-corr	±s	Conc.
spot #	run	ppm	ppm	ppm	calc.	meas.	common	common	common	measured			235U	%	238U	%		232Th	%		206Pb	%	206Pb	%		206Pb		235U		238U		232Th		age (Ma)
Sample FR15-21A Wacke & Limestone (Pzw): N 67041´02.20´´ W 151001´51.87´´
n5567-06	28/04/2016	361.853	147.7	27.067	0.37891	0.408177	18.7033	15.6288	38.6305	17242.4	0.11		0.480005	1.68894	0.063958	1.07765	0.638066	0.0180362	2.72993		15.6353	1.07765	0.0544315	1.30045		388.944	28.9329	398.076	5.57723	399.651	4.17742	361.304	9.77334	399.782	4.2401	102.753
n5567-52	29/04/2016	148.943	43.4005	11.3124	0.299448	0.29139	n/a	n/a	n/a	19850.8	{0.09}		0.50162	1.98402	0.0661384	1.25488	0.632491	0.0211892	5.67627		15.1198	1.25488	0.0550072	1.53676		412.517	33.9951	412.799	6.75203	412.849	5.02028	423.807	23.792	412.853	5.10209	100.08
n5567-15	28/04/2016	670.116	350.985	53.8845	0.496357	0.523768	18.7033	15.6288	38.6305	24380.4	0.08		0.504587	1.68588	0.0664476	1.41452	0.839036	0.0196717	4.53376		15.0494	1.41452	0.0550751	0.917246		415.272	20.3674	414.802	5.75713	414.718	5.68404	393.75	17.6712	414.711	5.75714	99.8666
n5567-53	29/04/2016	447.033	140.702	35.501	0.323131	0.314746	18.7033	15.6288	38.6305	9623.49	0.19		0.526245	1.39372	0.0684312	0.963192	0.691096	0.0227698	3.03473		14.6132	0.963192	0.0557741	1.00733		443.386	22.2451	429.315	4.89118	426.697	3.97808	455.067	13.6512	426.474	4.0374	96.236
n5567-37	28/04/2016	84.7947	32.0576	6.95406	0.365035	0.378061	n/a	n/a	n/a	12039.5	{0.16}		0.541604	2.46021	0.0693604	1.20151	0.488375	0.0230707	3.79767		14.4175	1.20151	0.056633	2.14687		477.27	46.7707	439.482	8.81446	432.301	5.02575	461.012	17.3021	431.679	5.12905	90.5778
n5567-77	29/04/2016	141.606	84.2357	12.308	0.56038	0.594861	n/a	n/a	n/a	36406.2	{0.05}		0.543271	1.80298	0.0697094	1.06775	0.592214	0.0223036	2.67936		14.3453	1.06775	0.0565229	1.4528		472.967	31.8228	440.579	6.46512	434.405	4.48708	445.852	11.8117	433.869	4.56446	91.8468
n5567-10	28/04/2016	96.5413	33.5034	7.87451	0.345404	0.347037	n/a	n/a	n/a	9416.99	{0.20}		0.53977	2.46177	0.0697428	1.20124	0.487958	0.0227892	3.58918		14.3384	1.20124	0.0561316	2.1488		457.579	46.9702	438.273	8.80058	434.606	5.05056	455.449	16.1576	434.288	5.15722	94.9795
n5567-22	28/04/2016	273.382	94.819	22.0755	0.364594	0.346837	18.7033	15.6288	38.6305	11988.6	0.16		0.525212	1.92648	0.0696762	1.18544	0.61534	0.0209442	2.9367		14.3521	1.18544	0.05467	1.51857		398.752	33.6774	428.627	6.75838	434.204	4.97963	418.957	12.1732	434.682	5.06451	108.891
n5567-20	28/04/2016	165.352	57.3434	13.3731	0.327222	0.346796	n/a	n/a	n/a	29048.2	{0.06}		0.535352	1.99045	0.0698709	1.08952	0.547375	0.0205384	3.09364		14.3121	1.08952	0.0555702	1.66578		435.238	36.6723	435.356	7.07171	435.378	4.58853	410.92	12.5801	435.38	4.67791	100.032
n5567-79	29/04/2016	258.058	78.5473	20.8642	0.271313	0.304379	n/a	n/a	n/a	60114.7	{0.03}		0.552799	1.55669	0.0700292	1.14277	0.734102	0.0223808	2.88612		14.2797	1.14277	0.0572514	1.05705		501.231	23.1046	446.828	5.64273	436.332	4.82306	447.379	12.766	435.418	4.89058	87.0521
n5567-67	29/04/2016	568.412	509.582	53.3535	0.913508	0.896501	n/a	n/a	n/a	73777.6	{0.03}		0.536714	1.27469	0.069966	1.03471	0.811733	0.0223151	2.29302		14.2927	1.03471	0.0556358	0.744454		437.864	16.4854	436.255	4.53056	435.951	4.36315	446.079	10.1141	435.924	4.4274	99.5629
n5567-24	28/04/2016	106.582	32.7416	8.60817	0.282546	0.307195	n/a	n/a	n/a	>1e6	{0.00}		0.545832	2.31157	0.0701824	1.17081	0.506499	0.0215638	3.71325		14.2486	1.17081	0.0564066	1.99313		468.407	43.5325	442.263	8.32171	437.254	4.95156	431.22	15.8364	436.819	5.05199	93.3493
n5567-48	29/04/2016	696.067	181.871	55.6752	0.24796	0.261283	18.7033	15.6288	38.6305	26149.9	0.07		0.546204	1.26886	0.0701977	1.02531	0.808057	0.0222987	2.65043		14.2455	1.02531	0.0564326	0.747488		469.431	16.4623	442.507	4.56148	437.347	4.33688	445.756	11.6818	436.902	4.39632	93.1653
n5567-50	29/04/2016	419.107	190.898	35.2712	0.518074	0.455489	18.7033	15.6288	38.6305	38095.2	0.05		0.527673	1.40921	0.0700412	1.04112	0.738801	0.022591	2.53682		14.2773	1.04112	0.0546399	0.949698		397.52	21.1486	430.264	4.95448	436.404	4.39462	451.533	11.3244	436.93	4.4665	109.782
n5567-11	28/04/2016	401.856	258.575	35.5365	0.628784	0.643452	n/a	n/a	n/a	51649.9	{0.04}		0.54253	1.48062	0.0702026	1.02884	0.694873	0.0222137	2.50162		14.2445	1.02884	0.0560492	1.06476		454.318	23.4599	440.091	5.30147	437.376	4.35212	444.074	10.9849	437.14	4.42097	96.271
n5567-61	29/04/2016	267.587	88.2305	21.7253	0.342999	0.329726	18.7033	15.6288	38.6305	16451.8	0.11		0.533454	1.77906	0.0701411	1.27772	0.7182	0.0217743	3.04386		14.257	1.27772	0.0551599	1.23794		418.709	27.4114	434.099	6.30369	437.005	5.40093	435.384	13.1065	437.255	5.48371	104.37
n5567-40	28/04/2016	86.2465	25.5722	6.96421	0.289833	0.296501	n/a	n/a	n/a	50491.8	{0.04}		0.542669	2.63754	0.070226	1.28024	0.485392	0.022212	3.62532		14.2397	1.28024	0.0560448	2.30599		454.143	50.3823	440.182	9.46484	437.517	5.4177	444.04	15.9161	437.286	5.53408	96.3391
n5567-65	29/04/2016	211.258	72.5709	17.2549	0.410899	0.343518	n/a	n/a	n/a	46116.3	{0.04}		0.52377	1.66192	0.0701041	1.03711	0.62404	0.0226306	2.69234		14.2645	1.03711	0.0541871	1.29861		378.834	28.9435	427.667	5.81709	436.783	4.38134	452.316	12.0391	437.569	4.46636	115.297
n5567-64	29/04/2016	230.446	119.346	19.6387	0.583235	0.517891	18.7033	15.6288	38.6305	7640.16	0.24		0.525867	1.79922	0.0701656	1.04815	0.582558	0.0217048	2.76503		14.252	1.04815	0.0543564	1.46239		385.846	32.5171	429.063	6.31573	437.153	4.43163	434.01	11.8691	437.846	4.50978	113.297
n5567-60	29/04/2016	273.461	112.144	22.8878	0.392711	0.41009	n/a	n/a	n/a	46817.8	{0.04}		0.547989	1.48549	0.070608	1.00348	0.67552	0.0222257	2.56793		14.1627	1.00348	0.0562881	1.09531		463.751	24.0888	443.678	5.35363	439.818	4.2677	444.312	11.282	439.482	4.3363	94.8391
n5567-80	29/04/2016	338.576	143.386	28.3091	0.461635	0.423496	18.7033	15.6288	38.6305	30396.7	0.06		0.531791	1.38859	0.0705821	0.958687	0.690402	0.0216605	2.49464		14.1679	0.958687	0.0546443	1.00454		397.697	22.3608	432.997	4.90676	439.662	4.07575	433.132	10.6873	440.234	4.14597	110.552
n5567-35	28/04/2016	145.288	38.4949	11.8001	0.245482	0.264955	n/a	n/a	n/a	11478.3	{0.16}		0.560451	1.92851	0.0709844	1.08518	0.562704	0.0232839	3.44938		14.0876	1.08518	0.0572629	1.59422		501.674	34.7162	451.82	7.05744	442.083	4.63826	465.224	15.8578	441.232	4.72175	88.1217
n5567-39	28/04/2016	292.743	86.3646	23.8014	0.290305	0.295019	18.7033	15.6288	38.6305	22169.5	0.08		0.545661	1.56956	0.0708683	1.01387	0.645957	0.0219614	2.90722		14.1107	1.01387	0.0558431	1.19816		446.136	26.4122	442.15	5.64187	441.385	4.32676	439.085	12.6236	441.319	4.39767	98.935
n5567-44	28/04/2016	125.644	56.0395	10.5703	0.501428	0.446019	n/a	n/a	n/a	12780.9	{0.15}		0.529148	2.03639	0.0707253	1.1116	0.545869	0.0214476	3.30377		14.1392	1.1116	0.0542627	1.70623		381.969	37.9014	431.244	7.18049	440.524	4.73505	428.92	14.0164	441.327	4.83677	115.33
n5567-58	29/04/2016	193.594	74.3748	16.1183	0.407115	0.38418	n/a	n/a	n/a	>1e6	{0.00}		0.538641	2.15982	0.0708435	1.065	0.493097	0.0221468	3.17579		14.1156	1.065	0.055144	1.87899		418.066	41.4289	437.528	7.70651	441.236	4.54356	442.752	13.9032	441.558	4.64518	105.542
n5567-27	28/04/2016	1405.88	410.713	114.092	0.307337	0.292139	18.7033	15.6288	38.6305	27235.6	0.07		0.537913	1.09285	0.0709069	0.926331	0.847626	0.0217197	2.29497		14.103	0.926331	0.0550202	0.579861		413.044	12.9108	437.047	3.88869	441.617	3.95507	434.303	9.8584	442.011	4.01563	106.918
n5567-55	29/04/2016	455.769	198.274	38.5943	0.43075	0.435032	18.7033	15.6288	38.6305	32535.7	0.06		0.547376	1.43761	0.0711072	1.12774	0.784456	0.022073	2.46838		14.0633	1.12774	0.0558304	0.89158		445.631	19.697	443.276	5.17686	442.823	4.82803	441.293	10.7719	442.783	4.89932	99.3697
n5567-04	28/04/2016	1018.97	386.704	84.3431	0.406544	0.379503	18.7033	15.6288	38.6305	14634.2	0.13		0.532919	1.27668	0.0710089	1.02733	0.804694	0.0208129	2.43169		14.0827	1.02733	0.0544311	0.757951		388.928	16.9264	433.745	4.51667	442.231	4.39236	416.357	10.0185	442.961	4.46268	113.705
n5567-81	29/04/2016	222.433	114.414	19.3217	0.533288	0.514376	18.7033	15.6288	38.6305	23081.9	0.08		0.546338	1.72018	0.0712402	1.03672	0.602682	0.0226728	2.56919		14.037	1.03672	0.0556205	1.37267		437.252	30.2695	442.595	6.18991	443.623	4.44599	453.149	11.5094	443.712	4.52304	101.457
n5567-69	29/04/2016	261.45	103.767	22.0401	0.401886	0.396889	n/a	n/a	n/a	42440.5	{0.04}		0.549542	1.47259	0.0712967	0.993559	0.6747	0.0227197	2.7817		14.0259	0.993559	0.0559024	1.08691		448.493	23.9683	444.697	5.31676	443.963	4.26398	454.077	12.4864	443.899	4.33553	98.99
n5567-51	29/04/2016	240.508	73.865	19.7486	0.325417	0.30712	18.7033	15.6288	38.6305	15318.4	0.12		0.542879	1.77388	0.0713443	1.049	0.591361	0.0222392	3.16396		14.0165	1.049	0.0551878	1.43047		419.84	31.6266	440.321	6.35746	444.249	4.5048	444.578	13.9079	444.589	4.58603	105.814
n5567-25	28/04/2016	604.075	382.932	53.7514	0.721868	0.633915	18.7033	15.6288	38.6305	38816.7	0.05		0.533673	1.31994	0.0712674	0.986734	0.747559	0.0218379	2.45419		14.0317	0.986734	0.0543104	0.876699		383.942	19.5793	434.244	4.6744	443.787	4.23306	436.641	10.5983	444.609	4.3066	115.587
n5567-73	29/04/2016	382.036	176.276	32.7133	0.47126	0.461413	n/a	n/a	n/a	83133.6	{0.02}		0.547058	1.36426	0.0714168	1.02515	0.751432	0.0222023	2.67614		14.0023	1.02515	0.0555561	0.900154		434.672	19.923	443.068	4.91026	444.686	4.40652	443.848	11.7451	444.827	4.47754	102.304
n5567-49	29/04/2016	241.555	69.5457	19.8202	0.305076	0.287908	18.7033	15.6288	38.6305	13647.8	0.14		0.545006	1.7593	0.0717644	1.14297	0.649674	0.0220058	2.96884		13.9345	1.14297	0.0550796	1.33744		415.458	29.6113	441.72	6.3211	446.777	4.93549	439.963	12.9165	447.214	5.01917	107.538
n5567-78	29/04/2016	461.566	178.27	39.0026	0.418332	0.386228	18.7033	15.6288	38.6305	17922.3	0.1		0.545803	1.34396	0.0718255	1.02657	0.763837	0.0225683	2.41886		13.9226	1.02657	0.0551133	0.867404		416.821	19.2621	442.244	4.82982	447.144	4.43618	451.085	10.7874	447.569	4.50733	107.275
n5567-38	28/04/2016	211.529	86.3648	17.8598	0.440373	0.408287	18.7033	15.6288	38.6305	11269.3	0.17		0.540585	1.94851	0.0717857	1.14358	0.586901	0.0213707	3.06112		13.9303	1.14358	0.0546166	1.57762		396.561	34.9863	438.81	6.96625	446.905	4.93949	427.398	12.9417	447.605	5.02976	112.695
n5567-46	29/04/2016	296.325	101.626	24.776	0.389652	0.342954	18.7033	15.6288	38.6305	33349.9	0.06		0.542357	1.50606	0.0718556	0.981923	0.651981	0.022807	2.59805		13.9168	0.981923	0.0547424	1.14195		401.716	25.3775	439.978	5.39169	447.325	4.24486	455.803	11.7061	447.961	4.32213	111.354
n5567-07	28/04/2016	187.378	87.636	16.2885	0.433824	0.467697	n/a	n/a	n/a	23577.2	{0.08}		0.566286	2.07701	0.0723222	1.41582	0.681662	0.0224488	2.96018		13.827	1.41582	0.0567888	1.51968		483.342	33.2135	455.61	7.65367	450.131	6.15858	448.721	13.1323	449.65	6.25707	93.129
n5567-41	28/04/2016	162.103	44.1386	13.3709	0.26361	0.272287	18.7033	15.6288	38.6305	17306.9	0.11		0.560816	1.91926	0.0723245	1.0892	0.567512	0.022374	3.24378		13.8266	1.0892	0.0562386	1.58025		461.799	34.6508	452.058	7.02643	450.145	4.73747	447.244	14.3432	449.978	4.82375	97.4764
n5567-05	28/04/2016	225.549	55.1629	18.5262	0.248647	0.244572	n/a	n/a	n/a	28310.9	{0.07}		0.560163	1.99765	0.0723848	1.03758	0.519402	0.0232675	3.01838		13.8151	1.03758	0.0561262	1.70705		457.364	37.4273	451.632	7.30895	450.507	4.51637	464.899	13.8675	450.409	4.61115	98.5008
n5567-28	28/04/2016	275.751	110.77	23.4836	0.431275	0.401702	18.7033	15.6288	38.6305	18590.5	0.1		0.548302	1.68607	0.0722927	1.06183	0.629765	0.022138	3.09781		13.8327	1.06183	0.0550077	1.30972		412.537	29.0177	443.883	6.08093	449.954	4.61646	442.578	13.5567	450.48	4.69957	109.07
n5567-70	29/04/2016	450.435	123.537	37.1855	0.310087	0.274262	18.7033	15.6288	38.6305	34022.1	0.05		0.546744	1.31601	0.072297	0.979539	0.744326	0.0229426	2.53978		13.8318	0.979539	0.0548482	0.878852		406.042	19.5514	442.861	4.73441	449.979	4.25881	458.482	11.5101	450.596	4.33155	110.821
n5567-71	29/04/2016	254.706	105.63	21.8573	0.437957	0.414712	18.7033	15.6288	38.6305	18923.9	0.1		0.553256	1.8105	0.0723988	0.982662	0.542757	0.0226724	2.57223		13.8124	0.982662	0.0554234	1.52062		429.345	33.5439	447.127	6.56926	450.592	4.27801	453.142	11.5229	450.893	4.3635	104.949
n5567-21	28/04/2016	523.945	90.893	42.2358	0.172224	0.173478	18.7033	15.6288	38.6305	40918.3	0.05		0.563314	1.35605	0.0725086	0.977457	0.720811	0.0231552	2.79482		13.7915	0.977457	0.0563456	0.939923		466.011	20.6853	453.681	4.97364	451.252	4.26136	462.681	12.7802	451.04	4.32806	96.8328
n5567-43	28/04/2016	239.398	90.7379	20.3846	0.41355	0.379025	n/a	n/a	n/a	23918.5	{0.08}		0.551499	1.57675	0.0724564	1.00504	0.637412	0.0229357	2.62455		13.8014	1.00504	0.0552035	1.21493		420.476	26.8979	445.978	5.70699	450.938	4.37872	458.346	11.8906	451.372	4.46121	107.245
n5567-68	29/04/2016	205.652	100.424	17.9637	0.469615	0.48832	n/a	n/a	n/a	34253.5	{0.05}		0.561261	2.31855	0.0725443	1.55053	0.668749	0.0219833	3.02315		13.7847	1.55053	0.0561126	1.72381		456.827	37.7941	452.347	8.49869	451.466	6.76415	439.517	13.1396	451.389	6.87908	98.8264
n5567-62	29/04/2016	205.012	64.1402	17.1332	0.307372	0.31286	n/a	n/a	n/a	24408.4	{0.08}		0.560083	1.61076	0.0725659	1.05392	0.654296	0.0221931	2.88643		13.7806	1.05392	0.0559781	1.21812		451.502	26.8237	451.58	5.88878	451.596	4.5982	443.667	12.6627	451.597	4.67907	100.021
n5567-63	29/04/2016	329.161	92.8885	27.369	0.301415	0.282198	n/a	n/a	n/a	38799.7	{0.05}		0.555339	1.70469	0.0726293	1.01775	0.597026	0.0230006	2.58319		13.7685	1.01775	0.0554555	1.36754		430.634	30.1919	448.488	6.19918	451.977	4.44396	459.627	11.7357	452.283	4.53051	104.956
n5567-42	29/04/2016	554.53	156.666	46.1705	0.286785	0.28252	n/a	n/a	n/a	58741.7	{0.03}		0.561062	1.27584	0.0727295	1.00742	0.78961	0.0228728	3.14003		13.7496	1.00742	0.0559499	0.782867		450.38	17.294	452.217	4.66675	452.579	4.4045	457.103	14.1871	452.611	4.47397	100.488
n5567-16a	28/04/2016	216.52	118.586	19.3172	0.642121	0.547691	n/a	n/a	n/a	29750.4	{0.06}		0.546211	1.77329	0.0727068	1.08599	0.612413	0.022912	2.64304		13.7539	1.08599	0.0544859	1.40186		391.189	31.155	442.512	6.38067	452.443	4.74676	457.878	11.9623	453.311	4.84376	115.658
n5567-17	28/04/2016	415.618	117.563	34.6841	0.294679	0.282862	n/a	n/a	n/a	64385.7	{0.03}		0.55848	1.43078	0.0730687	1.01604	0.710131	0.0223879	2.60961		13.6857	1.01604	0.0554338	1.00737		429.762	22.2985	450.537	5.21944	454.617	4.46152	447.518	11.5468	454.976	4.53993	105.784
n5567-36	28/04/2016	298.811	67.7925	24.6033	0.252366	0.226874	18.7033	15.6288	38.6305	22307.7	0.08		0.552996	1.58121	0.0732579	0.983801	0.622182	0.0223415	2.97282		13.6504	0.983801	0.0547477	1.23789		401.936	27.4903	446.957	5.73319	455.753	4.33033	446.601	13.1268	456.519	4.41251	113.39
n5567-12	28/04/2016	468.586	173.995	40.3545	0.3797	0.37132	n/a	n/a	n/a	38965.5	{0.05}		0.566815	1.37128	0.0734226	0.987125	0.719858	0.0231233	2.4634		13.6198	0.987125	0.0559899	0.951832		451.968	20.9964	455.952	5.04961	456.743	4.35408	462.052	11.25	456.813	4.42765	101.057
n5567-56	29/04/2016	443.059	166.433	38.2602	0.386871	0.375646	18.7033	15.6288	38.6305	33120.1	0.06		0.566373	1.33933	0.0736914	0.998761	0.745717	0.0227756	2.43952		13.5701	0.998761	0.0557423	0.892346		442.117	19.7258	455.666	4.92922	458.357	4.42044	455.181	10.9772	458.592	4.49345	103.673
n5567-13	28/04/2016	172.328	46.875	14.4731	0.301729	0.27201	18.7033	15.6288	38.6305	12911.6	0.14		0.558117	2.10482	0.0738273	1.1443	0.543658	0.0224641	4.03739		13.5451	1.1443	0.0548286	1.76659		405.239	39.0672	450.3	7.68443	459.173	5.07355	449.025	17.9211	459.948	5.17637	113.309
n5567-01	28/04/2016	680.51	356.396	61.8645	0.536669	0.523719	18.7033	15.6288	38.6305	12575.3	0.15		0.575904	1.48764	0.0745815	1.04253	0.700799	0.0232008	2.67619		13.4081	1.04253	0.0560038	1.06122		452.52	23.3896	461.826	5.53516	463.699	4.66614	463.582	12.2614	463.864	4.7467	102.47
n5567-29	28/04/2016	114.79	30.1628	9.753	0.283395	0.262765	n/a	n/a	n/a	14348.7	{0.13}		0.570117	2.20715	0.0748489	1.20276	0.544938	0.0227582	3.9738		13.3602	1.20276	0.055243	1.85065		422.071	40.7835	458.09	8.17034	465.303	5.40153	454.838	17.8646	465.942	5.52108	110.243
n5567-54	29/04/2016	170.064	54.8976	14.8298	0.302546	0.322806	n/a	n/a	n/a	31412.3	{0.06}		0.595511	1.7103	0.0751612	1.08075	0.631907	0.02392	3.02527		13.3047	1.08075	0.0574639	1.32556		509.381	28.8805	474.381	6.50252	467.175	4.87223	477.786	14.2798	466.532	4.95822	91.7144
n5567-32	28/04/2016	348.168	186.222	32.0715	0.610309	0.534862	18.7033	15.6288	38.6305	17538.7	0.11		0.571751	1.52104	0.0753741	1.00849	0.663025	0.0235465	2.45884		13.2672	1.00849	0.0550153	1.13865		412.847	25.2558	459.146	5.63377	468.452	4.55833	470.41	11.4298	469.271	4.64442	113.469
n5567-72	29/04/2016	187.187	71.1977	16.7023	0.402083	0.380357	n/a	n/a	n/a	42090.9	{0.04}		0.5863	1.64908	0.0757905	1.07476	0.651733	0.0241493	2.68006		13.1943	1.07476	0.0561053	1.25074		456.54	27.5121	468.502	6.20774	470.947	4.88294	482.31	12.7691	471.166	4.97528	103.156
n5567-66	29/04/2016	126.639	39.0166	11.1214	0.30323	0.308093	n/a	n/a	n/a	34765.6	{0.05}		0.596649	1.90509	0.0761171	1.16473	0.61138	0.0239394	3.04682		13.1377	1.16473	0.0568506	1.50757		485.744	32.9379	475.105	7.25446	472.904	5.31308	478.167	14.3928	472.707	5.4143	97.3567
n5567-74	29/04/2016	117.59	33.9497	10.3126	0.270171	0.288712	n/a	n/a	n/a	16037.9	{0.12}		0.606179	1.91095	0.0763424	1.11634	0.584177	0.0241085	3.13186		13.0989	1.11634	0.0575882	1.55098		514.131	33.7131	481.147	7.3495	474.254	5.10623	481.505	14.8964	473.634	5.20421	92.2437
n5567-23	28/04/2016	197.146	77.2681	17.7802	0.436255	0.391934	n/a	n/a	n/a	38801.2	{0.05}		0.585746	1.81336	0.0764369	1.12001	0.617643	0.0242465	2.85373		13.0827	1.12001	0.0555783	1.42613		435.561	31.446	468.148	6.82414	474.82	5.12892	484.23	13.6498	475.416	5.23442	109.014
n5567-08	28/04/2016	652.541	392.103	62.4472	0.634529	0.600887	18.7033	15.6288	38.6305	8943.9	0.21		0.594592	1.47392	0.0772411	1.12249	0.761569	0.0235401	2.40831		12.9465	1.12249	0.0558302	0.955222		445.622	21.0938	473.796	5.59588	479.634	5.19052	470.284	11.1921	480.155	5.27769	107.633
n5567-33	28/04/2016	229.836	114.43	21.7789	0.530466	0.497876	n/a	n/a	n/a	44910.1	{0.04}		0.605653	1.61872	0.0781057	1.07265	0.662657	0.0246249	2.56195		12.8032	1.07265	0.0562393	1.21229		461.829	26.649	480.815	6.21873	484.806	5.0115	491.695	12.4411	485.166	5.10976	104.975
n5567-26	28/04/2016	403.995	199.036	38.1146	0.501387	0.49267	n/a	n/a	n/a	203142	{0.01}		0.607841	1.5391	0.0782458	1.17521	0.763567	0.023728	2.53951		12.7802	1.17521	0.0563414	0.993844		465.847	21.8645	482.197	5.92531	485.643	5.49999	473.994	11.8936	485.955	5.59892	104.249
n5567-34	28/04/2016	963.741	551.637	95.1108	0.583107	0.572391	18.7033	15.6288	38.6305	78741.7	0.02		0.626692	1.13093	0.0800103	0.964715	0.85303	0.0246925	2.24374		12.4984	0.964715	0.0568077	0.590188		484.074	12.9794	494.033	4.43365	496.184	4.60883	493.027	10.9255	496.379	4.68777	102.502
n5567-02	28/04/2016	500.902	289.862	49.383	0.614525	0.578681	18.7033	15.6288	38.6305	29514.2	0.06		0.619197	1.39174	0.0801578	1.02678	0.737763	0.0240884	2.42766		12.4754	1.02678	0.056025	0.93951		453.359	20.7214	489.344	5.41847	497.065	4.91381	481.109	11.5385	497.763	5.00767	109.64
n5567-16b	28/04/2016	514.288	340.835	51.8528	0.722045	0.662731	18.7033	15.6288	38.6305	19353.8	0.1		0.617737	1.42602	0.0802007	1.04877	0.735452	0.0243589	2.38681		12.4687	1.04877	0.055863	0.96624		446.926	21.3307	488.428	5.54418	497.321	5.0216	486.448	11.4687	498.125	5.11761	111.276
n5567-31	28/04/2016	425.452	349.391	45.092	0.93167	0.821222	n/a	n/a	n/a	327248	{0.01}		0.621359	1.34078	0.0807434	0.981986	0.732399	0.0252504	2.32337		12.3849	0.981986	0.0558128	0.912904		444.93	20.1676	490.699	5.23081	500.559	4.73116	504.029	11.5623	501.459	4.82805	112.503
n5567-47	29/04/2016	806	449.132	81.1271	0.599958	0.557236	18.7033	15.6288	38.6305	46675.6	0.04		0.637831	1.15245	0.081734	0.945891	0.820763	0.0256516	2.26022		12.2348	0.945891	0.0565981	0.658362		475.909	14.4922	500.963	4.56738	506.464	4.60889	511.937	11.4224	506.967	4.6938	106.421
n5567-14	28/04/2016	872.905	626.607	92.5714	0.774775	0.71784	18.7033	15.6288	38.6305	61285	0.03		0.646911	1.36755	0.0828654	0.982747	0.718619	0.0257615	2.25892		12.0678	0.982747	0.0566201	0.951		476.766	20.8889	506.576	5.46911	513.203	4.84978	514.103	11.4635	513.812	4.94758	107.643
n5567-75	29/04/2016	130.448	113.983	55.5032	0.874353	0.873785	n/a	n/a	n/a	101237	{0.02}		4.63697	1.23823	0.312262	1.0401	0.839992	0.0910851	2.34221		3.20244	1.0401	0.1077	0.671863		1760.86	12.2322	1755.95	10.3954	1751.83	15.9746	1761.95	39.4826	>1200		99.4872
Sample FR15-24 Calcareous Chloritic Wacke (Dbcw): N 67034´14.84´´ W 151001´45.17´´
n5566-40	28/04/2016	838.649	36.0219	98.0012	0.0441343	0.0429523	n/a	n/a	n/a	242157	{0.01}		0.923656	0.907823	0.108689	0.833719	0.918371	0.0341822	2.35804		9.20058	0.833719	0.0616346	0.359244		661.453	7.68009	664.292	4.4357	665.129	5.27097	679.353	15.747	665.218	5.40074	100.556
n5566-57	27/04/2016	345.484	117.633	51.4385	0.379724	0.340487	18.7033	15.6288	38.6305	164.065	11.4		1.11537	6.35176	0.126709	1.46155	0.230101	0.0413823	9.64451		7.89212	1.46155	0.0638426	6.18132		736.42	125.687	760.754	34.5886	769.062	10.6043	819.584	77.3157	770.025	16.0761	104.433
n5566-45	27/04/2016	250.861	95.4604	37.7894	0.342783	0.380531	18.7033	15.6288	38.6305	210.604	8.88		1.16782	6.77341	0.128171	1.21668	0.179626	0.0367852	10.7973		7.80207	1.21668	0.0660822	6.66324		808.979	133.547	785.624	37.743	777.423	8.91684	730.161	77.2831	776.457	13.3128	96.0993
n5569-03	30/04/2016	490.54	271.491	93.0085	0.542734	0.553452	18.7033	15.6288	38.6305	45683	0.04		1.48879	1.021	0.152722	0.92588	0.906837	0.0471305	2.54742		6.54784	0.92588	0.0707018	0.430333		948.803	8.7834	925.823	6.22057	916.204	7.91255	930.845	23.1615	914.913	8.21547	96.5642
n5566-16	27/04/2016	116.954	68.8246	22.6175	0.573305	0.588478	18.7033	15.6288	38.6305	3099.14	0.6		1.50278	1.43349	0.155441	0.941581	0.656845	0.0459638	3.108		6.4333	0.941581	0.0701178	1.08089		931.805	22.0258	931.515	8.77756	931.392	8.17089	908.312	27.5866	931.375	8.53735	99.9557
n5566-5	27/04/2016	507.77	281.07	99.9335	0.568033	0.553539	18.7033	15.6288	38.6305	32615.6	0.06		1.54116	0.917799	0.158476	0.8308	0.90521	0.049057	2.02635		6.31011	0.8308	0.0705315	0.390032		943.866	7.969	946.967	5.66767	948.302	7.33058	967.997	19.1437	948.485	7.63829	100.47
n5566-3	27/04/2016	853.896	48.4868	148.429	0.0453339	0.056783	18.7033	15.6288	38.6305	67215	0.03		1.56548	0.891933	0.160283	0.845031	0.947416	0.038532	2.54692		6.23895	0.845031	0.0708365	0.285423		952.698	5.82773	956.637	5.54147	958.351	7.52955	764.187	19.0908	958.589	7.84807	100.593
n5566-4	27/04/2016	433.941	39.9425	76.7358	0.0904954	0.0920461	18.7033	15.6288	38.6305	69399.8	0.03		1.58301	0.933666	0.160917	0.844672	0.904684	0.0481998	3.24674		6.21438	0.844672	0.0713478	0.397819		967.396	8.09832	963.554	5.82673	961.871	7.55199	951.475	30.1536	961.636	7.87347	99.4289
n5566-26	27/04/2016	154.231	52.1004	29.1573	0.324645	0.337808	18.7033	15.6288	38.6305	4486.75	0.42		1.60223	1.22598	0.161148	0.893043	0.728432	0.0481966	2.48548		6.20547	0.893043	0.0721104	0.839941		989.058	16.9929	971.08	7.69372	963.154	7.99461	951.413	23.086	962.043	8.36187	97.3809
n5569-12	30/04/2016	359.804	76.2861	65.9477	0.217997	0.212021	18.7033	15.6288	38.6305	40471.2	0.05		1.56494	1.09855	0.161616	0.977056	0.889404	0.0486815	2.63359		6.18749	0.977056	0.0702279	0.502171		935.023	10.2667	956.423	6.82857	965.753	8.76911	960.761	24.6955	967.054	9.15884	103.287
n5566-37	27/04/2016	219.015	90.4041	42.7197	0.412069	0.412775	n/a	n/a	n/a	93520.3	{0.02}		1.6139	1.00696	0.162815	0.848333	0.842466	0.0497444	2.53183		6.14193	0.848333	0.0718918	0.542501		982.879	11.007	975.622	6.33263	972.402	7.66173	981.237	24.2353	971.945	8.00184	98.9341
n5566-8	27/04/2016	133.777	23.7682	24.454	0.174607	0.17767	18.7033	15.6288	38.6305	34184.9	0.05		1.59703	1.1357	0.162693	0.871423	0.767301	0.0479557	2.70037		6.14653	0.871423	0.0711939	0.72831		962.986	14.8041	969.051	7.11625	971.728	7.86533	946.768	24.9613	972.104	8.22606	100.908
n5566-44	27/04/2016	153.045	114.926	32.4301	0.755741	0.75093	n/a	n/a	n/a	64167.5	{0.03}		1.60841	1.1117	0.162881	0.862395	0.775746	0.0497435	2.10608		6.13946	0.862395	0.0716186	0.701532		975.122	14.2358	973.489	6.98442	972.766	7.7915	981.219	20.1616	972.663	8.14924	99.7584
n5569-15	30/04/2016	313.967	66.2878	58.0317	0.221756	0.21113	18.7033	15.6288	38.6305	60269	0.03		1.58095	1.0044	0.1628	0.856008	0.852255	0.0500516	2.68178		6.1425	0.856008	0.0704306	0.525431		940.934	10.7307	962.743	6.26637	972.32	7.73048	987.151	25.8206	973.663	8.08424	103.336
n5569-01	30/04/2016	277.3	42.2373	50.6152	0.150223	0.152316	18.7033	15.6288	38.6305	56893.9	0.03		1.61512	1.04594	0.163371	0.892489	0.85329	0.0488684	3.10833		6.12104	0.892489	0.0717014	0.545391		977.478	11.0746	976.097	6.58045	975.483	8.08445	964.363	29.2506	975.397	8.44262	99.796
n5566-12	27/04/2016	507.834	40.6592	90.8941	0.0793324	0.0800639	18.7033	15.6288	38.6305	69971.8	0.03		1.6056	0.924906	0.163462	0.847605	0.916422	0.0484178	2.38666		6.11761	0.847605	0.0712391	0.37016		964.282	7.54023	972.395	5.80361	975.99	7.68132	955.677	22.2657	976.497	8.02104	101.214
n5566-42	28/04/2016	253.748	95.6523	49.1562	0.388228	0.376957	18.7033	15.6288	38.6305	55263.2	0.03		1.59525	1.05074	0.163441	0.900277	0.856801	0.0496331	2.14721		6.11842	0.900277	0.070789	0.541812		951.328	11.0464	968.353	6.57933	975.871	8.15804	979.094	20.5117	976.93	8.52937	102.58
n5566-21	27/04/2016	187.55	84.3812	37.1174	0.460205	0.449914	n/a	n/a	n/a	60585	{0.03}		1.61038	1.06099	0.163651	0.873266	0.823066	0.0501785	2.25784		6.11055	0.873266	0.0713685	0.602586		967.987	12.2492	974.255	6.66794	977.037	7.92188	989.594	21.7935	977.433	8.28549	100.935
n5566-20	27/04/2016	247.078	58.7003	46.5786	0.241725	0.237578	n/a	n/a	n/a	150976	{0.01}		1.62863	0.998678	0.164726	0.852893	0.854022	0.0504213	2.20888		6.07067	0.852893	0.0717062	0.51955		977.615	10.5514	981.329	6.30224	982.99	7.78062	994.267	21.4194	983.228	8.13626	100.55
n5569-06	30/04/2016	285.058	38.9597	52.3072	0.141148	0.136673	18.7033	15.6288	38.6305	28223	0.07		1.60099	1.0291	0.165189	0.859317	0.835018	0.048998	2.79909		6.05369	0.859317	0.0702923	0.566233		936.905	11.5682	970.597	6.45233	985.547	7.85814	966.86	26.4089	987.663	8.23348	105.192
n5569-07	30/04/2016	277.828	48.4108	51.6043	0.176562	0.174248	18.7033	15.6288	38.6305	68291.9	0.03		1.61843	1.03393	0.165454	0.871878	0.843267	0.049067	2.75225		6.04397	0.871878	0.0709439	0.555732		955.796	11.3214	977.382	6.50976	987.016	7.98409	968.19	26.0021	988.385	8.35941	103.266
n5566-54	27/04/2016	402.136	351.293	89.4491	0.919356	0.873568	18.7033	15.6288	38.6305	44654.8	0.04		1.6236	0.947086	0.166365	0.85232	0.89994	0.050705	2.0898		6.01087	0.85232	0.0707807	0.412943		951.086	8.42645	979.384	5.96865	992.053	7.84175	999.725	20.3737	993.86	8.21191	104.307
n5569-05	30/04/2016	141.092	77.6637	29.054	0.560956	0.550448	n/a	n/a	n/a	166491	{0.01}		1.63885	1.23941	0.166504	0.987079	0.796407	0.0500194	2.61771		6.00587	0.987079	0.071386	0.749549		968.488	15.2209	985.269	7.84599	992.818	9.08895	986.532	25.1887	993.907	9.52793	102.512
n5569-11	30/04/2016	320.805	45.5301	60.1392	0.145837	0.141925	18.7033	15.6288	38.6305	28831.6	0.06		1.67652	1.00419	0.167927	0.855801	0.852234	0.0519806	4.12096		5.95498	0.855801	0.0724083	0.52535		997.439	10.6366	999.663	6.40695	1000.68	7.93711	1024.25	41.1154	1000.82	8.30563	100.325
n5566-53	27/04/2016	146.14	49.2486	29.8628	0.332258	0.336995	n/a	n/a	n/a	53384.9	{0.04}		1.78429	1.10393	0.173572	0.905807	0.820533	0.0529098	2.21878		5.7613	0.905807	0.0745564	0.631003		1056.57	12.6535	1039.75	7.20877	1031.76	8.642	1042.09	22.5233	1030.56	9.06431	97.6522
n5566-39	28/04/2016	323.245	164.8	69.723	0.525358	0.509829	18.7033	15.6288	38.6305	93583.8	0.02		1.78312	0.941673	0.175087	0.840764	0.89284	0.0542865	2.07339		5.71143	0.840764	0.0738626	0.424104		1037.72	8.54011	1039.32	6.14458	1040.08	8.0807	1068.5	21.5673	1040.2	8.47751	100.228
n5569-09	30/04/2016	420.958	370.147	99.5396	0.922598	0.879295	18.7033	15.6288	38.6305	62801.8	0.03		1.76991	0.958972	0.17655	0.856304	0.89294	0.0535348	2.4026		5.66411	0.856304	0.0727079	0.431707		1005.82	8.73482	1034.49	6.24102	1048.1	8.28864	1054.09	24.6614	1050.15	8.71963	104.203
n5566-52	27/04/2016	385.861	159.727	83.2098	0.415832	0.413949	18.7033	15.6288	38.6305	86506.4	0.02		1.85911	0.951116	0.179528	0.83974	0.882899	0.0546815	2.15415		5.57016	0.83974	0.0751056	0.446608		1071.33	8.9467	1066.67	6.29919	1064.4	8.24451	1076.08	22.5615	1064.05	8.66371	99.3528
n5566-55	27/04/2016	299.664	141.132	65.9288	0.478931	0.470966	18.7033	15.6288	38.6305	83840.8	0.02		1.86883	0.978666	0.180353	0.877456	0.896584	0.0554215	2.36435		5.54468	0.877456	0.0751528	0.433425		1072.59	8.68172	1070.12	6.49408	1068.9	8.64861	1090.25	25.0789	1068.72	9.09068	99.6561
n5569-02	30/04/2016	83.8059	43.0923	18.7546	0.531147	0.514192	n/a	n/a	n/a	31754	{0.06}		1.86253	1.42418	0.182036	0.947093	0.665012	0.0549239	2.65825		5.49341	0.947093	0.0742069	1.06362		1047.1	21.2994	1067.89	9.45294	1078.09	9.40925	1080.72	27.9544	1079.68	9.96817	102.959
n5566-1	27/04/2016	280.221	67.9213	59.4189	0.237366	0.242384	18.7033	15.6288	38.6305	53710.3	0.03		1.94268	0.962438	0.184637	0.853866	0.887191	0.0549372	2.16978		5.41603	0.853866	0.07631	0.444071		1103.22	8.8539	1095.92	6.47209	1092.26	8.58481	1080.97	22.8257	1091.68	9.03944	99.0066
n5566-41	28/04/2016	283.208	119.218	65.4945	0.422513	0.420957	18.7033	15.6288	38.6305	119957	0.02		2.03654	0.948953	0.192558	0.848522	0.894166	0.0568485	2.07046		5.19323	0.848522	0.0767061	0.42488		1113.56	8.45935	1127.81	6.48298	1135.22	8.83815	1117.56	22.4981	1136.43	9.35427	101.945
n5566-51	27/04/2016	237.605	103.328	55.8847	0.444021	0.434871	n/a	n/a	n/a	119778	{0.02}		2.08117	0.961093	0.194391	0.845835	0.880076	0.0591299	2.07644		5.14426	0.845835	0.077648	0.456359		1137.88	9.05175	1142.62	6.61304	1145.12	8.88041	1161.15	23.4174	1145.54	9.40611	100.636
n5566-48	27/04/2016	82.6032	37.0503	19.6051	0.451708	0.448534	18.7033	15.6288	38.6305	9515.71	0.2		2.11005	1.25834	0.195498	0.895761	0.711859	0.0591707	2.46867		5.11515	0.895761	0.07828	0.883762		1153.99	17.44	1152.09	8.70592	1151.09	9.44977	1161.93	27.856	1150.92	10.0328	99.7485
n5566-23	27/04/2016	252.711	119.431	61.6986	0.482179	0.472598	18.7033	15.6288	38.6305	58196	0.03		2.17176	0.962126	0.199682	0.847872	0.881248	0.0607566	2.10472		5.00797	0.847872	0.078881	0.454753		1169.15	8.97881	1172.04	6.71132	1173.61	9.1039	1192.17	24.3515	1173.88	9.66046	100.382
n5566-27	27/04/2016	261.391	120.264	63.8398	0.499249	0.460092	18.7033	15.6288	38.6305	47577.6	0.04		2.14145	1.10099	0.199705	1.00549	0.913261	0.063019	2.35287		5.00738	1.00549	0.077771	0.448515		1141.03	8.89251	1162.29	7.64937	1173.74	10.7988	1235.23	28.1734	1175.68	11.4691	102.866
n5566-46	27/04/2016	197.172	77.2425	49.4965	0.388651	0.391752	n/a	n/a	n/a	104188	{0.02}		2.33472	1.02031	0.210087	0.885409	0.86778	0.0612935	2.12257		4.75993	0.885409	0.0805999	0.507043		1211.71	9.94637	1222.92	7.2794	1229.28	9.91697	1202.39	24.7622	>1200		101.451
n5566-31	27/04/2016	513.833	191.169	131.364	0.391413	0.372046	18.7033	15.6288	38.6305	95888.7	0.02		2.39387	0.886426	0.21381	0.834301	0.941197	0.0658089	2.14987		4.67705	0.834301	0.0812029	0.299487		1226.36	5.87027	1240.77	6.36853	1249.08	9.48063	1288.21	26.8129	>1200		101.853
n5566-2	27/04/2016	390.242	128.877	98.6809	0.335228	0.330248	18.7033	15.6288	38.6305	103413	0.02		2.41337	0.923981	0.214177	0.86	0.930755	0.0641661	2.09208		4.66904	0.86	0.0817243	0.337847		1238.92	6.60862	1246.59	6.65512	1251.03	9.78671	1257.03	25.4809	>1200		100.978
n5566-34	27/04/2016	240.919	91.5864	62.1776	0.386304	0.380155	18.7033	15.6288	38.6305	52779.8	0.04		2.44527	1.04933	0.215689	0.870476	0.829558	0.0648734	2.1012		4.63631	0.870476	0.0822237	0.585966		1250.85	11.4245	1256.03	7.59042	1259.06	9.9636	1270.46	25.8566	>1200		100.656
n5566-18	27/04/2016	189.319	53.4069	50.2347	0.263409	0.2821	n/a	n/a	n/a	86343.8	{0.02}		2.81429	1.15178	0.225536	0.970984	0.843028	0.0687577	2.34144		4.43387	0.970984	0.0905004	0.619509		1436.11	11.7685	1359.35	8.66577	1311.06	11.5295	1344.05	30.4237	>1200		91.2926
n5566-32	27/04/2016	350.811	144.555	95.8303	0.417982	0.412059	18.7033	15.6288	38.6305	43135.4	0.04		2.65006	0.948542	0.225772	0.879235	0.926933	0.0683768	2.08501		4.42924	0.879235	0.0851302	0.355918		1318.51	6.88323	1314.66	7.01684	1312.3	10.4481	1336.85	26.9536	>1200		99.5296
n5566-61	27/04/2016	112.058	52.6434	31.6593	0.466279	0.469786	n/a	n/a	n/a	127500	{0.01}		2.74051	1.05372	0.230635	0.878185	0.833416	0.0681481	2.16191		4.33586	0.878185	0.0861798	0.582333		1342.22	11.2086	1339.52	7.86931	1337.82	10.6184	1332.52	27.8596	>1200		99.6726
n5566-56	27/04/2016	430.613	175.932	121.405	0.407502	0.408562	18.7033	15.6288	38.6305	121482	0.02		2.80178	0.887499	0.233172	0.836075	0.942057	0.0696194	2.12626		4.28868	0.836075	0.0871477	0.297713		1363.76	5.72348	1356.01	6.66298	1351.1	10.1991	1360.34	27.9532	>1200		99.0717
n5566-24	27/04/2016	618.706	170.849	168.783	0.259835	0.276139	18.7033	15.6288	38.6305	9784.18	0.19		2.86033	0.997697	0.233397	0.933735	0.93589	0.0675674	2.19828		4.28454	0.933735	0.088883	0.351482		1401.64	6.71972	1371.53	7.53408	1352.28	11.4004	1321.53	28.102	>1200		96.4784
n5569-10	30/04/2016	116.237	47.0993	33.8321	0.417671	0.4052	18.7033	15.6288	38.6305	28730.2	0.07		2.89285	1.33226	0.240964	0.904026	0.678567	0.0718559	3.04522		4.15	0.904026	0.0870708	0.978594		1362.06	18.7372	1380.05	10.1026	1391.71	11.3259	1402.56	41.2207	>1200		102.176
n5566-38	28/04/2016	291.463	109.404	84.8544	0.349152	0.375361	18.7033	15.6288	38.6305	7518.2	0.25		3.03794	1.11445	0.243377	0.880076	0.789695	0.0685271	2.3564		4.10886	0.880076	0.0905313	0.683715		1436.76	12.9819	1417.21	8.54943	1404.23	11.1145	1339.69	30.522	>1200		97.7355
n5569-16	30/04/2016	176.338	52.1579	50.6885	0.305774	0.295783	18.7033	15.6288	38.6305	35986.1	0.05		2.95762	1.03714	0.244441	0.891894	0.859959	0.0728887	2.55809		4.09097	0.891894	0.0877542	0.529316		1377.11	10.1424	1396.8	7.90064	1409.74	11.3035	1422.03	35.0961	>1200		102.37
n5566-29	27/04/2016	489.357	175.005	144.525	0.359004	0.357623	18.7033	15.6288	38.6305	34571.2	0.05		3.10467	1.01586	0.245965	0.887168	0.873318	0.0750882	2.07156		4.06561	0.887168	0.0915462	0.494877		1457.99	9.38047	1433.85	7.83204	1417.64	11.2999	1463.42	29.2231	>1200		97.2322
n5566-13	27/04/2016	140.083	124.131	48.4685	0.917969	0.886126	18.7033	15.6288	38.6305	57341.9	0.03		3.21254	1.0426	0.253763	0.878087	0.842208	0.0777957	2.09528		3.94069	0.878087	0.0918161	0.562122		1463.59	10.6426	1460.19	8.10559	1457.85	11.4671	1514.26	30.5455	>1200		99.6082
n5566-47	27/04/2016	564.078	269.654	177.033	0.484193	0.478044	18.7033	15.6288	38.6305	178683	0.01		3.20562	0.893475	0.254478	0.852204	0.953809	0.0755539	2.02125		3.92961	0.852204	0.0913608	0.268413		1454.13	5.09769	1458.52	6.93868	1461.53	11.1538	1472.17	28.6782	>1200		100.508
n5566-36	27/04/2016	184.62	129.68	62.7529	0.714337	0.702417	18.7033	15.6288	38.6305	77892.6	0.02		3.3555	0.972643	0.260737	0.87622	0.900865	0.0780577	2.06956		3.83529	0.87622	0.0933371	0.422224		1494.74	7.96753	1494.08	7.63722	1493.61	11.6924	1519.17	30.265	>1200		99.9247
n5566-50	27/04/2016	498.127	246.497	161.372	0.506504	0.494847	18.7033	15.6288	38.6305	141939	0.01		3.34171	0.881165	0.261133	0.838665	0.951768	0.0779813	2.01307		3.82947	0.838665	0.0928123	0.270357		1484.06	5.11389	1490.85	6.9099	1495.64	11.2043	1517.74	29.4127	>1200		100.78
n5566-49	27/04/2016	171.176	89.7322	56.6772	0.535671	0.52421	n/a	n/a	n/a	83905	{0.02}		3.42598	0.997366	0.264868	0.849306	0.851549	0.0789548	2.09104		3.77546	0.849306	0.0938111	0.522894		1504.31	9.84842	1510.37	7.8694	1514.7	11.475	1535.98	30.9044	>1200		100.69
n5566-25	27/04/2016	454.667	216.495	149.377	0.489468	0.476162	18.7033	15.6288	38.6305	95586.5	0.02		3.43699	0.89036	0.265811	0.848437	0.952915	0.0793888	2.03614		3.76207	0.848437	0.0937786	0.269991		1503.66	5.09361	1512.9	7.02728	1519.51	11.4955	1544.11	30.2468	>1200		101.054
n5566-30	27/04/2016	435.379	234.561	157.567	0.545093	0.538751	18.7033	15.6288	38.6305	108146	0.02		3.9751	0.883368	0.287276	0.845468	0.957097	0.0850122	2.02521		3.48097	0.845468	0.100357	0.255973		1630.71	4.74977	1629.13	7.19209	1627.9	12.1746	1649.14	32.0469	>1200		99.8282
n5566-10	27/04/2016	808.655	415.422	291.214	0.52627	0.513719	18.7033	15.6288	38.6305	139729	0.01		3.96059	0.876922	0.28739	0.834641	0.951785	0.085662	2.16612		3.47959	0.834641	0.099951	0.26901		1623.17	4.99613	1626.16	7.13415	1628.47	12.0222	1661.24	34.5159	>1200		100.327
n5566-14	27/04/2016	151.753	121.44	58.4703	0.802998	0.800247	18.7033	15.6288	38.6305	71387	0.03		4.02272	0.971021	0.287863	0.870485	0.896464	0.0852983	2.13675		3.47388	0.870485	0.101352	0.430276		1649.03	7.95676	1638.8	7.92745	1630.84	12.555	1654.47	33.9152	>1200		98.8971
n5566-35	27/04/2016	245.518	90.223	85.9162	0.375335	0.367479	n/a	n/a	n/a	126233	{0.01}		4.02975	0.924395	0.288871	0.859823	0.930147	0.0866453	2.06891		3.46176	0.859823	0.101175	0.339427		1645.78	6.28289	1640.22	7.548	1635.88	12.4348	1679.54	33.3162	>1200		99.3987
n5566-58	27/04/2016	218.231	93.0603	77.8447	0.429814	0.42643	18.7033	15.6288	38.6305	39024.2	0.05		4.13629	0.976924	0.289177	0.907896	0.929342	0.0880128	2.13394		3.45809	0.907896	0.10374	0.360699		1692.08	6.63651	1661.5	8.01984	1637.42	13.1416	1704.96	34.8604	>1200		96.7692
n5566-15	27/04/2016	304.445	153.928	111.564	0.506011	0.5056	18.7033	15.6288	38.6305	74477.2	0.03		4.14206	0.89274	0.292777	0.840583	0.941577	0.0863001	2.03941		3.41557	0.840583	0.102607	0.300674		1671.82	5.54841	1662.64	7.32826	1655.39	12.2836	1673.12	32.7211	>1200		99.0176
n5566-19	27/04/2016	235.165	83.7634	83.3127	0.36376	0.356189	n/a	n/a	n/a	546410	{0.00}		4.12524	0.909106	0.293184	0.842297	0.926511	0.0875087	2.08468		3.41083	0.842297	0.102049	0.342067		1661.72	6.31877	1659.32	7.45716	1657.42	12.3219	1695.59	33.8772	>1200		99.7415
n5569-14	30/04/2016	225.943	85.9041	81.1198	0.389771	0.380203	18.7033	15.6288	38.6305	49326.6	0.04		4.11384	0.975952	0.296313	0.893923	0.91595	0.0864783	2.44715		3.37481	0.893923	0.100692	0.391643		1636.9	7.25536	1657.06	8.0033	1673	13.1857	1676.43	39.3313	>1200		102.205
n5566-9	27/04/2016	215.507	116.857	80.7555	0.557367	0.542244	n/a	n/a	n/a	128679	{0.01}		4.18296	0.918391	0.296476	0.847898	0.923242	0.0883562	2.06774		3.37296	0.847898	0.102328	0.352863		1666.77	6.51357	1670.69	7.55402	1673.81	12.5115	1711.34	33.901	>1200		100.423
n5566-22	27/04/2016	538.778	194.075	196.275	0.355771	0.360214	18.7033	15.6288	38.6305	78794.8	0.02		4.36323	0.869064	0.30113	0.835024	0.960832	0.0875066	2.11515		3.32083	0.835024	0.105088	0.240846		1715.86	4.42132	1705.4	7.20449	1696.91	12.4701	1695.56	34.3713	>1200		98.8957
n5566-59	27/04/2016	172.125	59.0095	62.5659	0.342487	0.342828	n/a	n/a	n/a	127777	{0.01}		4.38083	0.97007	0.30125	0.857129	0.883575	0.0888699	2.17118		3.3195	0.857129	0.10547	0.454274		1722.52	8.32142	1708.73	8.0512	1697.5	12.8045	1720.88	35.7852	>1200		98.5477
n5569-04	30/04/2016	225.92	133.168	90.7658	0.604614	0.589448	18.7033	15.6288	38.6305	109440	0.02		4.60056	1.03733	0.314199	0.943551	0.909595	0.0919429	2.43002		3.1827	0.943551	0.106195	0.431006		1735.1	7.8839	1749.37	8.68927	1761.33	14.5585	1777.84	41.314	>1200		101.512
n5569-13	30/04/2016	198.606	62.7428	140.431	0.324563	0.315916	n/a	n/a	n/a	269982	{0.01}		14.8205	0.884458	0.551674	0.853996	0.965559	0.151686	2.47081		1.81266	0.853996	0.19484	0.230123		2783.46	3.76539	2803.78	8.44802	2832.13	19.6027	2854.51	65.6688	>1200		101.749
Sample FR15-28 Skajit Limestone (Dsk): N 67033´40.12´´ W 151006´47.37´´
n5565-7	27/04/2016	251.228	128.522	32.2365	0.528845	0.511574	18.7033	15.6288	38.6305	8945.54	0.21		0.882705	1.40305	0.104884	0.950807	0.677669	0.0332882	2.33279		9.53433	0.950807	0.0610386	1.03176		640.596	22.0336	642.443	6.70147	642.968	5.82103	661.872	15.1843	643.023	5.96212	100.37
n5565-10	27/04/2016	259.812	121.613	33.3979	0.484067	0.46808	18.7033	15.6288	38.6305	12907.7	0.14		0.894266	1.17259	0.106688	0.875061	0.746264	0.0328419	2.20907		9.37314	0.875061	0.0607926	0.780534		631.904	16.7209	648.659	5.63646	653.483	5.44038	653.141	14.1927	653.987	5.58039	103.415
n5565-76	26/04/2016	175.966	121.244	25.1526	0.706919	0.689022	n/a	n/a	n/a	116534	{0.02}		0.956243	1.26861	0.11241	0.93014	0.733194	0.034244	2.22162		8.896	0.93014	0.0616967	0.862681		663.611	18.3739	681.348	6.31618	686.73	6.06193	680.56	14.8623	687.313	6.23607	103.484
n5565-73	26/04/2016	265.073	145.457	36.7247	0.563142	0.548743	18.7033	15.6288	38.6305	37924	0.05		0.959556	1.19482	0.112779	0.917074	0.767539	0.0342737	2.19417		8.86692	0.917074	0.0617081	0.765885		664.007	16.3218	683.066	5.95827	688.865	5.99436	681.14	14.691	689.491	6.16054	103.744
n5565-18	27/04/2016	227.958	162.93	33.1415	0.699965	0.714736	n/a	n/a	n/a	68082.4	{0.03}		0.98413	1.1604	0.113266	0.870202	0.749917	0.0349513	2.12486		8.82879	0.870202	0.0630162	0.76764		708.778	16.2395	695.721	5.861	691.687	5.70993	694.378	14.4988	691.245	5.86602	97.5887
n5565-15	27/04/2016	89.5296	43.1754	12.3776	0.466552	0.482247	n/a	n/a	n/a	33909.7	{0.06}		0.997527	1.46307	0.114014	0.934334	0.63861	0.0352581	2.76189		8.77086	0.934334	0.0634549	1.12588		723.513	23.7044	702.554	7.44594	696.017	6.1673	700.369	19.0032	695.298	6.34985	96.1997
n5565-62	26/04/2016	182.142	119.915	26.2226	0.675803	0.658361	18.7033	15.6288	38.6305	14110.2	0.13		0.974746	1.36525	0.113896	0.906511	0.663989	0.0349392	2.59982		8.77995	0.906511	0.06207	1.02085		676.523	21.6737	690.907	6.86577	695.334	5.978	694.141	17.7323	695.815	6.15295	102.781
n5565-26	27/04/2016	161.784	84.8909	22.8196	0.52178	0.524717	n/a	n/a	n/a	41077.5	{0.05}		1.00271	1.22387	0.114914	0.883944	0.722252	0.0359502	2.20983		8.70218	0.883944	0.0632851	0.846466		717.826	17.8713	705.184	6.24104	701.222	5.87586	713.877	15.4942	700.784	6.0425	97.6868
n5565-34	27/04/2016	457.575	294.093	66.5165	0.660348	0.642721	n/a	n/a	n/a	95555.3	{0.02}		0.993493	0.9843	0.115019	0.83834	0.851712	0.0360076	2.0435		8.6942	0.83834	0.062646	0.515783		696.236	10.9523	700.501	4.99315	701.831	5.57717	714.997	14.3504	701.978	5.72949	100.804
n5565-28	27/04/2016	799.099	499.225	116.938	0.640518	0.624735	18.7033	15.6288	38.6305	82986.7	0.02		1.00888	0.940682	0.116232	0.843337	0.896517	0.036477	2.01939		8.60347	0.843337	0.0629522	0.41673		706.617	8.83982	708.307	4.80823	708.84	5.66346	724.153	14.3595	708.899	5.81558	100.315
n5565-5	27/04/2016	373.984	147.227	52.5625	0.397079	0.393672	18.7033	15.6288	38.6305	9554.41	0.2		1.03447	1.41987	0.118767	0.868848	0.611921	0.0362673	2.32685		8.41983	0.868848	0.063171	1.123		713.993	23.6808	721.159	7.35726	723.465	5.94866	720.064	16.4532	723.722	6.13298	101.327
n5565-24	27/04/2016	293.069	182.362	60.1373	0.618474	0.622248	18.7033	15.6288	38.6305	51562.4	0.04		1.61017	1.01181	0.162879	0.875352	0.865135	0.0492432	2.09267		6.13954	0.875352	0.0716977	0.507463		977.373	10.3071	974.173	6.35756	972.754	7.90855	971.585	19.8414	972.554	8.25546	99.5275
n5565-66	26/04/2016	338.928	893.099	104.525	2.63232	2.63507	n/a	n/a	n/a	222590	{0.01}		1.63413	0.986861	0.164101	0.86228	0.873761	0.0502625	2.07698		6.09379	0.86228	0.0722227	0.479965		992.222	9.72831	983.453	6.23546	979.529	7.84066	991.211	20.0806	978.968	8.18854	98.7208
n5565-8	27/04/2016	451.107	280.656	96.7432	0.606057	0.622151	18.7033	15.6288	38.6305	37791.1	0.05		1.72953	0.930137	0.170082	0.840492	0.903622	0.0511646	2.04827		5.87953	0.840492	0.0737514	0.398406		1034.67	8.02766	1019.58	6.00206	1012.56	7.88059	1008.56	20.1411	1011.53	8.24221	97.863
n5565-54	26/04/2016	122.136	40.0693	24.3766	0.320206	0.328072	n/a	n/a	n/a	66071.1	{0.03}		1.72301	1.29158	0.170478	0.886836	0.686629	0.0506365	2.32779		5.86586	0.886836	0.0733024	0.938989		1022.32	18.889	1017.15	8.3324	1014.74	8.33196	998.407	22.6634	1014.39	8.75902	99.2585
n5565-58	26/04/2016	103.987	40.9464	21.2276	0.392977	0.393765	n/a	n/a	n/a	130170	{0.01}		1.73894	1.26005	0.170846	0.935227	0.742217	0.0525168	2.38191		5.85323	0.935227	0.0738208	0.844433		1036.57	16.9608	1023.07	8.1557	1016.77	8.80312	1034.55	24.0077	1015.83	9.23828	98.0897
n5565-64	26/04/2016	312.087	118.091	63.7695	0.369684	0.378391	n/a	n/a	n/a	237067	{0.01}		1.75593	1.05288	0.172036	0.931001	0.88424	0.0516974	2.13623		5.81274	0.931001	0.0740265	0.491732		1042.19	9.89089	1029.35	6.83455	1023.32	8.81543	1018.81	21.2135	1022.42	9.23264	98.1891
n5565-53	26/04/2016	146.249	63.6411	30.3292	0.431888	0.435155	n/a	n/a	n/a	43136.2	{0.04}		1.74153	1.13129	0.172355	0.885881	0.783071	0.051464	2.25601		5.80198	0.885881	0.0732835	0.703587		1021.8	14.1763	1024.03	7.32331	1025.07	8.40119	1014.32	22.3062	1025.23	8.82279	100.32
n5565-1	27/04/2016	182.4	68.8395	37.3755	0.376283	0.377409	n/a	n/a	n/a	582605	{0.00}		1.75239	1.04164	0.172468	0.858252	0.823943	0.0522821	2.15502		5.79817	0.858252	0.073692	0.590268		1033.04	11.8817	1028.04	6.75635	1025.7	8.14357	1030.04	21.6298	1025.34	8.54264	99.2886
n5565-45	26/04/2016	128.854	131.68	30.5066	1.01519	1.02193	18.7033	15.6288	38.6305	30441.4	0.06		1.72902	1.19409	0.172327	0.906032	0.758763	0.0507733	2.16246		5.80291	0.906032	0.0727688	0.777793		1007.52	15.6978	1019.39	7.71097	1024.92	8.59125	1001.04	21.1087	1025.74	9.02525	101.727
n5565-60	26/04/2016	181.141	90.76	38.5666	0.493563	0.501045	n/a	n/a	n/a	224201	{0.01}		1.77454	1.07116	0.173948	0.863748	0.80637	0.0520715	2.15279		5.74883	0.863748	0.0739886	0.633493		1041.16	12.7326	1036.18	6.98022	1033.83	8.25571	1026	21.5249	1033.47	8.66842	99.2964
n5565-48	26/04/2016	162.721	131.436	37.2707	0.816827	0.807739	n/a	n/a	n/a	114933	{0.02}		1.75811	1.08862	0.173888	0.867035	0.796453	0.0525025	2.23074		5.75083	0.867035	0.0733288	0.658288		1023.05	13.265	1030.15	7.07052	1033.5	8.28469	1034.27	22.4791	1034	8.70711	101.021
n5565-40	26/04/2016	127.883	41.1056	26.1005	0.3073	0.321431	n/a	n/a	n/a	47196.7	{0.04}		1.79669	1.14845	0.174528	0.885514	0.77105	0.0514485	2.30285		5.72972	0.885514	0.0746632	0.731306		1059.45	14.649	1044.26	7.51933	1037.01	8.48794	1014.02	22.7625	1035.92	8.91575	97.8824
n5565-20	27/04/2016	208.291	87.0529	44.571	0.418142	0.417939	18.7033	15.6288	38.6305	44678.4	0.04		1.8386	1.03887	0.178001	0.866028	0.833627	0.0541926	2.17352		5.61796	0.866028	0.0749142	0.573796		1066.2	11.494	1059.36	6.85548	1056.04	8.44131	1066.7	22.5712	1055.54	8.86906	99.0474
n5565-70	26/04/2016	362.865	254.023	84.4565	0.705481	0.700048	18.7033	15.6288	38.6305	50020.4	0.04		1.87061	1.00764	0.180877	0.866374	0.859801	0.0547168	2.15203		5.52861	0.866374	0.0750065	0.514533		1068.68	10.307	1070.75	6.68924	1071.77	8.56035	1076.75	22.553	1071.92	9.00706	100.289
n5565-50	26/04/2016	82.3536	80.0677	20.4956	0.970126	0.972243	n/a	n/a	n/a	30229	{0.06}		1.89134	1.28611	0.181981	0.915979	0.712211	0.0546932	2.29686		5.49508	0.915979	0.0753776	0.902802		1078.59	18.0127	1078.05	8.57848	1077.79	9.09757	1076.3	24.0601	1077.75	9.60918	99.9259
n5565-27	27/04/2016	199.73	80.9818	43.7817	0.404624	0.405456	n/a	n/a	n/a	82656.7	{0.02}		1.91143	1.03336	0.182937	0.862086	0.834255	0.0552566	2.21184		5.46636	0.862086	0.0757802	0.569772		1089.27	11.3744	1085.08	6.91211	1083	8.6	1087.09	23.3961	1082.67	9.06169	99.4245
n5565-36	27/04/2016	160.889	73.9679	36.4765	0.465175	0.459743	n/a	n/a	n/a	48946.4	{0.04}		1.96125	1.09814	0.186396	0.897163	0.816987	0.0567646	2.18433		5.36491	0.897163	0.0763123	0.633247		1103.27	12.6102	1102.31	7.41187	1101.82	9.09291	1115.96	23.7015	1101.74	9.60093	99.8685
n5565-31	27/04/2016	183.225	83.8526	42.6755	0.454842	0.457649	18.7033	15.6288	38.6305	40960	0.05		2.05052	1.04639	0.191758	0.871005	0.832388	0.0574318	2.59584		5.2149	0.871005	0.0775546	0.579905		1135.49	11.4972	1132.47	7.16715	1130.89	9.04085	1128.71	28.4764	1130.63	9.56037	99.5953
n5565-47	26/04/2016	100.06	33.7048	22.8241	0.333746	0.336847	n/a	n/a	n/a	76944.9	{0.02}		2.06699	1.20988	0.193944	0.922392	0.762384	0.0569102	2.42996		5.15613	0.922392	0.0772966	0.782943		1128.85	15.5175	1137.94	8.31332	1142.7	9.6661	1118.74	26.4291	1143.5	10.2623	101.227
n5565-22	27/04/2016	177.6	99.0704	43.4611	0.546519	0.557828	18.7033	15.6288	38.6305	41376	0.05		2.14405	1.13174	0.196409	0.889872	0.786284	0.0587167	2.12551		5.09142	0.889872	0.0791721	0.699265		1176.44	13.7703	1163.13	7.86692	1156	9.4242	1153.26	23.8124	1154.8	9.99169	98.2624
n5565-33	27/04/2016	311.8	96.5035	72.1698	0.306522	0.309505	n/a	n/a	n/a	116300	{0.02}		2.16324	0.954392	0.197256	0.85526	0.896131	0.0598271	2.10487		5.06956	0.85526	0.0795377	0.42355		1185.55	8.34448	1169.31	6.64891	1160.56	9.09004	1174.45	24.0018	1159.07	9.62532	97.8925
n5565-43	26/04/2016	473.211	59.4483	105.807	0.157617	0.125628	18.7033	15.6288	38.6305	145475	0.01		2.19139	0.940228	0.198032	0.8726	0.928073	0.0769615	2.8372		5.04969	0.8726	0.0802571	0.350139		1203.31	6.8837	1178.31	6.57671	1164.74	9.30495	1498.61	40.939	1162.43	9.84367	96.7944
n5565-49	26/04/2016	167.148	74.8529	40.1937	0.446911	0.447825	n/a	n/a	n/a	100242	{0.02}		2.16459	1.04651	0.197891	0.863355	0.824988	0.0600183	2.19172		5.05328	0.863355	0.0793321	0.591433		1180.43	11.6481	1169.75	7.29439	1163.98	9.20082	1178.09	25.0669	1163	9.76058	98.6064
n5565-46	26/04/2016	109.213	38.3107	25.5934	0.346155	0.350788	n/a	n/a	n/a	37867.4	{0.05}		2.15947	1.18904	0.197961	0.935478	0.786752	0.0590682	2.44137		5.0515	0.935478	0.0791165	0.733957		1175.05	14.4532	1168.1	8.28571	1164.36	9.97297	1159.97	27.5031	1163.72	10.5903	99.0899
n5565-2	27/04/2016	272.963	118.246	65.7385	0.435225	0.433195	18.7033	15.6288	38.6305	62086	0.03		2.16767	0.99082	0.199161	0.884727	0.892924	0.0599037	2.48158		5.02105	0.884727	0.078938	0.446074		1170.58	8.80611	1170.73	6.90803	1170.81	9.47925	1175.91	28.3286	1170.83	10.0519	100.02
n5565-14	27/04/2016	72.0227	20.6168	16.7195	0.285298	0.286254	n/a	n/a	n/a	37537.9	{0.05}		2.17406	1.27109	0.199297	0.932393	0.733541	0.0596598	2.49178		5.01765	0.932393	0.0791173	0.863888		1175.07	16.9977	1172.78	8.87889	1171.54	9.99602	1171.26	28.3358	1171.33	10.6394	99.6995
n5565-52	26/04/2016	189.041	180.55	52.3594	0.951651	0.955081	n/a	n/a	n/a	58499.5	{0.03}		2.23724	1.11753	0.202558	0.87199	0.780284	0.0609264	2.07167		4.93686	0.87199	0.0801054	0.698932		1199.58	13.7177	1192.79	7.87244	1189.05	9.47528	1195.4	24.0323	1188.39	10.0871	99.1214
n5565-71	26/04/2016	200.304	76.8385	50.5997	0.39137	0.383609	n/a	n/a	n/a	67252.7	{0.03}		2.36617	1.01326	0.210886	0.860411	0.849152	0.0640426	2.17119		4.7419	0.860411	0.0813762	0.535151		1230.55	10.4675	1232.45	7.25791	1233.54	9.66705	1254.68	26.396	>1200		100.243
n5565-65	26/04/2016	850.956	425.517	228.5	0.439345	0.500045	18.7033	15.6288	38.6305	4951.43	0.38		2.67348	0.991772	0.217437	0.947003	0.95486	0.0633829	2.13016		4.59903	0.947003	0.0891748	0.294613		1407.92	5.62965	1321.15	7.35551	1268.32	10.9125	1242.15	25.6468	>1200		90.0847
n5565-21	27/04/2016	160.068	66.789	42.2514	0.422405	0.417255	n/a	n/a	n/a	67089.1	{0.03}		2.49425	1.0198	0.218629	0.860556	0.843845	0.0652846	2.17796		4.57395	0.860556	0.0827427	0.547214		1263.15	10.6529	1270.36	7.41853	1274.63	9.96023	1278.26	26.96	>1200		100.908
n5565-79	26/04/2016	94.2065	25.5228	24.4555	0.262052	0.270924	n/a	n/a	n/a	42061.9	{0.04}		2.59611	1.17149	0.223366	0.901657	0.769668	0.0642237	2.48433		4.47695	0.901657	0.0842955	0.747929		1299.38	14.4675	1299.54	8.62384	1299.64	10.6213	1258.12	30.2804	>1200		100.02
n5565-4	27/04/2016	412.163	335.923	124.962	0.827093	0.815026	18.7033	15.6288	38.6305	50624.9	0.04		2.69774	0.918314	0.226709	0.846002	0.921256	0.0698265	2.045		4.41094	0.846002	0.0863039	0.357185		1345	6.88216	1327.84	6.82565	1317.23	10.0869	1364.25	26.9602	>1200		97.9353
n5565-25	27/04/2016	77.2868	51.6589	22.6457	0.684066	0.668405	n/a	n/a	n/a	88125.6	{0.02}		2.67647	1.19846	0.227247	0.926925	0.773429	0.0693438	2.36011		4.40049	0.926925	0.0854206	0.759685		1325.1	14.6408	1321.98	8.89789	1320.06	11.0739	1355.13	30.9105	>1200		99.6191
n5565-35	27/04/2016	169.962	68.7578	46.7534	0.401636	0.404549	18.7033	15.6288	38.6305	55484.2	0.03		2.69219	1.0375	0.228291	0.893374	0.861084	0.067398	2.16349		4.38038	0.893374	0.0855297	0.527529		1327.57	10.1781	1326.31	7.71058	1325.53	10.7127	1318.32	27.5926	>1200		99.8463
n5565-39	26/04/2016	107.331	54.1004	30.9187	0.51145	0.504054	n/a	n/a	n/a	149923	{0.01}		2.77021	1.18701	0.232783	0.883744	0.744514	0.0698246	2.1931		4.29586	0.883744	0.0863098	0.792455		1345.13	15.2267	1347.54	8.8947	1349.07	10.7664	1364.22	28.9107	>1200		100.293
n5565-16	27/04/2016	203.142	112.251	59.4103	0.540474	0.552574	18.7033	15.6288	38.6305	36994.8	0.05		2.83028	0.969153	0.233793	0.848767	0.875782	0.0690154	2.08706		4.27728	0.848767	0.0878003	0.467817		1378.12	8.96625	1363.6	7.29761	1354.35	10.3764	1348.92	27.2157	>1200		98.2753
n5565-23	27/04/2016	184.708	64.6919	51.696	0.343704	0.350239	n/a	n/a	n/a	82158.8	{0.02}		2.84071	0.978258	0.23509	0.853273	0.872237	0.0690589	2.25228		4.25369	0.853273	0.0876378	0.47845		1374.56	9.17393	1366.36	7.37352	1361.12	10.4784	1349.75	29.3858	>1200		99.0225
n5565-56	26/04/2016	209.934	108.179	61.7969	0.521894	0.515301	18.7033	15.6288	38.6305	50059.2	0.04		2.86694	1.04568	0.236723	0.851423	0.814229	0.0715065	2.16614		4.22435	0.851423	0.087837	0.607064		1378.92	11.6236	1373.27	7.90258	1369.64	10.5144	1395.97	29.197	>1200		99.3267
n5565-78	27/04/2016	176.242	70.7819	50.3464	0.389051	0.401619	18.7033	15.6288	38.6305	54447	0.03		2.89879	1.03149	0.236741	0.865262	0.838848	0.0694749	2.48407		4.22403	0.865262	0.088806	0.561507		1399.98	10.7233	1381.6	7.81721	1369.73	10.6861	1357.61	32.59	>1200		97.8393
n5565-67	26/04/2016	128.327	51.8683	36.9643	0.397142	0.404189	n/a	n/a	n/a	102886	{0.02}		2.89352	1.09783	0.239044	0.921322	0.839221	0.0693191	2.25083		4.18333	0.921322	0.0877904	0.59699		1377.9	11.433	1380.22	8.31815	1381.73	11.4685	1354.67	29.4705	>1200		100.278
n5565-74	26/04/2016	264.382	77.8288	74.2578	0.292759	0.29438	18.7033	15.6288	38.6305	104538	0.02		2.88903	0.992724	0.239351	0.895461	0.902025	0.0698736	2.17426		4.17797	0.895461	0.087542	0.428543		1372.45	8.22198	1379.05	7.5158	1383.32	11.1579	1365.14	28.6812	>1200		100.792
n5565-12	27/04/2016	208.552	98.3502	61.7055	0.464044	0.471586	18.7033	15.6288	38.6305	66629	0.03		2.95499	1.21584	0.241123	0.949973	0.781333	0.070658	2.1949		4.14726	0.949973	0.0888824	0.758821		1401.63	14.4703	1396.13	9.26607	1392.53	11.9084	1379.96	29.2567	>1200		99.3513
n5565-30	27/04/2016	177.22	75.1298	52.187	0.436528	0.423935	n/a	n/a	n/a	89532.7	{0.02}		2.9587	0.985029	0.241728	0.858859	0.871913	0.0738084	2.11383		4.13688	0.858859	0.0887713	0.482331		1399.23	9.21677	1397.08	7.50292	1395.67	10.7871	1439.35	29.346	>1200		99.7459
n5565-44	26/04/2016	68.3732	43.5998	21.7698	0.663691	0.637674	n/a	n/a	n/a	103189	{0.02}		3.05151	1.24595	0.248462	0.975172	0.782672	0.0749647	2.27473		4.02477	0.975172	0.0890748	0.775522		1405.77	14.7788	1420.61	9.57359	1430.54	12.5229	1461.1	32.0377	>1200		101.762
n5565-32b	27/04/2016	202.982	116.947	63.6979	0.58208	0.576144	18.7033	15.6288	38.6305	83434.1	0.02		3.09415	0.968621	0.248677	0.860041	0.887902	0.0741018	2.08448		4.02129	0.860041	0.0902413	0.445597		1430.64	8.48033	1431.24	7.46029	1431.65	11.0508	1444.87	29.0458	>1200		100.07
n5565-69	26/04/2016	222.512	163.336	73.0126	0.739159	0.734054	n/a	n/a	n/a	163817	{0.01}		3.12798	0.987239	0.251157	0.881697	0.893094	0.0739529	2.10371		3.98157	0.881697	0.0903269	0.444129		1432.45	8.4504	1439.6	7.62444	1444.44	11.4197	1442.07	29.2587	>1200		100.837
n5565-38	27/04/2016	351.965	211.379	114.891	0.585366	0.600567	18.7033	15.6288	38.6305	36565.8	0.05		3.4256	0.903479	0.253868	0.839701	0.929408	0.0794491	2.03007		3.93906	0.839701	0.0978651	0.333431		1583.84	6.2218	1510.29	7.12583	1458.39	10.969	1545.24	30.1778	>1200		92.0796
n5565-63	26/04/2016	189.964	92.9189	59.789	0.490623	0.489139	18.7033	15.6288	38.6305	62551.7	0.03		3.21278	0.988493	0.254789	0.867046	0.877139	0.0749234	2.35651		3.92482	0.867046	0.0914534	0.47471		1456.06	9.00168	1460.25	7.68348	1463.12	11.3593	1460.32	33.1716	>1200		100.485
n5565-19	27/04/2016	248.801	120.776	78.7042	0.486618	0.485431	n/a	n/a	n/a	104298	{0.02}		3.24531	0.984648	0.25623	0.857336	0.870703	0.0753284	2.0636		3.90274	0.857336	0.0918595	0.484259		1464.48	9.17178	1468.06	7.6718	1470.53	11.2826	1467.94	29.1974	>1200		100.413
n5565-37	26/04/2016	73.3044	18.6302	22.2099	0.247071	0.254148	n/a	n/a	n/a	45688.6	{0.04}		3.39289	1.23692	0.258966	1.01114	0.817464	0.0763689	2.54244		3.86151	1.01114	0.0950225	0.712443		1528.52	13.3597	1502.75	9.7471	1484.55	13.4218	1487.48	36.4274	>1200		97.1233
n5565-32a	27/04/2016	211.628	167.256	80.3236	0.785933	0.79033	18.7033	15.6288	38.6305	32622	0.06		3.95811	0.942459	0.284338	0.849663	0.901539	0.08415	2.04984		3.51695	0.849663	0.100961	0.407801		1641.85	7.54914	1625.65	7.66837	1613.17	12.1375	1633.07	32.1332	>1200		98.2533
n5565-59	26/04/2016	247.638	109.799	87.4652	0.435502	0.443386	n/a	n/a	n/a	120168	{0.02}		4.00512	0.943897	0.287223	0.869138	0.920798	0.0832831	2.10793		3.48161	0.869138	0.101133	0.368158		1645.02	6.81418	1635.24	7.69841	1627.64	12.514	1616.9	32.729	>1200		98.9435
n5565-17	27/04/2016	170.29	192.788	70.421	1.12624	1.13212	n/a	n/a	n/a	113539	{0.02}		4.04466	0.953119	0.287848	0.856494	0.898623	0.0851082	2.06443		3.47405	0.856494	0.10191	0.418154		1659.2	7.72314	1643.22	7.78918	1630.77	12.3526	1650.93	32.7011	>1200		98.2866
n5565-61	26/04/2016	116.476	165.659	51.1008	1.42824	1.42226	18.7033	15.6288	38.6305	44613.9	0.04		4.01642	1.16268	0.288939	0.910047	0.782716	0.0848333	2.08989		3.46093	0.910047	0.100816	0.723628		1639.19	13.3742	1637.53	9.49652	1636.23	13.1644	1645.81	33.0056	>1200		99.8191
n5565-55	26/04/2016	98.9658	125.409	42.2765	1.26202	1.2672	18.7033	15.6288	38.6305	33679.2	0.06		4.05742	1.11216	0.290576	0.937987	0.843392	0.0845803	2.22879		3.44144	0.937987	0.101272	0.597562		1647.56	11.041	1645.79	9.10045	1644.41	13.6286	1641.09	35.1005	>1200		99.8087
n5565-68	26/04/2016	224.578	177.205	87.9813	0.782324	0.789058	n/a	n/a	n/a	96177.7	{0.02}		4.15481	1.03858	0.294345	0.868742	0.836471	0.0852706	2.05278		3.39737	0.868742	0.102375	0.569154		1667.62	10.491	1665.16	8.53557	1663.21	12.7481	1653.95	32.5738	>1200		99.7354
n5565-9	27/04/2016	188.088	164.063	75.217	0.872967	0.872264	n/a	n/a	n/a	283641	{0.01}		4.14724	0.958435	0.295136	0.852334	0.889298	0.0856256	2.09894		3.38827	0.852334	0.101915	0.438319		1659.28	8.09448	1663.67	7.87154	1667.14	12.533	1660.56	33.4332	>1200		100.474
n5565-51	26/04/2016	203.684	157.181	89.6161	0.765329	0.771689	18.7033	15.6288	38.6305	116328	0.02		5.10869	0.926478	0.330161	0.852169	0.919795	0.094291	2.04545		3.02882	0.852169	0.112223	0.36355		1835.72	6.57074	1837.55	7.89795	1839.16	13.6498	1821.26	35.5924	>1200		100.187
n5565-6	27/04/2016	147.975	103.56	64.5069	0.714171	0.699843	n/a	n/a	n/a	136949	{0.01}		5.11923	0.973961	0.330918	0.864526	0.887639	0.0969981	2.07698		3.02189	0.864526	0.112197	0.448548		1835.31	8.1032	1839.3	8.3072	1842.83	13.8718	1871.2	37.0856	>1200		100.41
n5565-11	27/04/2016	348.477	109.139	144.495	0.312112	0.313189	18.7033	15.6288	38.6305	121200	0.02		5.53122	0.905488	0.343653	0.851705	0.940603	0.0985928	2.04751		2.90991	0.851705	0.116735	0.307421		1906.82	5.51085	1905.46	7.81645	1904.22	14.0577	1900.56	37.1065	>1200		99.8638
n5565-29	27/04/2016	321.06	226.386	160.808	0.703575	0.705121	18.7033	15.6288	38.6305	142104	0.01		6.65886	0.904387	0.376533	0.870678	0.962728	0.107839	2.02447		2.65581	0.870678	0.128261	0.244611		2074.28	4.30206	2067.18	8.01554	2060.07	15.3713	2069.96	39.792	>1200		99.3148
n5565-41	27/04/2016	162.088	71.089	81.9093	0.433662	0.438583	18.7033	15.6288	38.6305	81258.1	0.02		7.65651	0.943978	0.399598	0.884677	0.93718	0.114482	2.09633		2.50251	0.884677	0.138965	0.329303		2214.35	5.69937	2191.51	8.51332	2167.19	16.3032	2190.8	43.4783	>1200		97.8702
n5565-57	26/04/2016	88.7172	64.2773	51.6968	0.733157	0.724519	n/a	n/a	n/a	65820.8	{0.03}		8.68005	0.992367	0.431462	0.894929	0.901812	0.121873	2.20859		2.3177	0.894929	0.145908	0.428831		2298.51	7.35093	2304.99	9.07583	2312.3	17.4123	2324.4	48.4365	>1200		100.6
n5565-13	27/04/2016	63.9357	36.9177	41.8589	0.549266	0.57742	n/a	n/a	n/a	71673	{0.03}		12.2752	1.23122	0.487944	1.07601	0.873933	0.13462	2.33811		2.04942	1.07601	0.182456	0.598433		2675.32	9.8695	2625.68	11.6262	2561.77	22.7868	2552.77	55.9935	>1200		95.7557
n5565-72	26/04/2016	141.547	102.623	95.4981	0.720043	0.725005	n/a	n/a	n/a	306042	{0.01}		11.7115	0.926462	0.49149	0.875664	0.94517	0.135506	2.06928		2.03463	0.875664	0.17282	0.302563		2585.15	5.0417	2581.62	8.70429	2577.12	18.6285	2568.53	49.8502	>1200		99.6894
Sample FR15-37 Hunt Fork Shale (Dhf): N 67027´25.80´´ W 150054´28.14´´
n5571-02	2016-05-01	80.776	34.6703	5.9214	0.496174	0.429215	n/a	n/a	n/a	7974.65	{0.23}		0.452492	2.03286	0.0615236	1.10024	0.541229	0.0198058	3.11039		16.2539	1.10024	0.0533418	1.70938		343.363	38.2284	379.023	6.4508	384.885	4.11205	396.407	12.206	385.368	4.18844	112.093
n5571-70	2016-05-01	269.61	128.27	20.2846	0.463577	0.475761	18.7033	15.6288	38.6305	14993.8	0.12		0.471856	1.60239	0.0624766	1.07371	0.670067	0.0196274	3.81386		16.006	1.07371	0.054776	1.18946		403.092	26.4183	392.47	5.2295	390.669	4.07136	392.87	14.8334	390.521	4.12583	96.9181
n5571-72	2016-05-01	1840.2	440.25	130.24	0.229641	0.23924	n/a	n/a	n/a	306524	{0.01}		0.47292	1.8769	0.0627914	1.81337	0.966149	0.019034	3.15852		15.9257	1.81337	0.0546243	0.484211		396.879	10.8187	393.204	6.1375	392.579	6.91016	381.104	11.921	392.527	6.99021	98.9166
n5571-03	2016-05-01	237.641	147.757	18.9132	0.591731	0.621766	n/a	n/a	n/a	32631.6	{0.06}		0.484421	1.32584	0.0638193	0.898757	0.677877	0.0197095	2.6149		15.6692	0.898757	0.0550516	0.974727		414.319	21.6388	401.102	4.4028	398.811	3.47666	394.498	10.2131	398.619	3.52738	96.2571
n5571-11	2016-05-01	336.191	203.293	26.6443	0.58214	0.604693	n/a	n/a	n/a	38205.1	{0.05}		0.483517	1.23368	0.0640282	0.906938	0.735149	0.0193791	2.56463		15.6181	0.906938	0.0547696	0.836317		402.828	18.621	400.483	4.09096	400.077	3.51911	387.947	9.85212	400.043	3.56891	99.3169
n5571-50	2016-05-01	211.556	197.27	18.218	0.981183	0.932468	n/a	n/a	n/a	>1e6	{0.00}		0.479	1.39344	0.0641602	0.894277	0.641776	0.0198181	2.51675		15.586	0.894277	0.0541463	1.06862		377.139	23.8622	397.387	4.5927	400.876	3.47669	396.65	9.88298	401.169	3.5338	106.294
n5571-01	2016-05-01	307.881	202.939	24.8758	0.632194	0.659148	n/a	n/a	n/a	50362.8	{0.04}		0.487193	1.31454	0.0643115	0.899331	0.684139	0.0196491	2.52829		15.5493	0.899331	0.0549429	0.958765		409.9	21.3031	402.996	4.38204	401.793	3.50409	393.3	9.84525	401.692	3.55595	98.0222
n5571-49	2016-05-01	169.365	151.298	14.6649	1.01916	0.893326	18.7033	15.6288	38.6305	13052	0.14		0.480045	1.6161	0.0647906	0.925249	0.572518	0.0205029	2.93327		15.4343	0.925249	0.0537364	1.32503		360.017	29.6245	398.103	5.33638	404.694	3.63034	410.218	11.908	405.243	3.69273	112.41
n5571-56	2016-05-01	615.534	372.83	49.5826	0.630804	0.605702	18.7033	15.6288	38.6305	58367.5	0.03		0.486175	1.06089	0.06488	0.841543	0.793245	0.0200528	2.40802		15.4131	0.841543	0.0543477	0.645977		385.484	14.4457	402.301	3.53002	405.235	3.3061	401.302	9.56585	405.48	3.35298	105.124
n5571-20	2016-05-01	195.528	224.351	17.9204	1.07028	1.14741	n/a	n/a	n/a	51350.6	{0.04}		0.496974	1.40469	0.0649927	0.90557	0.644678	0.0200922	2.50126		15.3863	0.90557	0.0554584	1.07382		430.75	23.7545	409.652	4.74616	405.918	3.56351	402.082	9.95528	405.602	3.61784	94.235
n5571-73a	2016-05-01	600.466	522.999	51.8579	0.880823	0.870988	n/a	n/a	n/a	79862.8	{0.02}		0.491219	1.07071	0.0650083	0.862112	0.805179	0.0204272	2.42315		15.3827	0.862112	0.0548031	0.634964		404.201	14.1541	405.741	3.58758	406.012	3.39322	408.719	9.80202	406.035	3.4399	100.448
n5571-21	2016-05-01	210.784	140.951	17.3278	0.610881	0.6687	18.7033	15.6288	38.6305	7129.68	0.26		0.500223	1.75653	0.0653683	1.01021	0.575119	0.0197554	3.05559		15.2979	1.01021	0.0555003	1.43696		432.434	31.6996	411.854	5.96441	408.191	3.99699	395.407	11.9611	407.883	4.05767	94.3937
n5571-59	2016-05-01	191.449	103.436	15.3143	0.496962	0.540279	n/a	n/a	n/a	27351.6	{0.07}		0.502044	1.54593	0.0655861	0.904166	0.584867	0.0199232	2.84706		15.2471	0.904166	0.0555173	1.25395		433.117	27.6937	413.085	5.26022	409.508	3.58848	398.733	11.2378	409.206	3.64862	94.5491
n5571-76	2016-05-01	129.555	66.4928	10.3031	0.479221	0.51324	n/a	n/a	n/a	66215.2	{0.03}		0.501325	1.64805	0.0655995	0.939636	0.57015	0.0200519	2.75381		15.244	0.939636	0.0554265	1.35394		429.47	29.9005	412.599	5.60329	409.589	3.73001	401.284	10.9387	409.335	3.79426	95.3709
n5571-25	2016-05-01	150.745	159.16	13.7029	1.04868	1.05582	n/a	n/a	n/a	30955.7	{0.06}		0.498328	1.51742	0.0657543	0.922338	0.607831	0.0203943	2.53566		15.2081	0.922338	0.0549655	1.20494		410.819	26.7233	410.57	5.1374	410.526	3.66943	408.066	10.2408	410.522	3.73112	99.9287
n5571-14	2016-05-01	807.353	308.265	62.1001	0.353835	0.381821	18.7033	15.6288	38.6305	20758.4	0.09		0.501416	1.24492	0.0657929	0.928169	0.745566	0.0196127	2.54122		15.1992	0.928169	0.0552736	0.829653		423.306	18.4078	412.66	4.23031	410.759	3.69467	392.579	9.87761	410.6	3.74553	97.036
n5571-30	2016-05-01	86.1046	34.1758	6.69478	0.385509	0.396911	n/a	n/a	n/a	16168	{0.12}		0.502872	2.1497	0.0658716	1.45168	0.675294	0.0207427	3.52921		15.1811	1.45168	0.055368	1.5855		427.112	34.9732	413.645	7.33009	411.235	5.78597	414.968	14.4906	411.031	5.87241	96.2827
n5571-58	2016-05-01	515.071	370.933	43.2875	0.728344	0.720159	18.7033	15.6288	38.6305	23005.5	0.08		0.496857	1.11814	0.065866	0.846387	0.75696	0.0202347	2.42665		15.1823	0.846387	0.0547102	0.730661		400.401	16.2873	409.572	3.77558	411.201	3.37256	404.906	9.72557	411.338	3.42098	102.697
n5571-79	2016-05-01	288.83	249.754	25.2954	0.934092	0.86471	n/a	n/a	n/a	27761.4	{0.07}		0.494175	1.30745	0.0658461	0.890163	0.680837	0.0209881	2.57466		15.1869	0.890163	0.0544314	0.957626		388.939	21.356	407.752	4.40024	411.081	3.54603	419.825	10.6948	411.362	3.60324	105.693
n5571-22	2016-05-01	179.059	111.896	14.7556	0.621951	0.624914	n/a	n/a	n/a	28676	{0.07}		0.500241	1.44795	0.0659926	0.93796	0.647784	0.02046	2.59119		15.1532	0.93796	0.0549773	1.10308		411.299	24.4795	411.866	4.9142	411.967	3.74429	409.368	10.4981	411.976	3.80447	100.162
n5571-55	2016-05-01	392.699	378.499	35.1782	0.988059	0.963842	n/a	n/a	n/a	538313	{0.00}		0.498741	1.17196	0.0660008	0.875617	0.747138	0.0207117	2.42318		15.1513	0.875617	0.0548055	0.778967		404.298	17.3465	410.849	3.96771	412.017	3.49576	414.352	9.93586	412.115	3.54751	101.909
n5571-77	2016-05-01	429.787	237.468	34.8354	0.564263	0.552525	n/a	n/a	n/a	47221.4	{0.04}		0.498987	1.15622	0.0660336	0.890708	0.770362	0.0206328	3.15871		15.1438	0.890708	0.0548053	0.737215		404.29	16.4215	411.016	3.91561	412.215	3.55769	412.792	12.9025	412.316	3.60942	101.96
n5571-57	2016-05-01	572.993	258.82	45.2349	0.471505	0.451699	18.7033	15.6288	38.6305	23387.8	0.08		0.496763	1.21514	0.0661403	0.837046	0.688849	0.0203715	3.53117		15.1194	0.837046	0.054473	0.880859		390.657	19.6485	409.509	4.10326	412.86	3.34836	407.615	14.2444	413.142	3.40066	105.684
n5571-38	2016-05-01	225.471	122.616	18.2944	0.534606	0.543824	n/a	n/a	n/a	30950.3	{0.06}		0.504233	1.33992	0.0662138	0.900869	0.672333	0.0207195	2.69981		15.1026	0.900869	0.0552309	0.991871		421.582	21.989	414.564	4.57089	413.304	3.60749	414.508	11.0739	413.197	3.66326	98.0366
n5571-47	2016-05-01	604.318	390.489	50.203	0.669552	0.646164	n/a	n/a	n/a	80831.5	{0.02}		0.498475	1.04329	0.0662044	0.842583	0.807617	0.0205121	2.42304		15.1047	0.842583	0.0546079	0.615238		396.205	13.7354	410.67	3.53009	413.248	3.37358	410.4	9.8415	413.466	3.42254	104.302
n5571-65	2016-05-01	427.189	238.548	34.6262	0.549707	0.558412	n/a	n/a	n/a	75605.4	{0.02}		0.501156	1.1802	0.0662299	0.897622	0.76057	0.0200411	2.55444		15.0989	0.897622	0.0548805	0.76625		407.358	17.0557	412.485	4.00856	413.402	3.59531	401.07	10.1416	413.48	3.64795	101.484
n5571-39	2016-05-01	972.302	652.186	81.579	0.713446	0.670764	n/a	n/a	n/a	157357	{0.01}		0.498433	1.01756	0.0663546	0.823431	0.809221	0.0207722	2.4162		15.0705	0.823431	0.0544796	0.597822		390.93	13.3605	410.641	3.44267	414.156	3.3039	415.551	9.93558	414.454	3.35265	105.941
n5571-42	2016-05-01	438.432	209.671	34.926	0.50585	0.478229	18.7033	15.6288	38.6305	24866.6	0.08		0.496914	1.19494	0.066343	0.903387	0.756012	0.0203128	3.06241		15.0732	0.903387	0.0543231	0.782157		384.47	17.4777	409.611	4.03574	414.086	3.6242	406.453	12.3192	414.462	3.67796	107.703
n5571-67	2016-05-01	412.918	327.717	35.7164	0.717455	0.793661	n/a	n/a	n/a	94788.9	{0.02}		0.513671	1.17867	0.0664925	0.886272	0.751923	0.0205122	2.44408		15.0393	0.886272	0.0560287	0.777041		453.508	17.1567	420.914	4.06955	414.989	3.56303	410.401	9.92695	414.485	3.6117	91.5066
n5571-53	2016-05-01	535.702	280.397	43.4096	0.523504	0.523419	18.7033	15.6288	38.6305	42996.3	0.04		0.505	1.13337	0.066516	0.901614	0.795516	0.0207377	2.50072		15.034	0.901614	0.0550635	0.686745		414.801	15.2746	415.081	3.86886	415.132	3.62593	414.868	10.2663	415.136	3.67623	100.08
n5571-37	2016-05-01	259.186	152.865	21.3791	0.625358	0.589787	18.7033	15.6288	38.6305	16030.2	0.12		0.500533	1.41044	0.0665073	0.869211	0.616269	0.020936	2.55158		15.036	0.869211	0.0545836	1.11077		395.205	24.7181	412.063	4.78845	415.079	3.49515	418.795	10.5732	415.333	3.55285	105.029
n5571-44	2016-05-01	1044.61	629.877	86.2863	0.63621	0.602977	18.7033	15.6288	38.6305	24107.3	0.08		0.499957	0.997155	0.0666447	0.850319	0.852746	0.0204497	2.43596		15.005	0.850319	0.0544085	0.52084		387.995	11.6523	411.674	3.38041	415.909	3.42579	409.164	9.86447	416.266	3.4742	107.195
n5571-17	2016-05-01	400.35	219.716	32.6278	0.542553	0.54881	n/a	n/a	n/a	55840.3	{0.03}		0.505428	1.15351	0.0667033	0.851743	0.738395	0.0202787	2.484		14.9918	0.851743	0.0549554	0.777888		410.411	17.3042	415.37	3.93996	416.263	3.43436	405.778	9.97657	416.339	3.48599	101.426
n5571-74	2016-05-01	532.532	169.447	41.1822	0.311762	0.318191	18.7033	15.6288	38.6305	35277.5	0.05		0.511819	1.11851	0.0668737	0.885608	0.791773	0.0212046	3.0912		14.9536	0.885608	0.0555085	0.683205		432.763	15.1489	419.671	3.85222	417.293	3.5795	424.111	12.9694	417.092	3.62822	96.4252
n5571-31	2016-05-01	521.618	282.432	42.5136	0.582395	0.541455	18.7033	15.6288	38.6305	20907.3	0.09		0.49955	1.15241	0.0668043	0.85787	0.744413	0.0204559	2.53222		14.9691	0.85787	0.0542341	0.769487		380.785	17.2072	411.397	3.90562	416.874	3.46399	409.287	10.2572	417.335	3.51712	109.478
n5571-68	2016-05-01	607.99	246.348	48.0876	0.428957	0.405184	n/a	n/a	n/a	102160	{0.02}		0.504079	1.06391	0.0669365	0.844398	0.793673	0.0209788	2.55854		14.9395	0.844398	0.0546179	0.647224		396.613	14.4453	414.46	3.62693	417.672	3.4159	419.642	10.6232	417.945	3.46701	105.31
n5571-36	2016-05-01	280.522	171.7	23.426	0.655266	0.612072	n/a	n/a	n/a	34259.6	{0.05}		0.503737	1.2711	0.0670866	0.915215	0.720019	0.0208609	2.57527		14.9061	0.915215	0.0544586	0.882086		390.063	19.6777	414.229	4.33279	418.579	3.71024	417.308	10.6338	418.949	3.7699	107.311
n5571-35	2016-05-01	909.472	511.31	75.3629	0.57811	0.562205	18.7033	15.6288	38.6305	61120.3	0.03		0.509996	1.00083	0.0673382	0.858234	0.857521	0.0210376	2.38519		14.8504	0.858234	0.0549293	0.514877		409.345	11.4764	418.446	3.43808	420.099	3.49141	420.806	9.9308	420.239	3.54004	102.627
n5571-54	2016-05-01	218.377	144.346	18.446	0.673554	0.660992	n/a	n/a	n/a	126994	{0.01}		0.50777	1.81374	0.0673356	1.19523	0.658985	0.0203485	2.67693		14.851	1.19523	0.0546917	1.36421		399.641	30.2816	416.949	6.22109	420.083	4.86268	407.16	10.7875	420.35	4.9439	105.115
n5571-61	2016-05-01	477.69	119.978	36.4746	0.254461	0.251163	n/a	n/a	n/a	60171.3	{0.03}		0.511378	1.1186	0.0673827	0.868498	0.776414	0.0209614	2.59471		14.8406	0.868498	0.0550418	0.704969		413.919	15.6804	419.375	3.85032	420.368	3.53536	419.297	10.7646	420.452	3.58757	101.558
n5571-75	2016-05-01	495.264	495.104	45.7788	0.98599	0.999677	n/a	n/a	n/a	78365.8	{0.02}		0.515704	1.09351	0.0674231	0.856363	0.783134	0.0212768	2.46045		14.8317	0.856363	0.0554742	0.68		431.384	15.0818	422.278	3.78484	420.612	3.48791	425.54	10.3581	420.47	3.53746	97.5028
n5571-66	2016-05-01	521.256	319.678	43.5441	0.635074	0.613284	18.7033	15.6288	38.6305	54114.8	0.03		0.506685	1.25266	0.0673593	0.880675	0.703046	0.0203867	2.51942		14.8458	0.880675	0.0545556	0.890821		394.056	19.8575	416.218	4.28642	420.226	3.58378	407.917	10.1716	420.565	3.64114	106.641
n5571-73b	2016-05-01	716.07	227.037	55.8519	0.349151	0.317059	18.7033	15.6288	38.6305	50035.9	0.04		0.506344	1.38085	0.0676467	1.25601	0.909592	0.0210652	4.12832		14.7827	1.25601	0.0542873	0.573745		382.988	12.8425	415.988	4.72397	421.962	5.13218	421.351	17.2073	422.467	5.20512	110.176
n5571-64	2016-05-01	581.776	309.51	48.1025	0.515168	0.53201	n/a	n/a	n/a	79465.2	{0.02}		0.518636	1.32756	0.0678138	1.16652	0.878697	0.0208772	3.60135		14.7463	1.16652	0.0554681	0.63375		431.14	14.0611	424.24	4.61402	422.971	4.77745	417.631	14.8806	422.863	4.84146	98.1054
n5571-05	2016-05-01	708.565	338.582	57.5413	0.515234	0.477841	18.7033	15.6288	38.6305	53398.5	0.04		0.506529	1.01412	0.0677248	0.842333	0.830604	0.0205295	2.41253		14.7656	0.842333	0.0542445	0.564727		381.214	12.6453	416.113	3.46807	422.433	3.44514	410.744	9.80696	422.968	3.49765	110.813
n5571-23	2016-05-01	525.475	194.591	41.7038	0.395849	0.370315	18.7033	15.6288	38.6305	37805.7	0.05		0.510379	1.32096	0.0679057	0.846817	0.641061	0.0209461	2.46687		14.7263	0.846817	0.0545112	1.01382		392.228	22.5875	418.704	4.54253	423.526	3.47215	418.994	10.2271	423.935	3.53213	107.98
n5571-41	2016-05-01	137.418	123.468	12.4672	0.847753	0.898485	n/a	n/a	n/a	53838.9	{0.03}		0.523817	1.55157	0.0680957	0.924941	0.596134	0.0209574	2.71898		14.6852	0.924941	0.0557903	1.24573		444.031	27.4619	427.698	5.4301	424.673	3.80251	419.218	11.2779	424.413	3.86797	95.6403
n5571-40	2016-05-01	851.442	647.219	75.0551	0.798295	0.760145	18.7033	15.6288	38.6305	60675.4	0.03		0.515986	0.987357	0.0682937	0.842621	0.853411	0.0211993	2.59767		14.6426	0.842621	0.0547969	0.514648		403.944	11.4822	422.466	3.41804	425.868	3.47342	424.006	10.8966	426.157	3.52399	105.427
n5571-29	2016-05-01	1773.64	1655.25	162.997	0.967527	0.933255	18.7033	15.6288	38.6305	73776.1	0.03		0.518152	0.89524	0.0685287	0.818062	0.913792	0.021016	2.33652		14.5924	0.818062	0.0548383	0.363631		405.635	8.11897	423.916	3.10725	427.285	3.38302	420.378	9.71844	427.572	3.43107	105.337
n5571-46	2016-05-01	168.006	58.6105	13.9821	0.340522	0.348861	n/a	n/a	n/a	45275.9	{0.04}		0.552494	1.4339	0.0714586	0.92569	0.645576	0.0222396	2.73453		13.9941	0.92569	0.0560753	1.09506		455.353	24.1182	446.629	5.19465	444.937	3.98105	444.587	12.021	444.79	4.04961	97.7127
n5571-48	2016-05-01	341.957	254.793	33.9784	0.769708	0.745103	18.7033	15.6288	38.6305	19505.6	0.1		0.599125	1.23979	0.0775576	0.851188	0.686557	0.0234351	2.59418		12.8936	0.851188	0.0560263	0.901423		453.409	19.8864	476.678	4.72742	481.528	3.95058	468.21	12.003	481.961	4.02399	106.202
n5571-16	2016-05-01	824.018	356.468	76.0962	0.440496	0.432598	18.7033	15.6288	38.6305	53014.9	0.04		0.603647	0.958877	0.0776877	0.826558	0.862006	0.023768	2.39155		12.8721	0.826558	0.0563547	0.486053		466.369	10.7295	479.546	3.67157	482.306	3.8422	474.784	11.2193	482.553	3.90609	103.417
n5571-52	2016-05-01	849.663	324.181	81.0356	0.378906	0.381541	18.7033	15.6288	38.6305	67612.1	0.03		0.640061	0.979495	0.081364	0.842063	0.859691	0.0245522	2.88055		12.2904	0.842063	0.0570542	0.50034		493.629	10.9922	502.344	3.88888	504.259	4.08564	490.26	13.9475	504.434	4.15688	102.154
n5571-15	2016-05-01	960.211	329.807	91.3991	0.346914	0.343474	18.7033	15.6288	38.6305	79893.2	0.02		0.645131	0.978453	0.0818609	0.857493	0.876377	0.025174	2.40347		12.2158	0.857493	0.0571571	0.471249		497.601	10.3481	505.478	3.90348	507.221	4.18403	502.524	11.9256	507.38	4.25679	101.933
n5571-06	2016-05-01	76.6157	41.2137	8.82359	0.534144	0.537927	n/a	n/a	n/a	>1e6	{0.00}		0.769727	1.94905	0.0939914	0.997461	0.511767	0.0289869	2.81161		10.6393	0.997461	0.0593946	1.67448		581.591	35.9562	579.606	8.64432	579.1	5.52681	577.559	16.0026	579.05	5.68151	99.5717
n5571-33	2016-05-01	280.965	53.3565	30.7185	0.201423	0.189904	n/a	n/a	n/a	81760.2	{0.02}		0.805483	1.16763	0.0973906	0.93327	0.799283	0.0321203	4.78149		10.2679	0.93327	0.0599844	0.701694		603.011	15.1124	599.917	5.30314	599.099	5.34147	639.014	30.0541	599.016	5.45985	99.3512
n5571-62	2016-05-01	257.249	111.737	30.8156	0.445027	0.434354	18.7033	15.6288	38.6305	41283.6	0.05		0.82828	1.19825	0.100456	0.904732	0.755045	0.0306796	3.64008		9.95464	0.904732	0.0598001	0.785659		596.348	16.93	612.658	5.52705	617.079	5.32623	610.782	21.8885	617.525	5.45445	103.476
n5571-19	2016-05-01	119.713	113.051	16.9089	0.905893	0.944348	n/a	n/a	n/a	24682.3	{0.08}		0.889168	1.7613	0.105184	0.983752	0.558536	0.0313571	2.58063		9.50714	0.983752	0.0613102	1.46097		650.133	31.0611	645.922	8.45247	644.718	6.03841	624.063	15.8524	644.592	6.21783	99.1672
n5571-32	2016-05-01	230.928	114.109	29.482	0.476144	0.494133	n/a	n/a	n/a	97259	{0.02}		0.894851	1.1517	0.105376	0.884725	0.768189	0.0319786	2.533		9.48982	0.884725	0.0615896	0.737345		659.889	15.7273	648.972	5.5377	645.838	5.43928	636.24	15.8587	645.509	5.57342	97.8707
n5571-45	2016-05-01	337.724	37.0022	39.508	0.114025	0.109563	n/a	n/a	n/a	61601.3	{0.03}		0.89896	1.06207	0.106788	0.867015	0.816346	0.0335415	3.70611		9.36433	0.867015	0.0610542	0.613413		641.145	13.1354	651.172	5.11801	654.068	5.39492	666.827	24.2955	654.373	5.53195	102.016
n5571-13	2016-05-01	290.024	117.068	36.8273	0.419467	0.403649	n/a	n/a	n/a	110810	{0.02}		0.896701	1.10823	0.107289	0.855774	0.772198	0.0326703	2.53606		9.32061	0.855774	0.0606165	0.704151		625.653	15.108	649.963	5.33396	656.985	5.34751	649.781	16.2103	657.725	5.49132	105.008
n5571-26	2016-05-01	398.385	171.619	52.4074	0.424357	0.430787	18.7033	15.6288	38.6305	38360.6	0.05		0.942055	1.02669	0.110417	0.846963	0.824943	0.0331965	2.55878		9.05661	0.846963	0.0618786	0.580303		669.917	12.3703	673.957	5.06954	675.167	5.43143	660.079	16.6103	675.296	5.57116	100.784
n5571-08	2016-05-01	105.93	78.0862	15.125	0.747487	0.737149	n/a	n/a	n/a	61409.9	{0.03}		0.944283	1.44473	0.110932	0.925627	0.640694	0.0339178	2.5744		9.01456	0.925627	0.061737	1.10926		665.011	23.5812	675.122	7.14967	678.156	5.96106	674.184	17.0627	678.483	6.13842	101.977
n5571-07	2016-05-01	429.945	149.175	55.7294	0.344931	0.346964	n/a	n/a	n/a	98516	{0.02}		0.949554	0.997195	0.111013	0.850328	0.852721	0.0337781	2.43402		9.00792	0.850328	0.0620358	0.520902		675.344	11.0985	677.87	4.94369	678.631	5.47956	671.453	16.0684	678.713	5.62171	100.487
n5571-51	2016-05-01	248.389	20.9365	44.2897	0.0848549	0.084289	18.7033	15.6288	38.6305	51644.3	0.04		1.60001	1.08432	0.162537	0.928052	0.855883	0.0494257	3.00544		6.15245	0.928052	0.0713952	0.560778		968.75	11.4011	970.214	6.79811	970.86	8.36985	975.1	28.5901	970.951	8.73839	100.218
n5571-04	2016-05-01	142.506	28.9401	26.2906	0.200181	0.203081	n/a	n/a	n/a	57974.2	{0.03}		1.60416	1.14185	0.163036	0.903616	0.791358	0.0483456	3.82023		6.13363	0.903616	0.0713613	0.698076		967.782	14.1819	971.833	7.16725	973.625	8.17085	954.287	35.5774	973.88	8.54682	100.604
n5571-12	2016-05-01	291.917	31.66	52.8538	0.103544	0.108456	18.7033	15.6288	38.6305	41417.9	0.05		1.6152	0.996485	0.164273	0.84705	0.850037	0.0467536	2.80543		6.08744	0.84705	0.0713113	0.524871		966.351	10.6775	976.128	6.26847	980.478	7.70899	923.568	25.3112	981.094	8.05941	101.462
n5571-60	2016-05-01	182.533	64.0202	35.3555	0.347252	0.350733	n/a	n/a	n/a	42597	{0.04}		1.62976	1.11773	0.164615	0.909766	0.813942	0.0492078	2.64508		6.07477	0.909766	0.0718044	0.64934		980.402	13.1705	981.765	7.058	982.375	8.29498	970.903	25.0586	982.462	8.67742	100.201
n5571-43	2016-05-01	370.237	209.487	75.9198	0.568435	0.565818	n/a	n/a	n/a	177686	{0.01}		1.62607	0.952656	0.165454	0.84572	0.887749	0.0491495	2.96615		6.04398	0.84572	0.0712788	0.438534		965.42	8.92746	980.34	6.00735	987.015	7.7444	969.78	28.0664	987.973	8.10384	102.237
n5571-28	2016-05-01	155.144	26.1028	28.8304	0.160538	0.168248	n/a	n/a	n/a	62291.1	{0.03}		1.64575	1.12073	0.165879	0.90429	0.806874	0.047637	2.78225		6.0285	0.90429	0.0719567	0.662042		984.716	13.4182	987.921	7.10337	989.364	8.29932	940.62	25.5546	989.572	8.68859	100.472
n5571-71	2016-05-01	110.129	106.794	24.6687	0.949825	0.969719	n/a	n/a	n/a	49392	{0.04}		1.62683	1.46908	0.166042	1.14584	0.77997	0.0475998	2.83736		6.02259	1.14584	0.0710596	0.919378		959.129	18.6756	980.633	9.28046	990.264	10.5269	939.902	26.0411	991.649	11.0386	103.246
n5571-78	30/04/2016	207.526	52.1978	39.6869	0.266232	0.251524	n/a	n/a	n/a	79773.9	{0.02}		1.62147	1.10038	0.166755	0.923812	0.839536	0.0505868	2.94238		5.99684	0.923812	0.0705228	0.597842		943.613	12.1988	978.56	6.93458	994.205	8.51701	997.451	28.6162	996.455	8.93767	105.362
n5571-09	2016-05-01	159.861	55.7634	32.9287	0.349708	0.348824	n/a	n/a	n/a	163532	{0.01}		1.76714	1.07554	0.175072	0.872384	0.811114	0.0518748	2.52576		5.71194	0.872384	0.0732074	0.629069		1019.7	12.685	1033.47	6.99828	1039.99	8.38417	1022.22	25.1611	1040.98	8.81842	101.99
n5571-10	2016-05-01	235.002	73.7626	51.8445	0.305548	0.313881	n/a	n/a	n/a	179686	{0.01}		2.05841	1.30634	0.18713	1.0441	0.799258	0.0591107	2.57204		5.34387	1.0441	0.0797786	0.785092		1191.52	15.4182	1135.09	8.9668	1105.81	10.6185	1160.78	28.9938	1101.02	11.1932	92.8068
n5571-27	2016-05-01	374.909	179.143	112.995	0.450643	0.477831	18.7033	15.6288	38.6305	28033	0.07		3.07607	0.937895	0.24576	0.869625	0.92721	0.0697401	2.44847		4.06901	0.869625	0.0907788	0.351282		1441.97	6.67906	1426.75	7.21241	1416.57	11.0688	1362.62	32.2378	>1200		98.2388
n5571-34	2016-05-01	306.837	285.089	215.543	0.817734	0.929123	18.7033	15.6288	38.6305	71135.7	0.03		12.8355	0.953779	0.49067	0.935777	0.981126	0.127763	2.79336		2.03803	0.935777	0.189724	0.18443		2739.77	3.03065	2667.65	9.02452	2573.57	19.887	2430.24	63.8621	>1200		93.934
Sample FR15-36 Chloritic & Carbonate Rocks (Dc): N 67027´44.84´´ W 150051´47.21´´
n5564-71	26/04/2016	3322	4679.97	283.01	1.21545	1.40878	18.7033	15.6288	38.6305	470.036	3.98		0.447297	4.68157	0.0605772	1.02708	0.219387	0.0151701	2.6517		16.5079	1.02708	0.0535532	4.56752		352.306	100.031	375.385	14.7986	379.135	3.78282	304.319	8.00761	379.441	4.34312	107.615
n5564-09	25/04/2016	688.593	554.836	55.3781	0.779825	0.805753	n/a	n/a	n/a	125774	{0.01}		0.464109	1.20452	0.0616892	1.01448	0.84223	0.0190714	2.35219		16.2103	1.01448	0.0545644	0.649381		394.419	14.4988	387.112	3.88438	385.89	3.80105	381.846	8.89547	385.789	3.84779	97.8377
n5564-35	25/04/2016	209.709	120.621	16.0552	0.769431	0.575185	18.7033	15.6288	38.6305	8972.78	0.21		0.446883	1.95499	0.0622147	1.07626	0.550518	0.0193047	2.66566		16.0734	1.07626	0.0520954	1.63207		289.601	36.8682	375.094	6.14964	389.08	4.06492	386.473	10.2016	390.224	4.13622	134.35
n5564-12	25/04/2016	591.351	229.298	43.428	0.373873	0.387753	n/a	n/a	n/a	50098	{0.04}		0.471971	1.27249	0.0624694	1.04073	0.817871	0.0194612	2.35754		16.0078	1.04073	0.0547957	0.732193		403.895	16.3113	392.549	4.15133	390.626	3.94585	389.576	9.09441	390.466	3.99538	96.7146
n5564-30	25/04/2016	250.457	139.969	19.2925	0.525646	0.558856	n/a	n/a	n/a	38884	{0.05}		0.475905	1.5819	0.0625873	1.07332	0.678499	0.0196658	2.60986		15.9777	1.07332	0.0551484	1.16207		418.245	25.7469	395.26	5.19256	391.341	4.07668	393.631	10.1713	391.014	4.13347	93.5674
n5564-51	26/04/2016	578.023	344.334	45.0028	0.645241	0.59571	n/a	n/a	n/a	99494.1	{0.02}		0.465523	1.2909	0.062514	1.03138	0.798958	0.020087	2.29154		15.9964	1.03138	0.0540085	0.776333		371.404	17.388	388.091	4.17219	390.897	3.913	401.979	9.11844	391.129	3.96669	105.248
n5564-26	25/04/2016	437.093	196.388	32.6208	0.462768	0.449305	18.7033	15.6288	38.6305	20614.5	0.09		0.466538	1.36675	0.0627435	1.032	0.755071	0.0189272	2.3914		15.9379	1.032	0.0539284	0.896103		368.059	20.0658	388.795	4.42445	392.289	3.92888	378.985	8.97661	392.577	3.98364	106.583
n5564-68	26/04/2016	125.272	73.295	9.80601	0.657076	0.585086	n/a	n/a	n/a	28459.2	{0.07}		0.467268	2.00348	0.0629905	1.15823	0.578111	0.0203359	3.16196		15.8754	1.15823	0.053801	1.63475		362.727	36.4539	389.3	6.49921	393.787	4.42597	406.911	12.7337	394.16	4.50394	108.563
n5564-44	26/04/2016	320.843	161.698	24.4975	0.501659	0.503978	n/a	n/a	n/a	43032.1	{0.04}		0.474191	1.44175	0.0630279	1.04742	0.726494	0.0196173	2.41934		15.866	1.04742	0.0545656	0.990728		394.467	22.0678	394.08	4.71984	394.014	4.00463	392.669	9.40613	394.008	4.06087	99.8851
n5564-67	26/04/2016	377.539	235.989	29.8208	0.691141	0.625072	18.7033	15.6288	38.6305	15950	0.12		0.467893	1.55047	0.0630578	1.12023	0.722512	0.0200555	2.43832		15.8585	1.12023	0.0538153	1.07193		363.33	23.9936	389.732	5.03059	394.195	4.28501	401.354	9.68747	394.563	4.34615	108.495
n5564-08	25/04/2016	926.041	501.296	71.7282	0.545813	0.541332	18.7033	15.6288	38.6305	2312.76	0.81		0.475839	1.39823	0.0633256	1.03833	0.742604	0.0197294	2.56924		15.7914	1.03833	0.0544979	0.936439		391.681	20.8765	395.214	4.58787	395.819	3.98751	394.891	10.0447	395.869	4.05486	101.057
n5564-14	25/04/2016	231.945	120.569	17.9986	0.572374	0.519815	n/a	n/a	n/a	46417.3	{0.04}		0.473265	1.53261	0.0636696	1.06522	0.695038	0.0201924	2.47612		15.7061	1.06522	0.0539102	1.1019		367.299	24.6423	393.442	5.01136	397.904	4.1117	404.068	9.90342	398.276	4.17573	108.332
n5564-38	26/04/2016	262.958	150.575	20.7061	0.612589	0.572622	n/a	n/a	n/a	63724.1	{0.03}		0.475942	1.6184	0.0637186	1.19694	0.739587	0.0202095	3.10089		15.694	1.19694	0.0541734	1.08928		378.267	24.3153	395.285	5.31294	398.201	4.62368	404.407	12.4118	398.445	4.69121	105.27
n5564-56	26/04/2016	400.328	227.717	31.7017	0.558351	0.568827	18.7033	15.6288	38.6305	22714.5	0.08		0.486509	1.48581	0.0642596	1.14441	0.770227	0.0200432	2.4323		15.5619	1.14441	0.05491	0.947605		408.561	21.0617	402.529	4.94965	401.479	4.45595	401.111	9.65774	401.391	4.51453	98.2664
n5564-59	26/04/2016	561.852	356.483	45.0509	0.753167	0.634479	18.7033	15.6288	38.6305	21041.8	0.09		0.470429	1.37119	0.0642444	1.0176	0.742133	0.0197431	2.32396		15.5656	1.0176	0.0531078	0.919043		333.403	20.7023	391.485	4.46408	401.386	3.96118	395.165	9.09222	402.207	4.02324	120.391
n5564-25	25/04/2016	177.395	98.5479	14.2707	0.515317	0.555527	n/a	n/a	n/a	>1e6	{0.00}		0.502818	1.8185	0.0652511	1.13344	0.623279	0.0207872	2.97779		15.3254	1.13344	0.0558884	1.42207		447.939	31.2904	413.608	6.19688	407.481	4.47715	415.848	12.2528	406.963	4.54559	90.968
n5564-37	25/04/2016	340.229	323.453	30.3313	1.00478	0.950693	18.7033	15.6288	38.6305	13065.9	0.14		0.495276	1.52771	0.0659339	1.05414	0.690015	0.0206415	2.42473		15.1667	1.05414	0.0544801	1.10575		390.947	24.6254	408.5	5.15108	411.612	4.20473	412.963	9.90922	411.873	4.26799	105.286
n5564-20	25/04/2016	459.107	230.511	36.8218	0.488883	0.502085	n/a	n/a	n/a	84959.4	{0.02}		0.504633	1.27839	0.0661031	1.03539	0.809915	0.0207931	2.31251		15.1279	1.03539	0.0553672	0.749836		427.08	16.6351	414.834	4.36286	412.635	4.13984	415.964	9.51867	412.449	4.19553	96.6179
n5564-17	25/04/2016	381.981	296.588	32.6848	0.761609	0.776446	n/a	n/a	n/a	70225.4	{0.03}		0.502024	1.32879	0.0660904	1.03824	0.781343	0.0203945	2.2936		15.1308	1.03824	0.0550915	0.829298		415.939	18.4235	413.072	4.51959	412.558	4.15049	408.071	9.26355	412.515	4.20882	99.1872
n5564-74	26/04/2016	619.723	302.083	50.0364	0.504269	0.487448	18.7033	15.6288	38.6305	28586.2	0.07		0.505597	1.27982	0.0667493	1.0353	0.808944	0.0211791	2.65147		14.9814	1.0353	0.0549359	0.752388		409.617	16.7422	415.484	4.3733	416.541	4.17744	423.606	11.1119	416.63	4.23567	101.69
n5564-48	26/04/2016	631.133	260.066	49.8911	0.45957	0.412062	18.7033	15.6288	38.6305	26576.3	0.07		0.498649	1.27579	0.0667284	1.01944	0.799062	0.0211261	2.45266		14.9861	1.01944	0.0541979	0.767066		379.284	17.1578	410.787	4.31944	416.415	4.11219	422.558	10.2537	416.889	4.17339	109.79
n5564-80	25/04/2016	255.728	120.378	20.4314	0.516179	0.470726	18.7033	15.6288	38.6305	16188.9	0.12		0.496831	1.63464	0.0667251	1.06453	0.651232	0.0203231	2.84447		14.9869	1.06453	0.054003	1.24049		371.174	27.6963	409.555	5.52419	416.395	4.29395	406.656	11.4484	416.971	4.36491	112.183
n5564-60	26/04/2016	551.159	344.968	46.2886	0.720593	0.625896	18.7033	15.6288	38.6305	5854.88	0.32		0.498801	1.40193	0.0668921	1.01729	0.725637	0.021528	2.40551		14.9494	1.01729	0.0540818	0.964636		374.456	21.5659	410.89	4.74847	417.404	4.11298	430.511	10.2439	417.953	4.1763	111.469
n5564-33	25/04/2016	976.408	775.329	85.6178	0.839846	0.794062	n/a	n/a	n/a	189703	{0.01}		0.50683	1.14052	0.0671413	1.02226	0.896311	0.0212443	3.02164		14.894	1.02226	0.0547484	0.505737		401.963	11.288	416.315	3.90271	418.91	4.14751	424.898	12.7009	419.131	4.20533	104.216
n5564-78	26/04/2016	242.436	161.227	20.7155	0.588153	0.665032	n/a	n/a	n/a	30337.1	{0.06}		0.527602	1.61897	0.0675762	1.09768	0.67801	0.0211186	2.50596		14.7981	1.09768	0.0566255	1.19003		476.977	26.0956	430.217	5.69354	421.536	4.48062	422.41	10.4728	420.791	4.54561	88.3766
n5564-66	26/04/2016	162.609	43.6956	12.8563	0.266241	0.268716	n/a	n/a	n/a	16028.2	{0.12}		0.534354	1.7308	0.0691276	1.12119	0.64779	0.0225498	3.09844		14.466	1.12119	0.056063	1.31855		454.862	28.9986	434.695	6.13892	430.898	4.67496	450.719	13.806	430.57	4.7505	94.7315
n5564-75	26/04/2016	281.133	119.535	23.1662	0.422808	0.425192	n/a	n/a	n/a	23079.9	{0.08}		0.531657	1.49478	0.0692458	1.08819	0.727991	0.0218755	2.67221		14.4413	1.08819	0.0556849	1.0248		439.827	22.6421	432.909	5.28209	431.61	4.54454	437.387	11.559	431.498	4.61413	98.1318
n5564-22	25/04/2016	175.126	59.2783	14.2642	0.335451	0.33849	n/a	n/a	n/a	20109.1	{0.09}		0.539392	1.59269	0.0700504	1.07496	0.674934	0.0221236	2.64538		14.2754	1.07496	0.0558461	1.17521		446.256	25.9099	438.024	5.6824	436.459	4.53806	442.293	11.5699	436.323	4.61196	97.8046
n5564-23	25/04/2016	182.968	37.9468	15.194	0.22788	0.207396	n/a	n/a	n/a	33142.5	{0.06}		0.564981	1.57541	0.0741148	1.10631	0.702236	0.0232857	2.85552		13.4926	1.10631	0.0552876	1.1216		423.872	24.833	454.763	5.79142	460.898	4.92282	465.26	13.1296	461.44	5.01307	108.735
n5564-45	26/04/2016	136.742	41.7111	12.0277	0.328026	0.305035	18.7033	15.6288	38.6305	4834.23	0.39		0.586352	2.36982	0.0766034	1.09198	0.460787	0.0232866	3.51527		13.0542	1.09198	0.0555148	2.10324		433.015	46.1831	468.535	8.93332	475.817	5.01066	465.278	16.1625	476.463	5.12124	109.885
n5564-42	26/04/2016	274.62	90.0963	25.5512	0.358758	0.328076	18.7033	15.6288	38.6305	22285.9	0.08		0.621486	1.48935	0.0803395	1.06123	0.712542	0.0249797	2.65226		12.4472	1.06123	0.0561049	1.04497		456.521	23.0182	490.778	5.81283	498.149	5.0894	498.692	13.0606	498.817	5.18683	109.119
n5564-65	26/04/2016	495.723	86.512	44.6692	0.194172	0.174517	18.7033	15.6288	38.6305	17255.4	0.11		0.627288	1.29079	0.0811366	1.03544	0.802176	0.0253438	2.69057		12.3249	1.03544	0.0560724	0.770712		455.235	17.0127	494.405	5.06489	502.903	5.01127	505.871	13.4374	503.676	5.10512	110.471
n5564-41	26/04/2016	658.413	214.173	62.3298	0.32903	0.325287	18.7033	15.6288	38.6305	48389.2	0.04		0.643846	1.23304	0.0818767	1.07057	0.868233	0.0249639	2.49661		12.2135	1.07057	0.0570322	0.611782		492.779	13.4322	504.685	4.91564	507.315	5.22507	498.38	12.2867	507.556	5.31643	102.95
n5564-27	25/04/2016	151.316	109.769	17.503	0.690415	0.725433	n/a	n/a	n/a	60947.9	{0.03}		0.738389	1.51673	0.0901493	1.06992	0.705416	0.0278012	2.68152		11.0927	1.06992	0.0594048	1.07505		581.965	23.1765	561.465	6.56264	556.42	5.7061	554.254	14.6552	555.932	5.82445	95.6105
n5564-01	25/04/2016	354.652	235.507	44.2708	0.616573	0.664052	n/a	n/a	n/a	139404	{0.01}		0.832801	1.2627	0.0988912	1.04633	0.828648	0.0299639	2.29242		10.1121	1.04633	0.0610777	0.70682		641.97	15.124	615.165	5.84257	607.908	6.07288	596.741	13.4753	607.171	6.20221	94.694
n5564-15	25/04/2016	237.302	199.142	32.9887	0.82935	0.839193	n/a	n/a	n/a	62529.5	{0.03}		0.891726	1.41438	0.105132	1.08198	0.764988	0.0326696	2.34663		9.51184	1.08198	0.0615169	0.910922		657.357	19.4151	647.296	6.79235	644.415	6.63871	649.769	14.9996	644.114	6.80176	98.0313
n5564-05	25/04/2016	268.557	122.45	33.8968	0.445096	0.455954	n/a	n/a	n/a	50187.3	{0.04}		0.888888	1.29648	0.105284	1.03952	0.801798	0.0317747	2.3674		9.49815	1.03952	0.0612329	0.77477		647.425	16.5554	645.772	6.21391	645.299	6.38633	632.245	14.7307	645.25	6.54269	99.6716
n5564-62	26/04/2016	288.441	36.7136	33.431	0.140455	0.127283	18.7033	15.6288	38.6305	29062.2	0.06		0.868256	1.32022	0.105416	1.03273	0.782243	0.0329135	2.94163		9.48625	1.03273	0.0597367	0.82246		594.051	17.7255	634.62	6.24917	646.069	6.35183	654.543	18.9369	647.253	6.5191	108.757
n5564-32	25/04/2016	499.751	140.437	61.2043	0.280762	0.281014	n/a	n/a	n/a	172973	{0.01}		0.906315	1.2625	0.106519	1.05354	0.834489	0.0333692	2.57971		9.38797	1.05354	0.0617091	0.695666		664.044	14.8323	655.097	6.11296	652.502	6.54122	663.457	16.8304	652.228	6.69917	98.2619
n5564-69	26/04/2016	288.013	137.253	37.4542	0.464192	0.47655	n/a	n/a	n/a	33673.2	{0.06}		0.921975	1.28512	0.107402	1.03587	0.806044	0.0334791	2.4357		9.3108	1.03587	0.0622594	0.760608		683.031	16.1594	663.404	6.27897	657.643	6.47959	665.606	15.9418	657.031	6.63729	96.2831
n5564-34	25/04/2016	622.959	101.222	75.0636	0.168824	0.162486	18.7033	15.6288	38.6305	35559.6	0.05		0.912973	1.15612	0.108428	1.0141	0.877159	0.033512	2.99505		9.22267	1.0141	0.061068	0.55517		641.629	11.8919	658.637	5.61803	663.615	6.39812	666.249	19.6197	664.139	6.55924	103.426
n5564-24	25/04/2016	233.031	142.003	31.5465	0.638939	0.609375	n/a	n/a	n/a	35933.2	{0.05}		0.909563	1.39285	0.108439	1.15259	0.827507	0.0333762	2.39592		9.22176	1.15259	0.0608339	0.782022		633.365	16.7485	656.826	6.75892	663.677	7.27299	663.593	15.635	664.404	7.46427	104.786
n5564-18	25/04/2016	310.005	73.302	38.8663	0.24781	0.236454	18.7033	15.6288	38.6305	38362.5	0.05		0.944886	1.29084	0.109981	1.08221	0.838379	0.0361149	5.22885		9.09249	1.08221	0.0623104	0.703621		684.78	14.9501	675.436	6.38781	672.637	6.91616	717.09	36.8047	672.338	7.08774	98.2268
n5564-58	26/04/2016	268.46	172.353	38.2417	0.650449	0.642004	18.7033	15.6288	38.6305	43838.4	0.04		0.971568	1.32693	0.112819	1.03455	0.779658	0.0351754	2.32576		8.86375	1.03455	0.0624582	0.83093		689.836	17.6254	689.272	6.66136	689.099	6.76481	698.755	15.9673	689.08	6.94641	99.8932
n5564-03	25/04/2016	121.177	97.6883	25.0879	0.77213	0.80616	n/a	n/a	n/a	33387	{0.06}		1.55472	1.43754	0.157758	1.13572	0.790044	0.0471387	2.58973		6.33884	1.13572	0.0714762	0.881287		971.065	17.8736	952.373	8.9221	944.303	9.98388	931.003	23.5499	943.183	10.4066	97.2441
n5564-02	25/04/2016	174.403	28.8464	31.0855	0.157732	0.165401	n/a	n/a	n/a	110601	{0.02}		1.57773	1.27626	0.15891	1.04645	0.819939	0.0476819	3.23055		6.29285	1.04645	0.0720078	0.730594		986.161	14.7978	961.476	7.96279	950.719	9.25662	941.486	29.6958	949.215	9.64624	96.406
n5564-77	26/04/2016	273.85	64.1251	49.6777	0.235731	0.234162	18.7033	15.6288	38.6305	21761.2	0.09		1.55154	1.2325	0.15876	1.04573	0.848463	0.0486515	7.55211		6.29882	1.04573	0.0708795	0.652308		953.941	13.2842	951.106	7.63855	949.882	9.24267	960.183	70.6949	949.713	9.63289	99.5745
n5564-43	26/04/2016	364.805	17.081	63.5966	0.0499775	0.0468222	n/a	n/a	n/a	127970	{0.01}		1.57743	1.16023	0.160443	1.0406	0.896893	0.0522642	3.77227		6.23275	1.0406	0.0713065	0.513107		966.214	10.4392	961.358	7.23574	959.237	9.28134	1029.7	37.8346	958.939	9.67703	99.2779
n5564-29	25/04/2016	242.004	51.169	43.9299	0.19581	0.211439	18.7033	15.6288	38.6305	27546.7	0.07		1.5766	1.1972	0.160525	1.03226	0.862226	0.0452426	3.79659		6.22955	1.03226	0.0712321	0.606408		964.08	12.334	961.029	7.46561	959.696	9.21095	894.371	33.1881	959.51	9.60515	99.5452
n5564-07	25/04/2016	394.503	48.8419	70.8308	0.122319	0.123806	18.7033	15.6288	38.6305	77095	0.02		1.59662	1.14037	0.161939	1.03395	0.90668	0.0486707	2.50882		6.17517	1.03395	0.0715073	0.481028		971.952	9.78003	968.891	7.14489	967.542	9.29604	960.553	23.5211	967.353	9.6945	99.5463
n5564-31	25/04/2016	353.261	89.9245	65.755	0.256275	0.254555	18.7033	15.6288	38.6305	40040.6	0.05		1.59464	1.27599	0.161989	1.07253	0.840548	0.0494297	2.39526		6.17326	1.07253	0.0713965	0.691249		968.786	14.0417	968.116	7.99411	967.82	9.64572	975.177	22.7907	967.779	10.0684	99.9003
n5564-11	25/04/2016	254.757	25.5503	45.5837	0.0989719	0.100293	18.7033	15.6288	38.6305	46133.4	0.04		1.57567	1.31226	0.162823	1.02994	0.784853	0.0466605	2.83296		6.14165	1.02994	0.0701857	0.813187		933.791	16.5946	960.663	8.18418	972.444	9.30342	921.771	25.5108	974.094	9.74091	104.139
n5564-28	25/04/2016	243.297	30.043	43.9743	0.123721	0.123483	18.7033	15.6288	38.6305	69273.3	0.03		1.60174	1.19891	0.163082	1.03465	0.862992	0.0489502	2.61528		6.13189	1.03465	0.0712335	0.605711		964.122	12.3198	970.888	7.52232	973.88	9.35884	965.94	24.6529	974.302	9.77543	101.012
n5564-73	26/04/2016	114.307	65.0481	23.1345	0.598928	0.569063	18.7033	15.6288	38.6305	16165.8	0.12		1.56941	1.49026	0.163016	1.09892	0.737398	0.0491864	2.52012		6.13437	1.09892	0.0698241	1.00661		923.185	20.5494	958.193	9.28495	973.515	9.93714	970.49	23.8656	975.66	10.413	105.452
n5564-13	25/04/2016	156.639	42.5052	29.4907	0.269039	0.271358	18.7033	15.6288	38.6305	20197.9	0.09		1.59633	1.35917	0.163766	1.08311	0.796895	0.0476422	5.35939		6.10626	1.08311	0.0706962	0.821098		948.641	16.7169	968.775	8.52092	977.674	9.83292	940.72	49.2017	978.928	10.2867	103.06
n5564-63	26/04/2016	392.296	29.5798	71.1444	0.0738676	0.0754018	18.7033	15.6288	38.6305	27495	0.07		1.62952	1.14933	0.165927	1.0236	0.890612	0.0478514	2.99873		6.02674	1.0236	0.0712264	0.522672		963.917	10.6369	981.674	7.25784	989.632	9.3975	944.756	27.6598	990.767	9.82981	102.668
n5564-72	26/04/2016	933.585	82.2739	171.355	0.0892886	0.0881268	18.7033	15.6288	38.6305	48178	0.04		1.63655	1.07779	0.167354	1.02465	0.950687	0.0490316	2.43076		5.97535	1.02465	0.0709236	0.334279		955.212	6.82043	984.384	6.81578	997.517	9.47644	967.507	22.9508	999.4	9.9215	104.429
n5564-06	25/04/2016	183.802	116.967	42.458	0.6457	0.636377	18.7033	15.6288	38.6305	25891.7	0.07		1.88198	1.25104	0.182476	1.05505	0.843342	0.0547994	2.3174		5.48018	1.05505	0.0748013	0.672279		1063.17	13.4642	1074.76	8.32922	1080.49	10.5041	1078.33	24.3198	1081.38	11.0669	101.629
n5564-40	26/04/2016	208.045	107.147	47.0472	0.536834	0.515015	18.7033	15.6288	38.6305	22690.3	0.08		1.88499	1.23836	0.183788	1.04837	0.846583	0.055687	2.36531		5.44105	1.04837	0.0743859	0.659124		1051.96	13.2241	1075.82	8.24904	1087.64	10.501	1095.34	25.2029	1089.48	11.0796	103.392
n5564-47	26/04/2016	142.599	50.7181	33.15	0.357913	0.35567	n/a	n/a	n/a	57851.2	{0.03}		2.10972	1.38127	0.196298	1.04865	0.759198	0.0586812	2.43805		5.0943	1.04865	0.0779484	0.89901		1145.56	17.761	1151.98	9.5599	1155.4	11.102	1152.58	27.2959	1155.98	11.7975	100.859
n5564-46	26/04/2016	112.618	57.8249	28.0551	0.524021	0.513462	n/a	n/a	n/a	46324.7	{0.04}		2.20913	1.4953	0.20144	1.08887	0.728193	0.0616516	2.44379		4.96425	1.08887	0.0795377	1.02484		1185.55	20.1132	1183.94	10.506	1183.05	11.7797	1209.21	28.6637	1182.9	12.5524	99.7895
n5564-57	26/04/2016	101.706	40.0762	26.6338	0.402728	0.394042	18.7033	15.6288	38.6305	22247.4	0.08		2.49773	1.35785	0.217516	1.08185	0.796741	0.0665933	2.53282		4.59737	1.08185	0.0832823	0.820575		1275.84	15.9182	1271.37	9.89358	1268.74	12.4716	1303.08	31.9379	>1200		99.4432
n5564-19	25/04/2016	1989.32	1180.71	655.525	0.602277	0.593525	18.7033	15.6288	38.6305	241250	0.01		3.27922	1.03129	0.260963	1.00984	0.979204	0.0754417	2.18319		3.83197	1.00984	0.0911362	0.209229		1449.45	3.97766	1476.13	8.05636	1494.77	13.4866	1470.06	30.9313	>1200		103.126
n5564-79	26/04/2016	257.315	108.577	82.8803	0.423817	0.421962	18.7033	15.6288	38.6305	71467.3	0.03		3.42278	1.11744	0.264507	1.02688	0.91895	0.0776486	2.35264		3.78062	1.02688	0.0938513	0.440692		1505.12	8.30356	1509.64	8.8191	1512.86	13.8618	1511.5	34.2341	>1200		100.514
n5564-04	25/04/2016	170.633	145.176	65.4506	0.849572	0.850813	n/a	n/a	n/a	109788	{0.02}		3.88637	1.17715	0.285349	1.07858	0.916266	0.0823218	2.27427		3.50448	1.07858	0.0987795	0.471531		1601.21	8.77135	1610.85	9.55127	1618.25	15.4543	1598.96	34.9334	>1200		101.064
n5564-16	25/04/2016	230.168	174.595	88.5318	0.761448	0.758552	n/a	n/a	n/a	94991.2	{0.02}		4.05324	1.08907	0.29068	1.01727	0.934073	0.0851125	2.62288		3.4402	1.01727	0.101131	0.388885		1644.98	7.19693	1644.95	8.90883	1644.93	14.7859	1651.01	41.5398	>1200		99.997
n5564-50	26/04/2016	145.535	108.559	56.5865	0.769023	0.745932	n/a	n/a	n/a	54089.7	{0.03}		4.10669	1.20325	0.293586	1.04112	0.865259	0.0877374	2.2815		3.40615	1.04112	0.101451	0.603218		1650.83	11.1404	1655.64	9.87295	1659.43	15.2501	1699.84	37.1618	>1200		100.521
n5564-49	26/04/2016	191.779	70.7875	71.1859	0.38229	0.36911	n/a	n/a	n/a	>1e6	{0.00}		4.42364	1.22109	0.305224	1.07324	0.87892	0.0917882	2.42719		3.27628	1.07324	0.105114	0.58242		1716.31	10.6688	1716.78	10.1634	1717.16	16.1992	1774.98	41.2025	>1200		100.05
n5564-21	25/04/2016	764.651	124.091	277.819	0.156403	0.162285	18.7033	15.6288	38.6305	70445	0.03		4.83539	1.17555	0.313434	1.14969	0.978007	0.0913458	2.50034		3.19047	1.14969	0.111888	0.245187		1830.31	4.43759	1791.08	9.93928	1757.58	17.7106	1766.78	42.2557	>1200		96.0264
n5564-81	25/04/2016	101.402	74.9753	74.2666	0.761714	0.739383	18.7033	15.6288	38.6305	62597.6	0.03		13.4148	1.14488	0.526382	1.0621	0.927691	0.147041	2.31732		1.89976	1.0621	0.184834	0.42744		2696.73	7.04221	2709.3	10.8765	2726.19	23.6547	2772.83	59.9537	>1200		101.093
n5564-70	26/04/2016	89.3078	29.0365	60.3677	0.335056	0.325129	n/a	n/a	n/a	151631	{0.01}		13.5773	1.16498	0.529463	1.09907	0.943424	0.147685	2.44782		1.8887	1.09907	0.185984	0.386293		2706.97	6.35973	2720.68	11.0777	2739.19	24.5736	2784.18	63.5659	>1200		101.19
Sample FR15-48 Hunt Fork Schist (Dhs): N 67020´32.48´´ W 150043´47.29´´
n5568-56	29/04/2016	316.076	155.01	34.468	0.502363	0.490421	18.7033	15.6288	38.6305	22721.9	0.08		0.724566	1.3009	0.0902102	0.926612	0.712283	0.0276997	3.12346		11.0852	0.926612	0.0582534	0.913094		539.304	19.8487	553.359	5.56497	556.78	4.94456	552.259	17.0089	557.108	5.04864	103.24
n5568-53	29/04/2016	363.316	311.081	44.4421	0.835789	0.856228	n/a	n/a	n/a	52161.6	{0.04}		0.756978	1.1527	0.0921655	0.885619	0.7683	0.0288101	2.43301		10.8501	0.885619	0.0595681	0.737831		587.923	15.927	572.265	5.05526	568.331	4.81956	574.086	13.7664	567.947	4.91892	96.6676
n5568-09	30/04/2016	252.232	149.317	31.0833	0.58639	0.591983	n/a	n/a	n/a	33470.8	{0.06}		0.823791	1.24442	0.0993079	0.957925	0.769774	0.0303228	2.59098		10.0697	0.957925	0.0601634	0.794336		609.456	17.0786	610.161	5.72353	610.352	5.58087	603.783	15.4067	610.371	5.71064	100.147
n5568-49	29/04/2016	285.803	252.806	37.9929	0.865579	0.884546	18.7033	15.6288	38.6305	3575.5	0.52		0.83306	1.58254	0.0997961	0.958363	0.605586	0.0306329	2.59402		10.0204	0.958363	0.0605427	1.25935		623.025	26.9312	615.309	7.32909	613.214	5.60839	609.865	15.5778	613.002	5.74513	98.4253
n5568-71	29/04/2016	343.369	195.116	42.4406	0.558776	0.568241	n/a	n/a	n/a	143718	{0.01}		0.836199	1.23316	0.0998393	0.904223	0.733258	0.0311427	2.49513		10.0161	0.904223	0.0607445	0.838487		630.199	17.9604	617.046	5.71822	613.467	5.29352	619.861	15.2258	613.103	5.41755	97.345
n5568-60	29/04/2016	303.711	41.2221	33.4819	0.136061	0.135728	18.7033	15.6288	38.6305	27154.9	0.07		0.828536	1.27156	0.100102	0.891907	0.701428	0.0304419	3.43694		9.98985	0.891907	0.0600301	0.906291		604.658	19.4865	612.799	5.86716	615.004	5.23386	606.118	20.5123	615.227	5.36111	101.711
n5568-33	30/04/2016	319.03	117.588	37.5064	0.351351	0.368581	18.7033	15.6288	38.6305	43528.3	0.04		0.840686	1.16675	0.100317	0.889523	0.762394	0.0302506	2.62211		9.96842	0.889523	0.0607797	0.755019		631.448	16.1783	619.524	5.42527	616.265	5.23007	602.366	15.5557	615.935	5.34974	97.5956
n5568-19	30/04/2016	360.106	238.362	45.9165	0.668594	0.661922	n/a	n/a	n/a	52156.1	{0.04}		0.837957	1.08916	0.100825	0.857111	0.78695	0.0311311	2.66692		9.91821	0.857111	0.0602773	0.672027		613.544	14.451	618.017	5.0546	619.24	5.06261	619.633	16.2679	619.364	5.18253	100.928
n5568-04	30/04/2016	345.284	267.666	45.3882	0.767172	0.775206	n/a	n/a	n/a	46207.7	{0.04}		0.846043	1.10868	0.101043	0.886891	0.799953	0.0313113	2.43024		9.89676	0.886891	0.0607273	0.665277		629.591	14.2683	622.475	5.1724	620.52	5.2489	623.165	14.9078	620.319	5.37005	98.5592
n5568-43	29/04/2016	274.735	129.686	33.4267	0.507921	0.47204	n/a	n/a	n/a	38640.5	{0.05}		0.824325	1.32145	0.10112	1.06356	0.80484	0.0308663	2.61972		9.88923	1.06356	0.0591234	0.78427		571.644	16.9704	610.459	6.08104	620.97	6.29933	614.443	15.8483	622.041	6.45781	108.629
n5568-70	29/04/2016	750.691	274.193	89.8003	0.374678	0.365254	n/a	n/a	n/a	91948.1	{0.02}		0.84705	0.998592	0.101942	0.858563	0.859774	0.0315903	2.43193		9.80954	0.858563	0.0602638	0.509956		613.059	10.9788	623.028	4.66063	625.777	5.12219	628.633	15.047	626.059	5.24236	102.075
n5568-42	29/04/2016	169.099	174.1	24.9177	1.08701	1.02958	18.7033	15.6288	38.6305	14676.1	0.13		0.891951	1.5132	0.106785	1.07504	0.710446	0.0331221	3.45067		9.36461	1.07504	0.06058	1.06491		624.355	22.7979	647.417	7.26959	654.05	6.68985	658.623	22.3482	654.742	6.8641	104.756
n5568-63	29/04/2016	84.827	121.863	13.7705	1.51313	1.43661	18.7033	15.6288	38.6305	4566.92	0.41		0.902779	2.06791	0.107644	1.01018	0.488501	0.033513	2.72991		9.28991	1.01018	0.0608263	1.80438		633.097	38.3822	653.211	10.0114	659.049	6.33165	666.27	17.8841	659.661	6.52092	104.099
n5568-52	29/04/2016	847.85	685.207	119.884	0.812624	0.80817	18.7033	15.6288	38.6305	37100.8	0.05		0.914942	0.993882	0.108035	0.876533	0.881929	0.0330708	2.40438		9.2563	0.876533	0.0614228	0.468499		654.072	10.0206	659.681	4.83321	661.323	5.51165	657.619	15.5512	661.496	5.64679	101.109
n5568-27	30/04/2016	419.428	173.181	54.05	0.405735	0.412897	18.7033	15.6288	38.6305	49489.6	0.04		0.927705	1.13797	0.108278	0.852529	0.749167	0.0335676	2.52647		9.23551	0.852529	0.0621397	0.75377		678.92	16.0256	666.426	5.57599	662.738	5.37154	667.336	16.578	662.348	5.50864	97.6165
n5568-14	30/04/2016	668.293	502.231	94.2217	0.755003	0.751514	18.7033	15.6288	38.6305	37102.3	0.05		0.928972	1.05194	0.10857	0.925408	0.879714	0.0341725	2.73107		9.21065	0.925408	0.0620571	0.500202		676.077	10.6577	667.093	5.15704	664.437	5.84514	679.164	18.2321	664.156	5.98563	98.2783
n5568-35	30/04/2016	128.324	117.503	18.9048	0.961224	0.915675	n/a	n/a	n/a	96930	{0.02}		0.923051	1.44348	0.109566	0.933803	0.646912	0.0339206	2.67931		9.12692	0.933803	0.061101	1.10074		642.793	23.4874	663.972	7.05965	670.227	5.94698	674.24	17.7592	670.895	6.1235	104.268
n5568-62	29/04/2016	159.685	195.377	25.6763	1.1785	1.22352	n/a	n/a	n/a	62955.3	{0.03}		0.970043	1.51981	0.111287	0.97281	0.640089	0.0347121	2.55696		8.98577	0.97281	0.0632186	1.16767		715.592	24.609	688.486	7.62716	680.218	6.28313	689.707	17.3306	679.321	6.46176	95.0568
n5568-17	30/04/2016	217.213	286.4	35.4845	1.37648	1.31852	18.7033	15.6288	38.6305	7825.03	0.24		0.94321	1.3989	0.111716	0.947252	0.67714	0.0339819	2.47962		8.95123	0.947252	0.0612336	1.02939		647.451	21.9584	674.561	6.91806	682.709	6.13922	675.437	16.4648	683.581	6.31178	105.446
n5568-65	29/04/2016	127.435	203.154	22.3715	1.62017	1.59417	n/a	n/a	n/a	85078.1	{0.02}		0.969878	1.50353	0.113249	0.980271	0.651977	0.034669	2.5225		8.83009	0.980271	0.0621128	1.14004		677.994	24.179	688.401	7.54456	691.59	6.43167	688.865	17.0766	691.938	6.62616	102.005
n5568-31	30/04/2016	85.2979	46.6946	12.1204	0.540919	0.547429	n/a	n/a	n/a	28975.7	{0.06}		1.00032	1.65384	0.115959	1.0359	0.626362	0.034491	2.80738		8.62377	1.0359	0.0625655	1.28922		693.497	27.2467	703.973	8.43269	707.26	6.94267	685.387	18.91	707.624	7.16346	101.985
n5568-36	30/04/2016	473.687	256.501	68.0903	0.555896	0.541498	n/a	n/a	n/a	107042	{0.02}		1.00884	1.16158	0.117108	0.864397	0.744153	0.0356798	2.63604		8.53913	0.864397	0.0624794	0.775949		690.558	16.4633	708.29	5.94058	713.896	5.84412	708.601	18.347	714.519	6.02039	103.38
n5568-61	29/04/2016	123.72	38.4575	22.1012	0.303339	0.310843	18.7033	15.6288	38.6305	24491.1	0.08		1.48555	1.37536	0.153526	0.983984	0.715438	0.0461314	3.24379		6.51357	0.983984	0.0701788	0.960931		933.59	19.5913	924.501	8.38113	920.696	8.44782	911.552	28.8913	920.185	8.80282	98.6189
n5568-72	29/04/2016	1330.38	79.4315	228.683	0.0580513	0.059706	18.7033	15.6288	38.6305	22796.3	0.08		1.54177	0.91434	0.157912	0.858386	0.938804	0.0468891	3.17222		6.33266	0.858386	0.0708114	0.314946		951.973	6.43	947.209	5.64713	945.161	7.55082	926.185	28.6973	944.879	7.85937	99.2844
n5568-08	30/04/2016	397.697	52.5671	70.1671	0.123686	0.132179	18.7033	15.6288	38.6305	16406.7	0.11		1.54844	1.00287	0.159297	0.866759	0.864279	0.0446883	2.83457		6.2776	0.866759	0.0704994	0.504457		942.933	10.3006	949.87	6.20612	952.867	7.68223	883.65	24.4932	953.281	8.01102	101.053
n5568-59	29/04/2016	370.828	37.9515	65.215	0.100576	0.102343	18.7033	15.6288	38.6305	15968.8	0.12		1.55396	1.24414	0.159784	0.876386	0.704408	0.0469847	4.33116		6.25843	0.876386	0.0705347	0.883088		943.96	17.9846	952.067	7.7157	955.579	7.78812	928.031	39.2476	956.065	8.13507	101.231
n5568-32	30/04/2016	1093.84	107.094	193.676	0.0873509	0.0979062	18.7033	15.6288	38.6305	19516.7	0.1		1.57344	0.917558	0.161453	0.853384	0.93006	0.0428524	4.03022		6.19376	0.853384	0.0706814	0.337117		948.212	6.88563	959.786	5.71243	964.845	7.65181	848.098	33.4454	965.551	7.98254	101.754
n5568-47	29/04/2016	244.987	62.6252	45.6408	0.260583	0.255626	18.7033	15.6288	38.6305	22459.5	0.08		1.59112	1.11601	0.162033	0.899998	0.806441	0.0497821	2.63895		6.17158	0.899998	0.0712196	0.659914		963.723	13.4183	966.738	6.98244	968.065	8.09501	981.963	25.2783	968.251	8.45516	100.451
n5568-02	30/04/2016	221.242	23.9828	39.7139	0.109979	0.108401	18.7033	15.6288	38.6305	30943.2	0.06		1.58607	1.08814	0.162717	0.881545	0.810142	0.0487507	3.01586		6.14565	0.881545	0.0706949	0.637903		948.604	13.0028	964.754	6.79905	971.857	7.95773	962.095	28.3158	972.853	8.32128	102.451
n5568-45	29/04/2016	396.429	41.2662	71.099	0.104651	0.104095	18.7033	15.6288	38.6305	34941.9	0.05		1.58761	0.989476	0.162801	0.845781	0.854777	0.0483564	2.83636		6.14248	0.845781	0.0707271	0.513534		949.536	10.4747	965.359	6.18303	972.322	7.63808	954.494	26.4263	973.3	7.98295	102.4
n5568-06	30/04/2016	244.004	57.4545	45.421	0.22921	0.235465	18.7033	15.6288	38.6305	33048.3	0.06		1.6139	1.1585	0.163058	0.921966	0.795826	0.048353	2.78021		6.1328	0.921966	0.0717851	0.701503		979.853	14.2249	975.624	7.28908	973.747	8.33785	954.428	25.9018	973.482	8.71173	99.3769
n5568-28	30/04/2016	211.286	53.7946	39.7429	0.252086	0.254606	n/a	n/a	n/a	43706.8	{0.04}		1.62711	1.08926	0.163658	0.879726	0.807639	0.0496496	2.58332		6.11029	0.879726	0.0721072	0.64231		988.967	13.0115	980.744	6.87335	977.075	7.98081	979.412	24.6831	976.551	8.34194	98.7975
n5568-18	30/04/2016	388.253	38.7583	69.8744	0.0992783	0.0998275	18.7033	15.6288	38.6305	64203.2	0.03		1.59625	0.984111	0.163614	0.857469	0.871313	0.0478813	2.91472		6.11193	0.857469	0.0707584	0.482931		950.441	9.85109	968.744	6.16234	976.831	7.77698	945.333	26.9015	977.971	8.13123	102.777
n5568-69	29/04/2016	213.552	57.3067	40.0757	0.252939	0.268351	18.7033	15.6288	38.6305	17136.6	0.11		1.59131	1.22069	0.164107	0.960682	0.786998	0.04477	8.02891		6.09357	0.960682	0.0703277	0.753113		937.936	15.3649	966.812	7.6402	979.562	8.73629	885.23	69.4211	981.359	9.14718	104.438
n5568-05	30/04/2016	431.915	102.678	81.4998	0.242071	0.237727	18.7033	15.6288	38.6305	85389.2	0.02		1.61932	1.15927	0.165169	1.04392	0.900499	0.0495545	2.86033		6.0544	1.04392	0.0711055	0.504117		960.449	10.266	977.729	7.30331	985.439	9.54657	977.58	27.2781	986.535	9.98186	102.602
n5568-38	30/04/2016	59.6654	26.5245	12.2764	0.414015	0.444555	18.7033	15.6288	38.6305	13636.8	0.14		1.7502	1.90214	0.171044	1.36925	0.719847	0.0495255	3.4959		5.84645	1.36925	0.0742126	1.32034		1047.25	26.3959	1027.23	12.3662	1017.86	12.9053	977.022	33.3159	1016.47	13.5187	97.1932
n5568-10	30/04/2016	464.717	80.6673	94.5302	0.199641	0.173584	18.7033	15.6288	38.6305	68943.5	0.03		1.85532	0.992187	0.179082	0.863313	0.870112	0.0626585	2.52036		5.58403	0.863313	0.075139	0.489004		1072.22	9.792	1065.32	6.56736	1061.96	8.45823	1228.37	30.0152	1061.44	8.88677	99.0428
n5568-64	29/04/2016	269.828	129.254	61.3688	0.492675	0.479025	18.7033	15.6288	38.6305	35517.6	0.05		1.92781	1.06512	0.186819	0.895506	0.840759	0.0556052	2.69518		5.35278	0.895506	0.0748416	0.576663		1064.25	11.5545	1090.78	7.1462	1104.12	9.09346	1093.77	28.6753	1106.24	9.61382	103.746
n5568-24	30/04/2016	279.418	79.9595	60.8298	0.289091	0.286164	n/a	n/a	n/a	75476.9	{0.02}		1.96645	0.998803	0.187285	0.863116	0.86415	0.0564533	2.48914		5.33947	0.863116	0.0761518	0.502631		1099.07	10.0239	1104.09	6.74524	1106.65	8.78274	1110	26.8667	1107.06	9.27408	100.69
n5568-11	30/04/2016	427.233	38.1744	88.7089	0.0874064	0.0893526	18.7033	15.6288	38.6305	80306.5	0.02		1.98991	0.991744	0.188258	0.871289	0.878543	0.0553461	2.92638		5.31185	0.871289	0.0766614	0.47372		1112.4	9.43042	1112.09	6.72422	1111.93	8.9048	1088.81	30.9958	1111.91	9.3966	99.9584
n5568-20	30/04/2016	149.852	36.4775	33.7934	0.242293	0.243423	18.7033	15.6288	38.6305	23306.9	0.08		2.0927	1.14589	0.196426	0.90453	0.789367	0.0571355	2.72074		5.09097	0.90453	0.0772692	0.703488		1128.15	13.9513	1146.41	7.90374	1156.09	9.58026	1123.05	29.7001	1157.71	10.1748	102.477
n5568-07	30/04/2016	180.094	69.4198	42.7065	0.395746	0.385465	18.7033	15.6288	38.6305	29733.4	0.06		2.12839	1.08461	0.198775	0.896876	0.826912	0.0594708	2.51963		5.03082	0.896876	0.0776586	0.60991		1138.15	12.085	1158.06	7.5204	1168.73	9.59394	1167.65	28.5666	1170.54	10.1973	102.687
n5568-34	30/04/2016	222.532	81.9021	55.6041	0.344928	0.368047	18.7033	15.6288	38.6305	31445.4	0.06		2.47952	1.96537	0.20811	1.64887	0.838964	0.0646051	3.60769		4.80515	1.64887	0.0864118	1.06953		1347.41	20.5082	1266.07	14.3212	1218.74	18.3362	1265.36	44.2025	>1200		90.4505
n5568-26	30/04/2016	213.121	95.0537	60.4462	0.482484	0.446007	18.7033	15.6288	38.6305	61005.6	0.03		2.82331	1.05498	0.227991	0.931964	0.883395	0.0788231	2.47311		4.38614	0.931964	0.0898131	0.494395		1421.56	9.41779	1361.75	7.94128	1323.96	11.1639	1533.52	36.4895	>1200		93.1344
n5568-16	30/04/2016	271.658	43.6152	70.5159	0.149182	0.160552	18.7033	15.6288	38.6305	57390.8	0.03		2.82796	1.44995	0.228184	1.26917	0.875318	0.0677793	3.92043		4.38243	1.26917	0.0898851	0.70112		1423.09	13.3356	1362.98	10.9352	1324.97	15.2185	1325.54	50.237	>1200		93.1054
n5568-57	29/04/2016	631.909	115.783	165.684	0.178885	0.183227	18.7033	15.6288	38.6305	104130	0.02		2.85049	1.39625	0.228342	1.34243	0.961457	0.071933	3.00277		4.3794	1.34243	0.0905383	0.383905		1436.91	7.30285	1368.94	10.55	1325.8	16.1072	1404.01	40.6873	>1200		92.2677
n5568-40	29/04/2016	56.0802	11.5808	15.2849	0.197073	0.206504	n/a	n/a	n/a	82140.9	{0.02}		2.91486	1.40939	0.23721	1.02607	0.728026	0.0687879	3.33329		4.21568	1.02607	0.0891218	0.966203		1406.78	18.3881	1385.77	10.7115	1372.17	12.6944	1344.62	43.3154	>1200		97.5402
n5568-13	30/04/2016	107.634	54.5906	31.6816	0.503089	0.507185	n/a	n/a	n/a	205275	{0.01}		2.89395	1.21328	0.23753	0.999057	0.823436	0.0706356	2.57073		4.20999	0.999057	0.0883631	0.688425		1390.39	13.1539	1380.34	9.19722	1373.84	12.3734	1379.54	34.2518	>1200		98.81
n5568-12	30/04/2016	110.995	41.4863	31.8365	0.359841	0.373768	18.7033	15.6288	38.6305	34304.5	0.05		2.93472	1.13828	0.239748	0.91925	0.807581	0.0690169	2.61543		4.17104	0.91925	0.088779	0.671305		1399.4	12.8123	1390.91	8.65726	1385.39	11.4699	1348.95	34.1005	>1200		98.9989
n5568-66	29/04/2016	69.5303	36.0244	21.5792	0.513857	0.51811	18.7033	15.6288	38.6305	13956.8	0.13		3.09947	1.39033	0.250473	1.00095	0.719933	0.0721928	2.85667		3.99245	1.00095	0.0897481	0.96495		1420.18	18.3308	1432.56	10.73	1440.91	12.9375	1408.91	38.8399	>1200		101.46
n5568-15	30/04/2016	265.401	93.1984	81.5453	0.347932	0.35116	n/a	n/a	n/a	89220.9	{0.02}		3.26364	0.957222	0.257399	0.868322	0.907127	0.074562	2.59466		3.88501	0.868322	0.0919588	0.402853		1466.53	7.63174	1472.43	7.46724	1476.52	11.4688	1453.53	36.3572	>1200		100.681
n5568-41	29/04/2016	214.691	94.6643	67.8367	0.426811	0.440932	n/a	n/a	n/a	103244	{0.02}		3.3488	1.1386	0.258669	1.00821	0.885481	0.0748784	2.53568		3.86594	1.00821	0.0938952	0.529078		1506.01	9.96226	1492.51	8.94192	1483.03	13.3706	1459.47	35.6717	>1200		98.4743
n5568-68	29/04/2016	92.4803	32.8536	28.7102	0.347966	0.35525	n/a	n/a	n/a	51420.3	{0.04}		3.32983	1.37117	0.259721	1.15705	0.843844	0.0748083	2.76691		3.85029	1.15705	0.0929851	0.735753		1487.58	13.8701	1488.07	10.764	1488.41	15.3965	1458.16	38.8875	>1200		100.056
n5568-50	29/04/2016	134.23	32.7128	41.0373	0.238566	0.243706	n/a	n/a	n/a	47411.7	{0.04}		3.40879	1.1089	0.26247	0.94371	0.85103	0.0760364	2.73969		3.80997	0.94371	0.0941932	0.582303		1511.99	10.9521	1506.42	8.74324	1502.46	12.6602	1481.24	39.0922	>1200		99.3699
n5568-23	30/04/2016	498.779	216.138	162.73	0.440018	0.433334	18.7033	15.6288	38.6305	192377	0.01		3.45583	0.907938	0.267198	0.855981	0.942775	0.078449	2.40708		3.74255	0.855981	0.0938034	0.302732		1504.16	5.70975	1517.2	7.17535	1526.56	11.6456	1526.51	35.36	>1200		101.489
n5568-46	29/04/2016	201.293	158.977	76.0043	0.78355	0.78978	18.7033	15.6288	38.6305	40578.5	0.05		3.9265	1.02739	0.283076	0.921361	0.896793	0.0836002	2.43022		3.53261	0.921361	0.100601	0.454571		1635.21	8.41969	1619.16	8.34869	1606.84	13.1172	1622.82	37.861	>1200		98.2647
n5568-73	29/04/2016	136.006	71.6658	48.3347	0.529263	0.52693	n/a	n/a	n/a	155570	{0.01}		3.88018	1.16923	0.283317	1.02153	0.873676	0.0833641	2.61149		3.52962	1.02153	0.0993295	0.568839		1611.56	10.5609	1609.57	9.48357	1608.04	14.5545	1618.42	40.5762	>1200		99.7819
n5568-22	30/04/2016	102.586	115.993	41.3463	1.06177	1.13069	n/a	n/a	n/a	67430.1	{0.03}		3.97551	1.1973	0.283634	1.02665	0.857469	0.080104	2.60313		3.52567	1.02665	0.101656	0.616053		1654.58	11.3711	1629.21	9.76053	1609.64	14.6403	1557.5	38.9834	>1200		97.2841
n5568-21	30/04/2016	112.731	90.4319	43.198	0.808	0.80219	18.7033	15.6288	38.6305	30607.1	0.06		3.9476	1.10624	0.287216	0.936502	0.846561	0.0839555	2.67555		3.4817	0.936502	0.0996836	0.588844		1618.19	10.9216	1623.5	9.00208	1627.6	13.4846	1629.45	41.8423	>1200		100.582
n5568-25	30/04/2016	417.42	480.18	172.777	1.15442	1.15035	18.7033	15.6288	38.6305	44650.7	0.04		3.97985	0.894298	0.288342	0.841267	0.9407	0.084069	2.4118		3.4681	0.841267	0.100105	0.30338		1626.04	5.63119	1630.1	7.28315	1633.24	12.1489	1631.56	37.7683	>1200		100.443
n5568-01	30/04/2016	127.099	80.7633	47.5336	0.639432	0.635438	18.7033	15.6288	38.6305	57712.7	0.03		4.04908	1.02908	0.290413	0.889725	0.864582	0.0853111	2.45781		3.44337	0.889725	0.10112	0.517105		1644.78	9.56252	1644.11	8.41437	1643.59	12.921	1654.71	39.0116	>1200		99.9277
n5568-67	29/04/2016	105.738	67.8658	39.604	0.63691	0.64183	n/a	n/a	n/a	37876.8	{0.05}		4.06948	1.13785	0.290804	0.949452	0.834424	0.0844919	2.53238		3.43874	0.949452	0.101493	0.627096		1651.61	11.5786	1648.21	9.31714	1645.54	13.8037	1639.45	39.8385	>1200		99.6329
n5568-44	29/04/2016	51.3358	32.3976	19.58	0.634561	0.631093	n/a	n/a	n/a	68142.1	{0.03}		4.06038	1.43505	0.300056	1.15697	0.806223	0.0822463	3.63183		3.33271	1.15697	0.0981438	0.848993		1589.15	15.7808	1646.38	11.7596	1691.59	17.237	1597.55	55.7097	>1200		106.446
n5568-51	29/04/2016	474.679	509.477	213.488	1.08363	1.07331	18.7033	15.6288	38.6305	170311	0.01		4.68166	0.891355	0.318122	0.849464	0.953003	0.0910044	2.56213		3.14345	0.849464	0.106734	0.270046		1744.38	4.93878	1763.97	7.48523	1780.55	13.2296	1760.46	43.1507	>1200		102.073
n5568-29	30/04/2016	137.821	58.6049	56.5823	0.418399	0.425223	18.7033	15.6288	38.6305	41630.9	0.04		5.21511	1.03076	0.332373	0.919355	0.89192	0.0948936	2.65385		3.00867	0.919355	0.113798	0.466102		1860.94	8.39336	1855.09	8.82037	1849.87	14.8013	1832.38	46.4362	>1200		99.4056
n5568-48	29/04/2016	285.788	224.64	131.974	0.785141	0.786039	n/a	n/a	n/a	415528	{0.00}		5.53678	0.964123	0.343946	0.91005	0.943915	0.098835	2.39746		2.90744	0.91005	0.116753	0.318342		1907.09	5.70607	1906.33	8.32598	1905.62	15.0313	1905.01	43.5387	>1200		99.923
n5568-30	30/04/2016	313.125	536.614	258.048	1.69346	1.71374	n/a	n/a	n/a	184851	{0.01}		12.4576	0.925101	0.493576	0.90194	0.974963	0.140149	2.39151		2.02603	0.90194	0.183054	0.20571		2680.74	3.39857	2639.54	8.73278	2586.13	19.2429	2651.01	59.3303	>1200		96.4707
n5568-55	29/04/2016	55.6233	37.5437	40.653	0.654125	0.674963	18.7033	15.6288	38.6305	44527.8	0.04		14.1698	1.20234	0.532044	1.10331	0.917641	0.142305	2.66573		1.87954	1.10331	0.193159	0.47782		2769.24	7.81738	2761.14	11.4681	2750.06	24.7472	2689.19	67.0112	>1200		99.3072
n5568-03	30/04/2016	46.0113	55.24	37.4786	1.21266	1.20057	n/a	n/a	n/a	51384.8	{0.04}		14.0736	1.16837	0.536027	1.00748	0.862294	0.146973	2.56719		1.86558	1.00748	0.190422	0.591672		2745.81	9.69457	2754.68	11.1373	2766.8	22.7043	2771.63	66.381	>1200		100.764
Note f206 (%) indicates the fraction of radiogenic vs. common Pb and the values in parentheses indicate when no correction has been applied. The 207-corrcted ages are calculated by projecting from an assumed common Pb composition (207Pb/206Pb=0.83) through the analysis onto Concordia (Ludwig, 2008).
																																				99.3832

## Sheet: SIMS O
Sample ID	Date Analysis Run	Sequence in SIMS Run	U (ppm)	Th (ppm)	Pb (ppm)	Th/U Calc.	Th/U Meas.	206Pb/238U & 207 corr. Age (Ma)	±σ	Conc.		16O cps (x 109)	16O sample/av.std	18O/16O drift corrected	± abs	δ18O	± ‰ (1 SD)
Sample FR15-21A Wacke & Limestone (Pzw): N 67041´02.20´´ W 151001´51.87´´
n5643ox_06	25/10/2016	277	361.853	147.7	27.067	0.37891	0.408177	399.782	4.2401	102.753		2.85528	0.991275	0.00202136	1.73758e-07	7.01881	0.153422
n5643ox_52	25/10/2016	338	148.943	43.4005	11.3124	0.299448	0.29139	412.853	5.10209	100.08		2.87816	0.99709	0.00201781	1.62138e-07	5.25417	0.150105
n5643ox_15	25/10/2016	288	670.116	350.985	53.8845	0.496357	0.523768	414.711	5.75714	99.8666		2.875	0.993988	0.00202258	1.36706e-07	7.63004	0.144077
n5643ox_53	25/10/2016	337	447.033	140.702	35.501	0.323131	0.314746	426.474	4.0374	96.236		2.8759	0.996307	0.00201948	1.50994e-07	6.08703	0.14734
n5643ox_37	25/10/2016	318	84.7947	32.0576	6.95406	0.365035	0.378061	431.679	5.12905	90.5778		2.8145	0.996638	0.00202	1.53835e-07	6.34288	0.148081
n5643ox_77	25/10/2016	376	141.606	84.2357	12.308	0.56038	0.594861	433.869	4.56446	91.8468		2.88932	1.0021	0.00202027	2.29436e-07	6.48002	0.170248
n5643ox_10	25/10/2016	281	96.5413	33.5034	7.87451	0.345404	0.347037	434.288	5.15722	94.9795		2.85498	0.991171	0.0020194	1.95893e-07	6.04381	0.159681
n5643ox_22	25/10/2016	298	273.382	94.819	22.0755	0.364594	0.346837	434.682	5.06451	108.891		2.89362	0.995546	0.00202009	1.5477e-07	6.38847	0.148323
n5643ox_20	25/10/2016	295	165.352	57.3434	13.3731	0.327222	0.346796	435.38	4.67791	100.032		2.89369	0.99557	0.00201859	1.77128e-07	5.6424	0.154213
n5643ox_79	25/10/2016	374	258.058	78.5473	20.8642	0.271313	0.304379	435.418	4.89058	87.0521		2.88851	1.00182	0.00201971	2.36696e-07	6.19798	0.172623
n5643ox_67	25/10/2016	363	568.412	509.582	53.3535	0.913508	0.896501	435.924	4.4274	99.5629		2.84669	1.00675	0.00201738	1.35736e-07	5.03942	0.143564
n5643ox_24	25/10/2016	297	106.582	32.7416	8.60817	0.282546	0.307195	436.819	5.05199	93.3493		2.89239	0.995123	0.00201812	1.39306e-07	5.40513	0.144435
n5643ox_48	25/10/2016	330	696.067	181.871	55.6752	0.24796	0.261283	436.902	4.39632	93.1653		2.86233	1.0098	0.00202058	1.28524e-07	6.63162	0.14212
n5643ox_50	25/10/2016	335	419.107	190.898	35.2712	0.518074	0.455489	436.93	4.4665	109.782		2.88804	1.00051	0.00201808	1.46189e-07	5.38926	0.146079
n5643ox_11	25/10/2016	285	401.856	258.575	35.5365	0.628784	0.643452	437.14	4.42097	96.271		2.87366	0.993525	0.00201768	1.50956e-07	5.1866	0.147232
n5643ox_61	25/10/2016	347	267.587	88.2305	21.7253	0.342999	0.329726	437.255	5.48371	104.37		2.84776	0.987447	0.00201867	2.29837e-07	5.67876	0.170304
n5643ox_40	25/10/2016	323	86.2465	25.5722	6.96421	0.289833	0.296501	437.286	5.53408	96.3391		2.82477	1.00028	0.00201863	1.74385e-07	5.6632	0.153453
n5643ox_65	25/10/2016	355	211.258	72.5709	17.2549	0.410899	0.343518	437.569	4.46636	115.297		2.81815	0.992254	0.00201891	1.61622e-07	5.79945	0.150028
n5643ox_64	25/10/2016	353	230.446	119.346	19.6387	0.583235	0.517891	437.846	4.50978	113.297		2.83989	0.999905	0.00201843	1.93105e-07	5.56329	0.158804
n5643ox_60	25/10/2016	346	273.461	112.144	22.8878	0.392711	0.41009	439.482	4.3363	94.8391		0.0851633	0.02953	0.00193658	3.26489e-06	cps limit
n5643ox_80	25/10/2016	372	338.576	143.386	28.3091	0.461635	0.423496	440.234	4.14597	110.552		2.88181	0.999498	0.00202002	1.55657e-07	6.35127	0.148545
n5643ox_35	25/10/2016	313	145.288	38.4949	11.8001	0.245482	0.264955	441.232	4.72175	88.1217		2.8257	0.991956	0.00202099	1.19245e-07	6.83575	0.140161
n5643ox_39	25/10/2016	320	292.743	86.3646	23.8014	0.290305	0.295019	441.319	4.39767	98.935		2.81367	0.996344	0.00202065	1.44687e-07	6.6672	0.145856
n5643ox_44	25/10/2016	327	125.644	56.0395	10.5703	0.501428	0.446019	441.327	4.83677	115.33		2.8373	1.00097	0.0020189	1.76591e-07	5.79822	0.15408
n5643ox_58	25/10/2016	345	193.594	74.3748	16.1183	0.407115	0.38418	441.558	4.64518	105.542		2.83982	0.984693	0.00202015	1.71742e-07	6.42068	0.152805
n5643ox_27	25/10/2016	304	1405.88	410.713	114.092	0.307337	0.292139	442.011	4.01563	106.918		2.84149	0.982976	0.00201864	1.42996e-07	5.66716	0.145339
n5643ox_55	25/10/2016	340	455.769	198.274	38.5943	0.43075	0.435032	442.783	4.89932	99.3697		2.87881	0.997318	0.00201996	1.85498e-07	6.32247	0.15666
n5643ox_04	25/10/2016	276	1018.97	386.704	84.3431	0.406544	0.379503	442.961	4.46268	113.705		2.85913	0.992611	0.00201969	1.41906e-07	6.18705	0.145136
n5643ox_81	25/10/2016	373	222.433	114.414	19.3217	0.533288	0.514376	443.712	4.52304	101.457		2.88547	1.00077	0.00202018	2.33104e-07	6.43181	0.171452
n5643ox_69	25/10/2016	365	261.45	103.767	22.0401	0.401886	0.396889	443.899	4.33553	98.99		2.87123	1.01543	0.00202009	2.17804e-07	6.3876	0.166479
n5643ox_51	25/10/2016	336	240.508	73.865	19.7486	0.325417	0.30712	444.589	4.58603	105.814		2.86763	0.993444	0.00201938	1.18367e-07	6.03707	0.139888
n5643ox_25	25/10/2016	302	604.075	382.932	53.7514	0.721868	0.633915	444.609	4.3066	115.587		2.85449	0.987474	0.0020199	1.36403e-07	6.29278	0.143858
n5643ox_73	25/10/2016	361	382.036	176.276	32.7133	0.47126	0.461413	444.827	4.47754	102.304		2.83096	1.00118	0.00201878	3.57716e-07	5.73672	0.217465
n5643ox_49	25/10/2016	331	241.555	69.5457	19.8202	0.305076	0.287908	447.214	5.01917	107.538		2.87494	1.01425	0.0020198	1.2482e-07	6.24479	0.14127
n5643ox_78	25/10/2016	375	461.566	178.27	39.0026	0.418332	0.386228	447.569	4.50733	107.275		2.88037	0.998998	0.00201994	1.35477e-07	6.31435	0.143647
n5643ox_38	25/10/2016	319	211.529	86.3648	17.8598	0.440373	0.408287	447.605	5.02976	112.695		2.80909	0.994722	0.00202097	1.58549e-07	6.82663	0.149339
n5643ox_46	25/10/2016	329	296.325	101.626	24.776	0.389652	0.342954	447.961	4.32213	111.354		2.85677	1.00784	0.00202127	1.1861e-07	6.97508	0.140046
n5643ox_07	25/10/2016	279	187.378	87.636	16.2885	0.433824	0.467697	449.65	6.25707	93.129		2.85737	0.992	0.00202088	1.24652e-07	6.78418	0.141295
n5643ox_41	25/10/2016	322	162.103	44.1386	13.3709	0.26361	0.272287	449.978	4.82375	97.4764		2.81367	0.996344	0.00202214	1.9225e-07	7.41042	0.158739
n5643ox_05	25/10/2016	278	225.549	55.1629	18.5262	0.248647	0.244572	450.409	4.61115	98.5008		2.84881	0.989026	0.00201993	1.76291e-07	6.31065	0.15405
n5643ox_28	25/10/2016	305	275.751	110.77	23.4836	0.431275	0.401702	450.48	4.69957	109.07		2.84321	0.983573	0.00202169	2.17829e-07	7.18692	0.166564
n5643ox_70	25/10/2016	354	450.435	123.537	37.1855	0.310087	0.274262	450.596	4.33155	110.821		2.81718	0.991912	0.00202373	1.48582e-07	8.20247	0.146974
n5643ox_71	25/10/2016	357	254.706	105.63	21.8573	0.437957	0.414712	450.893	4.3635	104.949		2.81348	0.990606	0.00202083	1.572e-07	6.75592	0.148984
n5643ox_21	25/10/2016	301	523.945	90.893	42.2358	0.172224	0.173478	451.04	4.32806	96.8328		2.85911	0.989074	0.00202497	2.39709e-07	8.82175	0.173875
n5643ox_43	25/10/2016	326	239.398	90.7379	20.3846	0.41355	0.379025	451.372	4.46121	107.245		2.82799	0.997683	0.00201909	1.19143e-07	5.88855	0.140031
n5643ox_68	25/10/2016	364	205.652	100.424	17.9637	0.469615	0.48832	451.389	6.87908	98.8264		2.85457	1.00953	0.00201963	1.74131e-07	6.15741	0.153434
n5643ox_62	25/10/2016	348	205.012	64.1402	17.1332	0.307372	0.31286	451.597	4.67907	100.021		2.8333	0.982431	0.00201902	2.17923e-07	5.85552	0.166466
n5643ox_63	25/10/2016	352	329.161	92.8885	27.369	0.301415	0.282198	452.283	4.53051	104.956		2.82656	0.995213	0.00201989	1.19189e-07	6.28786	0.140087
n5643ox_42	25/10/2016	321	554.53	156.666	46.1705	0.286785	0.28252	452.611	4.47397	100.488		2.80671	0.993881	0.00201873	1.19567e-07	5.70915	0.140099
n5643ox_16a	25/10/2016	293	216.52	118.586	19.3172	0.642121	0.547691	453.311	4.84376	115.658		2.89124	0.994727	0.00202114	1.46994e-07	6.91084	0.146443
n5643ox_17	25/10/2016	294	415.618	117.563	34.6841	0.294679	0.282862	454.976	4.53993	105.784		2.88873	0.993864	0.0020251	1.67572e-07	8.88216	0.151935
n5643ox_36	25/10/2016	314	298.811	67.7925	24.6033	0.252366	0.226874	456.519	4.41251	113.39		2.82343	0.991157	0.00202465	1.19383e-07	8.65923	0.140399
n5643ox_12	25/10/2016	284	468.586	173.995	40.3545	0.3797	0.37132	456.813	4.42765	101.057		2.86768	0.991458	0.00202207	1.18411e-07	7.377	0.140051
n5643ox_56	25/10/2016	343	443.059	166.433	38.2602	0.386871	0.375646	458.592	4.49345	103.673		2.86205	0.992402	0.00202238	1.63212e-07	7.5272	0.150631
n5643ox_13	25/10/2016	286	172.328	46.875	14.4731	0.301729	0.27201	459.948	5.17637	113.309		2.86533	0.990644	0.00202247	1.59199e-07	7.57604	0.149587
n5643ox_01	25/10/2016	272	680.51	356.396	61.8645	0.536669	0.523719	463.864	4.7467	102.47		2.86069	0.977238	0.0020191	1.50184e-07	5.89482	0.147118
n5643ox_29	25/10/2016	306	114.79	30.1628	9.753	0.283395	0.262765	465.942	5.52108	110.243		2.84484	0.984138	0.00201637	1.18705e-07	4.53582	0.139785
n5643ox_54	25/10/2016	339	170.064	54.8976	14.8298	0.302546	0.322806	466.532	4.95822	91.7144		2.87876	0.997298	0.00201627	1.70083e-07	4.48407	0.152149
n5643ox_32	25/10/2016	309	348.168	186.222	32.0715	0.610309	0.534862	469.271	4.64442	113.469		2.83826	0.996364	0.00201757	2.20953e-07	5.13331	0.167365
n5643ox_72	25/10/2016	360	187.187	71.1977	16.7023	0.402083	0.380357	471.166	4.97528	103.156		2.8322	1.00162	0.00201778	1.76926e-07	5.23891	0.154115
n5643ox_66	25/10/2016	356	126.639	39.0166	11.1214	0.30323	0.308093	472.707	5.4143	97.3567		2.81173	0.989993	0.00201703	1.3479e-07	4.86408	0.143328
n5643ox_74	25/10/2016	362	117.59	33.9497	10.3126	0.270171	0.288712	473.634	5.20421	92.2437		2.83156	1.0014	0.00201627	2.08882e-07	4.48387	0.163486
n5643ox_23	25/10/2016	296	197.146	77.2681	17.7802	0.436255	0.391934	475.416	5.23442	109.014		2.8885	0.993783	0.00201773	2.82952e-07	5.2139	0.188725
n5643ox_08	25/10/2016	280	652.541	392.103	62.4472	0.634529	0.600887	480.155	5.27769	107.633		2.84734	0.988517	0.0020167	2.14714e-07	4.70048	0.165335
n5643ox_33	25/10/2016	311	229.836	114.43	21.7789	0.530466	0.497876	485.166	5.10976	104.975		2.83015	0.993518	0.00201788	1.68881e-07	5.2881	0.151908
n5643ox_26	25/10/2016	303	403.995	199.036	38.1146	0.501387	0.49267	485.955	5.59892	104.249		2.85057	0.986119	0.00201764	1.64523e-07	5.16718	0.150726
n5643ox_34	25/10/2016	312	963.741	551.637	95.1108	0.583107	0.572391	496.379	4.68777	102.502		2.82073	0.990211	0.00201588	2.42519e-07	4.29286	0.174404
n5643ox_02	25/10/2016	273	500.902	289.862	49.383	0.614525	0.578681	497.763	5.00767	109.64		2.85826	0.976408	0.00201754	1.4352e-07	5.11799	0.145404
n5643ox_16b	25/10/2016	289	514.288	340.835	51.8528	0.722045	0.662731	498.125	5.11761	111.276		2.88817	0.99854	0.00201652	1.17832e-07	4.61009	0.139614
n5643ox_31	25/10/2016	310	425.452	349.391	45.092	0.93167	0.821222	501.459	4.82805	112.503		2.82218	0.99072	0.00201674	2.62314e-07	4.721	0.181281
n5643ox_47	25/10/2016	328	806	449.132	81.1271	0.599958	0.557236	506.967	4.6938	106.421		2.83951	1.00175	0.00201708	1.23051e-07	4.88686	0.140737
n5643ox_14	25/10/2016	287	872.905	626.607	92.5714	0.774775	0.71784	513.812	4.94758	107.643		2.87203	0.992959	0.0020168	1.74603e-07	4.75091	0.153418
n5643ox_75	25/10/2016	369	130.448	113.983	55.5032	0.874353	0.873785	1751.83	15.9746	99.4872		2.88856	1.00184	0.00202466	1.21257e-07	8.66669	0.14079
Sample FR15-24 Calcareous Chloritic Wacke (Dbcw): N 67034´14.84´´ W 151001´45.17´´
n5636ox_40	2016-07-10	239	838.649	36.0219	98.0012	0.0441343	0.0429523	665.218	5.40074	100.556		1.86621	0.96434	0.00201474	1.92041e-07	6.66361	0.164876
n5636ox_57	2016-07-10	263	345.484	117.633	51.4385	0.379724	0.340487	770.025	16.0761	104.433		1.7768	0.989792	0.0020194	2.19732e-07	8.99247	0.173377
n5636ox_45	2016-07-10	252	250.861	95.4604	37.7894	0.342783	0.380531	776.457	13.3128	96.0993		1.77984	0.977711	0.00202072	2.21552e-07	9.65063	0.174012
n5639ox_03	25/10/2016	22	490.54	271.491	93.0085	0.542734	0.553452	914.913	8.21547	96.5642		3.00194	0.988511	0.00201732	1.34307e-07	5.00871	0.143234
n5636ox_16	2016-07-10	217	116.954	68.8246	22.6175	0.573305	0.588478	931.375	8.53735	99.9557		1.84612	1.00533	0.00201538	2.72225e-07	6.98164	0.190549
n5636ox_5	2016-07-10	227	507.77	281.07	99.9335	0.568033	0.553539	948.485	7.63829	100.47		1.82853	1.00216	0.00201192	3.26291e-07	5.2526	0.210162
n5636ox_3	2016-07-10	231	853.896	48.4868	148.429	0.0453339	0.056783	958.589	7.84807	100.593		1.8377	0.977474	0.00202061	2.77508e-07	9.59455	0.19265
n5636ox_4	2016-07-10	232	433.941	39.9425	76.7358	0.0904954	0.0920461	961.636	7.87347	99.4289		1.81987	0.967986	0.00201893	1.4747e-07	8.75776	0.153478
n5636ox_26	2016-07-10	207	154.231	52.1004	29.1573	0.324645	0.337808	962.043	8.36187	97.3809		1.81961	0.979574	0.00201889	2.71562e-07	8.73566	0.190483
n5639ox_12	25/10/2016	8	359.804	76.2861	65.9477	0.217997	0.212021	967.054	9.15884	103.287		2.98491	0.98279	0.00202507	1.25341e-07	8.86895	0.141681
n5636ox_37	2016-07-10	234	219.015	90.4041	42.7197	0.412069	0.412775	971.945	8.00184	98.9341		1.83672	0.976951	0.00201593	2.22019e-07	7.25957	0.173909
n5636ox_8	2016-07-10	224	133.777	23.7682	24.454	0.174607	0.17767	972.104	8.22606	100.908		1.82865	1.00223	0.00201846	2.15423e-07	8.52293	0.171999
n5636ox_44	2016-07-10	249	153.045	114.926	32.4301	0.755741	0.75093	972.663	8.14924	99.7584		1.82277	1.00761	0.00201831	1.61002e-07	8.4481	0.156736
n5639ox_15	25/10/2016	16	313.967	66.2878	58.0317	0.221756	0.21113	973.663	8.08424	103.336		2.98319	0.991337	0.00202531	1.35239e-07	8.98699	0.143892
n5639ox_01	25/10/2016	24	277.3	42.2373	50.6152	0.150223	0.152316	975.397	8.44262	99.796		3.00289	0.988824	0.00202712	1.65863e-07	9.89222	0.151586
n5636ox_12	2016-07-10	223	507.834	40.6592	90.8941	0.0793324	0.0800639	976.497	8.02104	101.214		1.8171	0.9959	0.00202028	2.1025e-07	9.43317	0.170521
n5636ox_42	2016-07-10	247	253.748	95.6523	49.1562	0.388228	0.376957	976.93	8.52937	102.58		1.78684	0.98775	0.00201579	1.48665e-07	7.18774	0.153575
n5636ox_21	2016-07-10	211	187.55	84.3812	37.1174	0.460205	0.449914	977.433	8.28549	100.935		1.8111	0.974992	0.00202024	2.93958e-07	9.41219	0.198516
n5636ox_20	2016-07-10	210	247.078	58.7003	46.5786	0.241725	0.237578	983.228	8.13626	100.55		1.81073	0.974794	0.00201524	2.65812e-07	6.91381	0.188313
n5639ox_06	25/10/2016	21	285.058	38.9597	52.3072	0.141148	0.136673	987.663	8.23348	105.192		2.98935	0.984368	0.00202745	1.39691e-07	10.0565	0.145042
n5639ox_07	25/10/2016	9	277.828	48.4108	51.6043	0.176562	0.174248	988.385	8.35941	103.266		3.0025	0.988579	0.00202366	1.73368e-07	8.16936	0.153435
n5636ox_54	2016-07-10	256	402.136	351.293	89.4491	0.919356	0.873568	993.86	8.21191	104.307		1.79936	0.988433	0.00202084	1.66792e-07	9.71009	0.158355
n5639ox_05	25/10/2016	18	141.092	77.6637	29.054	0.560956	0.550448	993.907	9.52793	102.512		2.99215	0.994314	0.00202452	1.95739e-07	8.59716	0.159893
n5639ox_11	25/10/2016	6	320.805	45.5301	60.1392	0.145837	0.141925	1000.82	8.30563	100.325		2.9928	0.985385	0.00202457	1.74309e-07	8.62211	0.153742
n5636ox_53	2016-07-10	255	146.14	49.2486	29.8628	0.332258	0.336995	1030.56	9.06431	97.6522		1.84366	1.01277	0.0020116	2.82877e-07	5.09271	0.194134
n5636ox_39	2016-07-10	238	323.245	164.8	69.723	0.525358	0.509829	1040.2	8.47751	100.228		1.89682	0.980156	0.00201294	2.18022e-07	5.76311	0.17251
n5639ox_09	25/10/2016	5	420.958	370.147	99.5396	0.922598	0.879295	1050.15	8.71963	104.203		2.99163	0.985001	0.00201793	1.15874e-07	5.31278	0.139296
n5636ox_52	2016-07-10	254	385.861	159.727	83.2098	0.415832	0.413949	1064.05	8.66371	99.3528		1.82651	1.00335	0.00201643	2.57778e-07	7.50689	0.185616
n5636ox_55	2016-07-10	260	299.664	141.132	65.9288	0.478931	0.470966	1068.72	9.09068	99.6561		1.75138	0.975631	0.0020137	1.89253e-07	6.14509	0.164028
n5639ox_02	25/10/2016	23	83.8059	43.0923	18.7546	0.531147	0.514192	1079.68	9.96817	102.959		2.99904	0.987559	0.00202143	1.54226e-07	7.05565	0.148258
n5636ox_1	2016-07-10	229	280.221	67.9213	59.4189	0.237366	0.242384	1091.68	9.03944	99.0066		1.87985	0.99989	0.00201912	1.45189e-07	8.85033	0.152956
n5636ox_41	2016-07-10	242	283.208	119.218	65.4945	0.422513	0.420957	1136.43	9.35427	101.945		1.81939	0.940143	0.0020131	1.78032e-07	5.84506	0.16089
n5636ox_51	2016-07-10	253	237.605	103.328	55.8847	0.444021	0.434871	1145.54	9.40611	100.636		1.76758	0.970977	0.00201307	2.45348e-07	5.83044	0.181279
n5636ox_48	2016-07-10	245	82.6032	37.0503	19.6051	0.451708	0.448534	1150.92	10.0328	99.7485		1.78956	0.989253	0.00201734	2.29856e-07	7.96095	0.176456
n5636ox_23	2016-07-10	214	252.711	119.431	61.6986	0.482179	0.472598	1173.88	9.66046	100.382		1.76913	0.963398	0.00201824	1.92059e-07	8.41426	0.165073
n5636ox_27	2016-07-10	203	261.391	120.264	63.8398	0.499249	0.460092	1175.68	11.4691	102.866		1.84907	1.01434	0.00201235	2.23706e-07	5.46895	0.174252
n5636ox_46	2016-07-10	246	197.172	77.2425	49.4965	0.388651	0.391752	1229.28	9.91697	101.451		1.78354	0.985923	0.00201099	1.87048e-07	4.7893	0.163259
n5636ox_31	2016-07-10	201	513.833	191.169	131.364	0.391413	0.372046	1249.08	9.48063	101.853		1.88788	1.03563	0.00201298	1.44629e-07	5.78398	0.152463
n5636ox_2	2016-07-10	230	390.242	128.877	98.6809	0.335228	0.330248	1251.03	9.78671	100.978		1.83033	0.973554	0.00201258	1.53233e-07	5.58474	0.154484
n5636ox_34	2016-07-10	198	240.919	91.5864	62.1776	0.386304	0.380155	1259.06	9.9636	100.656		1.78981	0.981831	0.0020099	3.25602e-07	4.24569	0.209813
n5636ox_18	2016-07-10	216	189.319	53.4069	50.2347	0.263409	0.2821	1311.06	11.5295	91.2926		1.85528	1.01031	0.00201681	3.1533e-07	7.69751	0.206239
n5636ox_32	2016-07-10	199	350.811	144.555	95.8303	0.417982	0.412059	1312.3	10.4481	99.5296		1.78401	0.978651	0.00201317	2.01004e-07	5.87917	0.167387
n5636ox_61	2016-07-10	241	112.058	52.6434	31.6593	0.466279	0.469786	1337.82	10.6184	99.6726		1.80093	0.930604	0.00201468	1.48078e-07	6.63388	0.153371
n5636ox_56	2016-07-10	261	430.613	175.932	121.405	0.407502	0.408562	1351.1	10.1991	99.0717		1.78516	0.994453	0.00201513	2.53041e-07	6.85772	0.18395
n5636ox_24	2016-07-10	209	618.706	170.849	168.783	0.259835	0.276139	1352.28	11.4004	96.4784		1.8128	0.975908	0.00201213	1.70312e-07	5.35728	0.158776
n5639ox_10	25/10/2016	10	116.237	47.0993	33.8321	0.417671	0.4052	1391.71	11.3259	102.176		2.99569	0.986337	0.00202177	1.42651e-07	7.22466	0.145428
n5636ox_38	2016-07-10	237	291.463	109.404	84.8544	0.349152	0.375361	1404.23	11.1145	97.7355		1.96908	1.0175	0.00201405	2.94599e-07	6.3186	0.198468
n5639ox_16	25/10/2016	15	176.338	52.1579	50.6885	0.305774	0.295783	1409.74	11.3035	102.37		3.00222	0.997658	0.00202281	1.86486e-07	7.74164	0.15709
n5636ox_29	2016-07-10	202	489.357	175.005	144.525	0.359004	0.357623	1417.64	11.2999	97.2322		1.86396	1.02251	0.00201673	2.10307e-07	7.65579	0.17035
n5636ox_13	2016-07-10	222	140.083	124.131	48.4685	0.917969	0.886126	1457.85	11.4671	99.6082		1.81158	0.992871	0.00201267	3.55145e-07	5.63071	0.221348
n5636ox_47	2016-07-10	244	564.078	269.654	177.033	0.484193	0.478044	1461.53	11.1538	100.508		1.79496	0.992238	0.00201274	2.56902e-07	5.66443	0.185139
n5636ox_36	2016-07-10	233	184.62	129.68	62.7529	0.714337	0.702417	1493.61	11.6924	99.9247		1.84285	0.98021	0.00201341	2.11003e-07	6.00132	0.170386
n5636ox_50	2016-07-10	259	498.127	246.497	161.372	0.506504	0.494847	1495.64	11.2043	100.78		1.78557	0.994679	0.00201408	2.47313e-07	6.33184	0.181981
n5636ox_49	2016-07-10	257	171.176	89.7322	56.6772	0.535671	0.52421	1514.7	11.475	100.69		1.79962	0.988577	0.00201414	2.25611e-07	6.36456	0.174945
n5636ox_25	2016-07-10	208	454.667	216.495	149.377	0.489468	0.476162	1519.51	11.4955	101.054		1.82397	0.981922	0.00201412	2.48517e-07	6.35596	0.182384
n5636ox_30	2016-07-10	200	435.379	234.561	157.567	0.545093	0.538751	1627.9	12.1746	99.8282		1.9167	1.05144	0.00201438	1.61466e-07	6.48237	0.156626
n5636ox_10	2016-07-10	226	808.655	415.422	291.214	0.52627	0.513719	1628.47	12.0222	100.327		1.82682	1.00123	0.00201967	3.4188e-07	9.12926	0.216466
n5636ox_14	2016-07-10	219	151.753	121.44	58.4703	0.802998	0.800247	1630.84	12.555	98.8971		1.81993	0.991063	0.00201182	2.41157e-07	5.20613	0.179834
n5636ox_35	2016-07-10	196	245.518	90.223	85.9162	0.375335	0.367479	1635.88	12.4348	99.3987		1.80854	0.978688	0.00201318	2.50949e-07	5.88379	0.183151
n5636ox_58	2016-07-10	262	218.231	93.0603	77.8447	0.429814	0.42643	1637.42	13.1416	96.7692		1.75509	0.977698	0.0020127	2.64132e-07	5.64269	0.187611
n5636ox_15	2016-07-10	218	304.445	153.928	111.564	0.506011	0.5056	1655.39	12.2836	99.0176		1.81365	0.98764	0.00201565	2.706e-07	7.11917	0.189994
n5636ox_19	2016-07-10	215	235.165	83.7634	83.3127	0.36376	0.356189	1657.42	12.3219	99.7415		1.81685	0.989382	0.00201653	2.25966e-07	7.55799	0.17518
n5639ox_14	25/10/2016	14	225.943	85.9041	81.1198	0.389771	0.380203	1673	13.1857	102.205		2.98842	0.993074	0.00202278	1.43665e-07	7.7308	0.145727
n5636ox_9	2016-07-10	225	215.507	116.857	80.7555	0.557367	0.542244	1673.81	12.5115	100.423		1.8253	1.00039	0.00201184	2.60959e-07	5.21388	0.18648
n5636ox_22	2016-07-10	212	538.778	194.075	196.275	0.355771	0.360214	1696.91	12.4701	98.8957		1.81453	0.976837	0.00201949	2.20757e-07	9.03507	0.1737
n5636ox_59	2016-07-10	240	172.125	59.0095	62.5659	0.342487	0.342828	1697.5	12.8045	98.5477		1.82977	0.945508	0.00201261	2.57476e-07	5.59898	0.185328
n5639ox_04	25/10/2016	17	225.92	133.168	90.7658	0.604614	0.589448	1761.33	14.5585	101.512		2.98871	0.993171	0.00202137	2.2e-07	7.02449	0.167241
n5639ox_13	25/10/2016	13	198.606	62.7428	140.431	0.324563	0.315916	2832.13	19.6027	101.749		2.99201	0.994267	0.00201776	1.15864e-07	5.22852	0.139284
Sample FR15-28 Skajit Limestone (Dsk): N 67033´40.12´´ W 151006´47.37´´
n5634ox_7	2016-07-10	94	251.228	128.522	32.2365	0.528845	0.511574	643.023	5.96212	100.37		2.07322	0.988885	0.00200981	1.888e-07	4.19974	0.163687
n5634ox_10	2016-07-10	92	259.812	121.613	33.3979	0.484067	0.46808	653.987	5.58039	103.415		2.04756	0.976644	0.00201653	2.26119e-07	7.55914	0.175228
n5634ox_76	2016-07-10	32	175.966	121.244	25.1526	0.706919	0.689022	687.313	6.23607	103.484		2.15187	1.01318	0.00201236	2.28813e-07	5.47561	0.175869
n5634ox_73	2016-07-10	7	265.073	145.457	36.7247	0.563142	0.548743	689.491	6.16054	103.744		2.2091	0.933588	0.00201672	2.35984e-07	7.65497	0.178394
n5634ox_18	2016-07-10	80	227.958	162.93	33.1415	0.699965	0.714736	691.245	5.86602	97.5887		2.07803	0.976023	0.00201611	2.71245e-07	7.34729	0.190241
n5634ox_15	2016-07-10	85	89.5296	43.1754	12.3776	0.466552	0.482247	695.298	6.34985	96.1997		2.08198	1.00048	0.00201475	2.2946e-07	6.66939	0.176197
n5634ox_62	2016-07-10	22	182.142	119.915	26.2226	0.675803	0.658361	695.815	6.15295	102.781		2.10835	0.962369	0.00201542	2.00284e-07	7.00529	0.167297
n5634ox_26	2016-07-10	72	161.784	84.8909	22.8196	0.52178	0.524717	700.784	6.0425	97.6868		2.05117	0.983922	0.00201459	2.37832e-07	6.59132	0.178886
n5634ox_34	2016-07-10	59	457.575	294.093	66.5165	0.660348	0.642721	701.978	5.72949	100.804		2.17718	1.04317	0.00201309	1.67162e-07	5.83873	0.158009
n5634ox_28	2016-07-10	64	799.099	499.225	116.938	0.640518	0.624735	708.899	5.81558	100.315		2.06587	0.98983	0.00202077	2.02193e-07	9.67766	0.168146
n5634ox_5	2016-07-10	95	373.984	147.227	52.5625	0.397079	0.393672	723.722	6.13298	101.327		2.06371	0.984346	0.00202075	1.70095e-07	9.66653	0.159208
n5634ox_24	2016-07-10	73	293.069	182.362	60.1373	0.618474	0.622248	972.554	8.25546	99.5275		2.05844	0.987411	0.00201852	2.35546e-07	8.55357	0.178343
n5634ox_66	2016-07-10	14	338.928	893.099	104.525	2.63232	2.63507	978.968	8.18854	98.7208		2.08504	0.946273	0.00201384	2.04645e-07	6.21335	0.168499
n5634ox_8	2016-07-10	93	451.107	280.656	96.7432	0.606057	0.622151	1011.53	8.24221	97.863		2.06943	0.987074	0.00201301	1.92915e-07	5.798	0.165031
n5634ox_54	2016-07-10	30	122.136	40.0693	24.3766	0.320206	0.328072	1014.39	8.75902	99.2585		2.1087	0.992852	0.0020142	1.37195e-07	6.39322	0.150845
n5634ox_58	2016-07-10	24	103.987	40.9464	21.2276	0.392977	0.393765	1015.83	9.23828	98.0897		2.11491	0.965364	0.00201456	1.81428e-07	6.57534	0.161897
n5634ox_64	2016-07-10	18	312.087	118.091	63.7695	0.369684	0.378391	1022.42	9.23264	98.1891		2.24919	1.02077	0.00201524	1.69601e-07	6.91536	0.158766
n5634ox_53	2016-07-10	36	146.249	63.6411	30.3292	0.431888	0.435155	1025.23	8.82279	100.32		2.08487	0.99183	0.00201511	2.18846e-07	6.85065	0.172879
n5634ox_1	2016-07-10	101	182.4	68.8395	37.3755	0.376283	0.377409	1025.34	8.54264	99.2886		2.0977	1.00229	0.00201703	1.53957e-07	7.80909	0.154919
n5634ox_45	2016-07-10	45	128.854	131.68	30.5066	1.01519	1.02193	1025.74	9.02525	101.727		2.15614	1.00112	0.00201188	2.11772e-07	5.2354	0.170538
n5634ox_60	2016-07-10	23	181.141	90.76	38.5666	0.493563	0.501045	1033.47	8.66842	99.2964		2.10806	0.962236	0.00201382	1.37157e-07	6.20398	0.150814
n5634ox_48	2016-07-10	44	162.721	131.436	37.2707	0.816827	0.807739	1034	8.70711	101.021		2.12786	0.987995	0.00201339	1.47968e-07	5.98725	0.153269
n5634ox_40	2016-07-10	48	127.883	41.1056	26.1005	0.3073	0.321431	1035.92	8.91575	97.8824		2.12865	0.988362	0.00201775	2.4524e-07	8.17022	0.181476
n5634ox_20	2016-07-10	78	208.291	87.0529	44.571	0.418142	0.417939	1055.54	8.86906	99.0474		2.10243	0.98748	0.00201651	2.90802e-07	7.5494	0.197205
n5634ox_70	2016-07-10	9	362.865	254.023	84.4565	0.705481	0.700048	1071.92	9.00706	100.289		2.17904	0.920887	0.0020145	2.37628e-07	6.543	0.178815
n5634ox_50	2016-07-10	39	82.3536	80.0677	20.4956	0.970126	0.972243	1077.75	9.60918	99.9259		2.25968	1.07499	0.00201481	1.9221e-07	6.69863	0.164929
n5634ox_27	2016-07-10	70	199.73	80.9818	43.7817	0.404624	0.405456	1082.67	9.06169	99.4245		2.07754	0.996573	0.00201768	1.38287e-07	8.13349	0.151296
n5634ox_36	2016-07-10	57	160.889	73.9679	36.4765	0.465175	0.459743	1101.74	9.60093	99.8685		2.10548	0.978859	0.00201498	1.56852e-07	6.78332	0.155509
n5634ox_31	2016-07-10	62	183.225	83.8526	42.6755	0.454842	0.457649	1130.63	9.56037	99.5953		2.12098	1.01624	0.00201662	1.52636e-07	7.60237	0.154574
n5634ox_47	2016-07-10	40	100.06	33.7048	22.8241	0.333746	0.336847	1143.5	10.2623	101.227		2.19562	1.04452	0.00201682	2.41785e-07	7.70355	0.18029
n5634ox_22	2016-07-10	75	177.6	99.0704	43.4611	0.546519	0.557828	1154.8	9.99169	98.2624		2.23975	1.05198	0.00201822	1.98648e-07	8.40442	0.16697
n5634ox_33	2016-07-10	56	311.8	96.5035	72.1698	0.306522	0.309505	1159.07	9.62532	97.8925		2.09795	0.975354	0.00201991	1.37713e-07	9.24646	0.151301
n5634ox_43	2016-07-10	47	473.211	59.4483	105.807	0.157617	0.125628	1162.43	9.84367	96.7944		2.1366	0.992053	0.00201884	1.9289e-07	8.71321	0.165343
n5634ox_49	2016-07-10	38	167.148	74.8529	40.1937	0.446911	0.447825	1163	9.76058	98.6064		2.09753	0.997856	0.00201296	2.30472e-07	5.77215	0.176429
n5634ox_46	2016-07-10	41	109.213	38.3107	25.5934	0.346155	0.350788	1163.72	10.5903	99.0899		2.1544	1.02491	0.00201971	2.06218e-07	9.14516	0.169281
n5634ox_2	2016-07-10	103	272.963	118.246	65.7385	0.435225	0.433195	1170.83	10.0519	100.02		2.11831	1.01213	0.00201964	1.9003e-07	9.11392	0.164574
n5634ox_14	2016-07-10	86	72.0227	20.6168	16.7195	0.285298	0.286254	1171.33	10.6394	99.6995		2.08541	1.00213	0.00201777	2.08244e-07	8.17945	0.169784
n5634ox_52	2016-07-10	37	189.041	180.55	52.3594	0.951651	0.955081	1188.39	10.0871	99.1214		2.08307	0.990973	0.00201109	2.32782e-07	4.84168	0.177075
n5634ox_71	2016-07-10	6	200.304	76.8385	50.5997	0.39137	0.383609	1233.54	9.66705	100.243		2.21251	0.93503	0.00201199	2.13831e-07	5.2885	0.171171
n5634ox_65	2016-07-10	15	850.956	425.517	228.5	0.439345	0.500045	1268.32	10.9125	90.0847		2.10648	0.956007	0.00201617	1.37319e-07	7.37766	0.15099
n5634ox_21	2016-07-10	77	160.068	66.789	42.2514	0.422405	0.417255	1274.63	9.96023	100.908		2.12309	0.997187	0.00201084	2.06566e-07	4.71626	0.168912
n5634ox_79	2016-07-10	5	94.2065	25.5228	24.4555	0.262052	0.270924	1299.64	10.6213	100.02		2.24972	0.950754	0.00201364	1.6436e-07	6.1118	0.157319
n5634ox_4	2016-07-10	99	412.163	335.923	124.962	0.827093	0.815026	1317.23	10.0869	97.9353		2.04296	0.976126	0.00201478	1.48189e-07	6.68512	0.153404
n5634ox_25	2016-07-10	71	77.2868	51.6589	22.6457	0.684066	0.668405	1320.06	11.0739	99.6191		2.07984	0.997674	0.0020143	2.83359e-07	6.4428	0.194432
n5634ox_35	2016-07-10	55	169.962	68.7578	46.7534	0.401636	0.404549	1325.53	10.7127	99.8463		2.11204	0.981906	0.00201241	2.48675e-07	5.49997	0.182352
n5634ox_39	2016-07-10	53	107.331	54.1004	30.9187	0.51145	0.504054	1349.07	10.7664	100.293		2.16519	1.00662	0.00201347	2.06582e-07	6.03134	0.169057
n5634ox_16	2016-07-10	84	203.142	112.251	59.4103	0.540474	0.552574	1354.35	10.3764	98.2753		2.08261	1.00079	0.00201403	2.28373e-07	6.31052	0.175815
n5634ox_23	2016-07-10	76	184.708	64.6919	51.696	0.343704	0.350239	1361.12	10.4784	99.0225		2.1442	1.0071	0.00201346	1.36032e-07	6.02522	0.150542
n5634ox_56	2016-07-10	29	209.934	108.179	61.7969	0.521894	0.515301	1369.64	10.5144	99.3267		2.0938	0.985834	0.00201543	1.62029e-07	7.00816	0.156829
n5634ox_78	2016-07-10	63	176.242	70.7819	50.3464	0.389051	0.401619	1369.73	10.6861	97.8393		2.06982	0.991724	0.00201516	1.55139e-07	6.8735	0.155099
n5634ox_67	2016-07-10	16	128.327	51.8683	36.9643	0.397142	0.404189	1381.73	11.4685	100.278		2.14532	0.973632	0.00201486	1.65016e-07	6.72324	0.157557
n5634ox_74	2016-07-10	4	264.382	77.8288	74.2578	0.292759	0.29438	1383.32	11.1579	100.792		2.29641	0.970486	0.00201386	2.24884e-07	6.22609	0.174701
n5634ox_12	2016-07-10	90	208.552	98.3502	61.7055	0.464044	0.471586	1392.53	11.9084	99.3513		2.07676	0.990572	0.00201666	1.80203e-07	7.62085	0.161679
n5634ox_30	2016-07-10	69	177.22	75.1298	52.187	0.436528	0.423935	1395.67	10.7871	99.7459		2.06946	0.992696	0.00201643	2.59508e-07	7.5103	0.186206
n5634ox_44	2016-07-10	46	68.3732	43.5998	21.7698	0.663691	0.637674	1430.54	12.5229	101.762		2.13392	0.990805	0.00201377	1.9209e-07	6.17987	0.164838
n5634ox_32b	2016-07-10	60	202.982	116.947	63.6979	0.58208	0.576144	1431.65	11.0508	100.07		2.19073	1.04966	0.00201617	1.58327e-07	7.38027	0.155944
n5634ox_69	2016-07-10	13	222.512	163.336	73.0126	0.739159	0.734054	1444.44	11.4197	100.837		2.11795	0.961213	0.00201204	1.86177e-07	5.31636	0.163073
n5634ox_38	2016-07-10	52	351.965	211.379	114.891	0.585366	0.600567	1458.39	10.969	92.0796		2.16872	1.00826	0.00202076	1.51634e-07	9.67217	0.154575
n5634ox_63	2016-07-10	20	189.964	92.9189	59.789	0.490623	0.489139	1463.12	11.3593	100.485		2.15323	0.982852	0.00201693	2.20632e-07	7.75602	0.173528
n5634ox_19	2016-07-10	79	248.801	120.776	78.7042	0.486618	0.485431	1470.53	11.2826	100.413		2.07388	0.974071	0.00201298	2.83387e-07	5.78276	0.19438
n5634ox_37	2016-07-10	54	73.3044	18.6302	22.2099	0.247071	0.254148	1484.55	13.4218	97.1233		2.1101	0.981006	0.00201527	2.86195e-07	6.92934	0.19549
n5634ox_32a	2016-07-10	61	211.628	167.256	80.3236	0.785933	0.79033	1613.17	12.1375	98.2533		2.11868	1.01513	0.00201619	1.9917e-07	7.38889	0.167012
n5634ox_59	2016-07-10	25	247.638	109.799	87.4652	0.435502	0.443386	1627.64	12.514	98.9435		2.12416	0.969585	0.00201134	3.32871e-07	4.9646	0.212648
n5634ox_17	2016-07-10	83	170.29	192.788	70.421	1.12624	1.13212	1630.77	12.3526	98.2866		2.07808	0.998608	0.00201419	2.91258e-07	6.39034	0.197263
n5634ox_61	2016-07-10	21	116.476	165.659	51.1008	1.42824	1.42226	1636.23	13.1644	99.8191		2.1462	0.979643	0.00200823	1.78872e-07	3.40869	0.160846
n5634ox_55	2016-07-10	31	98.9658	125.409	42.2765	1.26202	1.2672	1644.41	13.6286	99.8087		2.11189	0.994351	0.00201865	1.65081e-07	8.61779	0.157791
n5634ox_68	2016-07-10	17	224.578	177.205	87.9813	0.782324	0.789058	1663.21	12.7481	99.7354		2.30883	1.04784	0.00201328	2.5869e-07	5.93292	0.185773
n5634ox_9	2016-07-10	91	188.088	164.063	75.217	0.872967	0.872264	1667.14	12.533	100.474		2.06084	0.98298	0.00201441	2.27522e-07	6.49676	0.175563
n5634ox_51	2016-07-10	33	203.684	157.181	89.6161	0.765329	0.771689	1839.16	13.6498	100.187		2.12168	0.998963	0.00201772	1.36858e-07	8.15136	0.15098
n5634ox_6	2016-07-10	102	147.975	103.56	64.5069	0.714171	0.699843	1842.83	13.8718	100.41		2.15913	1.03163	0.00201764	2.3801e-07	8.1145	0.179098
n5634ox_11	2016-07-10	88	348.477	109.139	144.495	0.312112	0.313189	1904.22	14.0577	99.8638		2.06899	0.994243	0.0020183	1.48218e-07	8.44052	0.153617
n5634ox_29	2016-07-10	68	321.06	226.386	160.808	0.703575	0.705121	2060.07	15.3713	99.3148		2.05152	0.984091	0.00201294	1.84776e-07	5.7659	0.162732
n5634ox_41	2016-07-10	49	162.088	71.089	81.9093	0.433662	0.438583	2167.19	16.3032	97.8702		2.12774	0.987938	0.0020171	2.08595e-07	7.84257	0.169854
n5634ox_57	2016-07-10	28	88.7172	64.2773	51.6968	0.733157	0.724519	2312.3	17.4123	100.6		2.14692	1.01085	0.00201038	2.50981e-07	4.48531	0.183024
n5634ox_13	2016-07-10	87	63.9357	36.9177	41.8589	0.549266	0.57742	2561.77	22.7868	95.7557		2.07232	0.995844	0.00201283	1.3827e-07	5.70881	0.151003
n5634ox_72	2016-07-10	8	141.547	102.623	95.4981	0.720043	0.725005	2577.12	18.6285	99.6894		2.16836	0.916371	0.00201232	2.47836e-07	5.45713	0.182068
Sample FR15-37 Hunt Fork Shale (Dhf): N 67027´25.80´´ W 150054´28.14´´
n5641ox_02	25/10/2016	172	80.776	34.6703	5.9214	0.496174	0.429215	385.368	4.18844	112.093		2.95325	0.987664	0.00201761	1.16592e-07	5.15314	0.139423
n5641ox_70	25/10/2016	84	269.61	128.27	20.2846	0.463577	0.475761	390.521	4.12583	96.9181		3.05967	0.97607	0.00202031	1.1467e-07	6.50043	0.13919
n5641ox_72	25/10/2016	81	1840.2	440.25	130.24	0.229641	0.23924	392.527	6.99021	98.9166		3.06613	0.97813	0.00202267	1.73354e-07	7.67233	0.153379
n5641ox_03	25/10/2016	171	237.641	147.757	18.9132	0.591731	0.621766	398.619	3.52738	96.2571		2.96114	0.990304	0.00201782	2.45599e-07	5.26007	0.175538
n5641ox_11	25/10/2016	160	336.191	203.293	26.6443	0.58214	0.604693	400.043	3.56891	99.3169		2.99471	0.991411	0.00201644	1.15758e-07	4.57143	0.139187
n5641ox_50	25/10/2016	108	211.556	197.27	18.218	0.981183	0.932468	401.169	3.5338	106.294		2.96314	0.976577	0.0020175	1.74893e-07	5.0959	0.153534
n5641ox_01	25/10/2016	173	307.881	202.939	24.8758	0.632194	0.659148	401.692	3.55595	98.0222		2.95207	0.98727	0.00201739	1.29534e-07	5.04172	0.142163
n5641ox_49	25/10/2016	111	169.365	151.298	14.6649	1.01916	0.893326	405.243	3.69273	112.41		2.95689	0.987944	0.00201939	1.34754e-07	6.04143	0.143451
n5641ox_56	25/10/2016	100	615.534	372.83	49.5826	0.630804	0.605702	405.48	3.35298	105.124		2.99523	0.980862	0.00201642	1.46626e-07	4.55936	0.146095
n5641ox_20	25/10/2016	148	195.528	224.351	17.9204	1.07028	1.14741	405.602	3.61784	94.235		3.02364	0.990209	0.00202202	1.72908e-07	7.35123	0.153223
n5641ox_73a	25/10/2016	80	600.466	522.999	51.8579	0.880823	0.870988	406.035	3.4399	100.448		3.06943	0.979183	0.00202163	1.61168e-07	7.15492	0.150055
n5641ox_21	25/10/2016	146	210.784	140.951	17.3278	0.610881	0.6687	407.883	4.05767	94.3937		3.02443	0.990468	0.00202098	1.46326e-07	6.8338	0.146271
n5641ox_59	25/10/2016	97	191.449	103.436	15.3143	0.496962	0.540279	409.206	3.64862	94.5491		2.99581	0.981053	0.00202072	1.87562e-07	6.70044	0.157295
n5641ox_76	25/10/2016	73	129.555	66.4928	10.3031	0.479221	0.51324	409.335	3.79426	95.3709		3.06715	0.979382	0.00201847	1.14478e-07	5.58153	0.139045
n5641ox_25	25/10/2016	144	150.745	159.16	13.7029	1.04868	1.05582	410.522	3.73112	99.9287		3.02189	0.989634	0.00202179	1.49442e-07	7.23352	0.14708
n5641ox_14	25/10/2016	155	807.353	308.265	62.1001	0.353835	0.381821	410.6	3.74553	97.036		3.01887	0.993406	0.00201902	1.42474e-07	5.8572	0.145235
n5641ox_30	25/10/2016	137	86.1046	34.1758	6.69478	0.385509	0.396911	411.031	5.87241	96.2827		3.01245	0.987857	0.00201817	1.61913e-07	5.4314	0.150065
n5641ox_58	25/10/2016	99	515.071	370.933	43.2875	0.728344	0.720159	411.338	3.42098	102.697		2.99971	0.982329	0.00201981	1.82749e-07	6.25001	0.155864
n5641ox_79	25/10/2016	71	288.83	249.754	25.2954	0.934092	0.86471	411.362	3.60324	105.693		3.06838	0.979775	0.00201853	1.54194e-07	5.61278	0.148093
n5641ox_22	25/10/2016	147	179.059	111.896	14.7556	0.621951	0.624914	411.976	3.80447	100.162		3.03657	0.994442	0.00201971	1.63493e-07	6.20151	0.150564
n5641ox_55	25/10/2016	104	392.699	378.499	35.1782	0.988059	0.963842	412.115	3.54751	101.909		2.98129	0.982557	0.0020193	1.51143e-07	5.99443	0.147367
n5641ox_77	25/10/2016	72	429.787	237.468	34.8354	0.564263	0.552525	412.316	3.60942	101.96		3.06704	0.979344	0.00201977	1.16567e-07	6.22737	0.139542
n5641ox_57	25/10/2016	98	572.993	258.82	45.2349	0.471505	0.451699	413.142	3.40066	105.684		2.99068	0.979371	0.00201744	2.04364e-07	5.06859	0.162148
n5641ox_38	25/10/2016	124	225.471	122.616	18.2944	0.534606	0.543824	413.197	3.66326	98.0366		2.97169	0.99456	0.00201953	1.58781e-07	6.10911	0.149321
n5641ox_47	25/10/2016	114	604.318	390.489	50.203	0.669552	0.646164	413.466	3.42254	104.302		2.94921	0.985379	0.00201944	1.16735e-07	6.06526	0.139557
n5641ox_65	25/10/2016	90	427.189	238.548	34.6262	0.549707	0.558412	413.48	3.64795	101.484		3.0299	0.976081	0.00202085	1.35327e-07	6.76804	0.143664
n5641ox_39	25/10/2016	123	972.302	652.186	81.579	0.713446	0.670764	414.454	3.35265	105.941		2.95352	0.988479	0.00201847	1.26828e-07	5.58245	0.14163
n5641ox_42	25/10/2016	120	438.432	209.671	34.926	0.50585	0.478229	414.462	3.67796	107.703		2.96279	0.991581	0.00201758	1.16406e-07	5.1403	0.139384
n5641ox_67	25/10/2016	88	412.918	327.717	35.7164	0.717455	0.793661	414.485	3.6117	91.5066		3.02495	0.974488	0.00201962	1.79609e-07	6.15526	0.154963
n5641ox_53	25/10/2016	105	535.702	280.397	43.4096	0.523504	0.523419	415.136	3.67623	100.08		2.96906	0.978528	0.00201908	1.37133e-07	5.8875	0.143982
n5641ox_37	25/10/2016	128	259.186	152.865	21.3791	0.625358	0.589787	415.333	3.55285	105.029		3.00315	0.993237	0.0020193	1.40388e-07	5.99575	0.144755
n5641ox_44	25/10/2016	116	1044.61	629.877	86.2863	0.63621	0.602977	416.266	3.4742	107.195		2.94158	0.982829	0.00201894	1.99502e-07	5.81742	0.160743
n5641ox_17	25/10/2016	152	400.35	219.716	32.6278	0.542553	0.54881	416.339	3.48599	101.426		3.02378	0.995021	0.00201858	1.60713e-07	5.63746	0.149773
n5641ox_74	25/10/2016	75	532.532	169.447	41.1822	0.311762	0.318191	417.092	3.62822	96.4252		3.07238	0.981052	0.00201911	2.04307e-07	5.89949	0.162213
n5641ox_31	25/10/2016	136	521.618	282.432	42.5136	0.582395	0.541455	417.335	3.51712	109.478		3.03747	0.996062	0.00202245	2.22302e-07	7.56666	0.168032
n5641ox_68	25/10/2016	87	607.99	246.348	48.0876	0.428957	0.405184	417.945	3.46701	105.31		3.04294	0.980282	0.0020192	2.1174e-07	5.94327	0.164521
n5641ox_36	25/10/2016	129	280.522	171.7	23.426	0.655266	0.612072	418.949	3.7699	107.311		3.01713	0.997862	0.00201867	1.46121e-07	5.68193	0.146095
n5641ox_35	25/10/2016	130	909.472	511.31	75.3629	0.57811	0.562205	420.239	3.54004	102.627		3.00916	0.995228	0.0020214	1.72903e-07	7.04003	0.153189
n5641ox_54	25/10/2016	103	218.377	144.346	18.446	0.673554	0.660992	420.35	4.9439	105.115		2.99559	0.98727	0.00202028	1.52643e-07	6.48396	0.147796
n5641ox_61	25/10/2016	96	477.69	119.978	36.4746	0.254461	0.251163	420.452	3.58757	101.558		2.99802	0.981774	0.00201826	1.63246e-07	5.47716	0.150421
n5641ox_75	25/10/2016	74	495.264	495.104	45.7788	0.98599	0.999677	420.47	3.53746	97.5028		3.06305	0.978073	0.00201928	1.8674e-07	5.98637	0.156984
n5641ox_66	25/10/2016	89	521.256	319.678	43.5441	0.635074	0.613284	420.565	3.64114	106.641		3.02176	0.973458	0.00201856	1.15303e-07	5.62843	0.139217
n5641ox_73b	25/10/2016	79	716.07	227.037	55.8519	0.349151	0.317059	422.467	5.20512	110.176		3.05682	0.975159	0.0020191	1.44212e-07	5.8972	0.145656
n5641ox_64	25/10/2016	91	581.776	309.51	48.1025	0.515168	0.53201	422.863	4.84146	98.1054		3.01956	0.972752	0.0020187	1.30836e-07	5.69818	0.142527
n5641ox_05	25/10/2016	165	708.565	338.582	57.5413	0.515234	0.477841	422.968	3.49765	110.813		2.98077	0.986797	0.00202108	1.59615e-07	6.88088	0.14962
n5641ox_23	25/10/2016	145	525.475	194.591	41.7038	0.395849	0.370315	423.935	3.53213	107.98		3.02757	0.991495	0.00201809	1.68186e-07	5.39163	0.151731
n5641ox_41	25/10/2016	121	137.418	123.468	12.4672	0.847753	0.898485	424.413	3.86797	95.6403		2.95574	0.989221	0.0020196	1.86908e-07	6.14624	0.157049
n5641ox_40	25/10/2016	122	851.442	647.219	75.0551	0.798295	0.760145	426.157	3.52399	105.427		2.94787	0.986589	0.00202179	1.81757e-07	7.23736	0.155684
n5641ox_29	25/10/2016	140	1773.64	1655.25	162.997	0.967527	0.933255	427.572	3.43107	105.337		3.04476	0.998454	0.00201845	1.99084e-07	5.5703	0.160592
n5641ox_46	25/10/2016	115	168.006	58.6105	13.9821	0.340522	0.348861	444.79	4.04961	97.7127		2.95426	0.987066	0.00201719	1.16562e-07	4.94397	0.139393
n5641ox_48	25/10/2016	112	341.957	254.793	33.9784	0.769708	0.745103	481.961	4.02399	106.202		2.94449	0.983801	0.00201573	1.89743e-07	4.21471	0.157678
n5641ox_16	25/10/2016	153	824.018	356.468	76.0962	0.440496	0.432598	482.553	3.90609	103.417		3.02311	0.994802	0.00201683	1.15233e-07	4.76399	0.139103
n5641ox_52	25/10/2016	106	849.663	324.181	81.0356	0.378906	0.381541	504.434	4.15688	102.154		2.97774	0.981389	0.00202427	1.16316e-07	8.4693	0.139749
n5641ox_15	25/10/2016	154	960.211	329.807	91.3991	0.346914	0.343474	507.38	4.25679	101.933		3.01541	0.992268	0.00202591	1.4869e-07	9.29039	0.14712
n5641ox_06	25/10/2016	169	76.6157	41.2137	8.82359	0.534144	0.537927	579.05	5.68151	99.5717		2.96315	0.990976	0.00201706	1.29559e-07	4.88105	0.142151
n5641ox_33	25/10/2016	131	280.965	53.3565	30.7185	0.201423	0.189904	599.016	5.45985	99.3512		3.01086	0.995787	0.00202416	1.95765e-07	8.41804	0.159882
n5641ox_62	25/10/2016	92	257.249	111.737	30.8156	0.445027	0.434354	617.525	5.45445	103.476		3.01925	0.972649	0.00202658	1.39654e-07	9.62117	0.144985
n5641ox_19	25/10/2016	149	119.713	113.051	16.9089	0.905893	0.944348	644.592	6.21783	99.1672		3.02545	0.990802	0.00202246	1.62718e-07	7.56882	0.150505
n5641ox_32	25/10/2016	133	230.928	114.109	29.482	0.476144	0.494133	645.509	5.57342	97.8707		3.03006	1.00214	0.00201989	1.93048e-07	6.28981	0.158861
n5641ox_45	25/10/2016	113	337.724	37.0022	39.508	0.114025	0.109563	654.373	5.53195	102.016		2.93891	0.981937	0.00202561	1.63937e-07	9.13996	0.150995
n5641ox_13	25/10/2016	156	290.024	117.068	36.8273	0.419467	0.403649	657.725	5.49132	105.008		3.01249	0.991307	0.00202331	1.38063e-07	7.99427	0.144433
n5641ox_26	25/10/2016	141	398.385	171.619	52.4074	0.424357	0.430787	675.296	5.57116	100.784		3.04436	0.998323	0.0020205	1.57588e-07	6.59403	0.149066
n5641ox_08	25/10/2016	163	105.93	78.0862	15.125	0.747487	0.737149	678.483	6.13842	101.977		2.99528	0.9916	0.00202084	1.73677e-07	6.76131	0.153373
n5641ox_07	25/10/2016	164	429.945	149.175	55.7294	0.344931	0.346964	678.713	5.62171	100.487		2.99701	0.992171	0.00202066	1.24925e-07	6.67388	0.141342
n5641ox_51	25/10/2016	107	248.389	20.9365	44.2897	0.0848549	0.084289	970.951	8.73839	100.218		2.97299	0.979824	0.00202751	1.23243e-07	10.0856	0.141371
n5641ox_04	25/10/2016	170	142.506	28.9401	26.2906	0.200181	0.203081	973.88	8.54682	100.604		2.95509	0.988279	0.00202803	1.5889e-07	10.3424	0.149805
n5641ox_12	25/10/2016	157	291.917	31.66	52.8538	0.103544	0.108456	981.094	8.05941	101.462		3.012	0.991145	0.00202799	2.49051e-07	10.3246	0.177179
n5641ox_60	25/10/2016	95	182.533	64.0202	35.3555	0.347252	0.350733	982.462	8.67742	100.201		2.99135	0.979591	0.00202529	1.35242e-07	8.97672	0.143892
n5641ox_43	25/10/2016	119	370.237	209.487	75.9198	0.568435	0.565818	987.973	8.10384	102.237		2.95713	0.989689	0.00202731	1.16809e-07	9.9861	0.140023
n5641ox_28	25/10/2016	139	155.144	26.1028	28.8304	0.160538	0.168248	989.572	8.68859	100.472		3.02717	0.992684	0.00202773	1.4973e-07	10.196	0.147475
n5641ox_71	25/10/2016	83	110.129	106.794	24.6687	0.949825	0.969719	991.649	11.0386	103.246		3.0618	0.976749	0.00202562	1.16787e-07	9.14305	0.139922
n5641ox_78	25/10/2016	70	207.526	52.1978	39.6869	0.266232	0.251524	996.455	8.93767	105.362		3.07358	0.981435	0.00202805	1.37011e-07	10.3557	0.144452
n5641ox_09	25/10/2016	162	159.861	55.7634	32.9287	0.349708	0.348824	1040.98	8.81842	101.99		3.0089	0.996108	0.00202147	1.29374e-07	7.0749	0.142357
n5641ox_10	25/10/2016	161	235.002	73.7626	51.8445	0.305548	0.313881	1101.02	11.1932	92.8068		2.99934	0.992946	0.00202715	1.61655e-07	9.90733	0.150477
n5641ox_27	25/10/2016	138	374.909	179.143	112.995	0.450643	0.477831	1416.57	11.0688	98.2388		3.01962	0.990209	0.00202052	2.04685e-07	6.60361	0.162399
n5641ox_34	25/10/2016	132	306.837	285.089	215.543	0.817734	0.929123	2573.57	19.887	93.934		3.00957	0.995363	0.00201794	2.12291e-07	5.31583	0.164632
Sample FR15-36 Chloritic & Carbonate Rocks (Dc): N 67027´44.84´´ W 150051´47.21´´
n5635ox_71	2016-07-10	164	3322	4679.97	283.01	1.21545	1.40878	379.441	4.34312	107.615		1.84963	0.942796	0.0020141	2.75515e-07	6.34198	0.191642
n5635ox_9	2016-07-10	118	688.593	554.836	55.3781	0.779825	0.805753	385.789	3.84779	97.8377		2.01338	0.983197	0.00201376	2.1064e-07	6.17385	0.170294
n5635ox_35	2016-07-10	148	209.709	120.621	16.0552	0.769431	0.575185	390.224	4.13622	134.35		1.98316	1.00001	0.00201507	1.41337e-07	6.82714	0.15183
n5635ox_12	2016-07-10	115	591.351	229.298	43.428	0.373873	0.387753	390.466	3.99538	96.7146		2.00993	0.981512	0.00201704	2.29892e-07	7.81533	0.176452
n5635ox_30	2016-07-10	145	250.457	139.969	19.2925	0.525646	0.558856	391.014	4.13347	93.5674		1.95454	0.985573	0.00201515	2.25736e-07	6.86874	0.175036
n5635ox_51	2016-07-10	183	578.023	344.334	45.0028	0.645241	0.59571	391.129	3.96669	105.248		1.82952	0.988827	0.00201202	2.24328e-07	5.30407	0.174431
n5635ox_26	2016-07-10	132	437.093	196.388	32.6208	0.462768	0.449305	392.577	3.98364	106.583		2.01646	0.975356	0.00202053	2.93644e-07	9.55923	0.198416
n5635ox_68	2016-07-10	161	125.272	73.295	9.80601	0.657076	0.585086	394.16	4.50394	108.563		1.88175	0.959166	0.00201998	2.38798e-07	9.28254	0.179472
			320.843	161.698	24.4975	0.501659	0.503978	394.008	4.06087	99.8851
n5635ox_67	2016-07-10	165	377.539	235.989	29.8208	0.691141	0.625072	394.563	4.34615	108.495		1.84793	0.94193	0.00201476	2.31827e-07	6.67237	0.176954
n5635ox_8	2016-07-10	111	926.041	501.296	71.7282	0.545813	0.541332	395.869	4.05486	101.057		1.99419	0.95811	0.002015	1.50572e-07	6.79155	0.153983
n5635ox_14	2016-07-10	123	231.945	120.569	17.9986	0.572374	0.519815	398.276	4.17573	108.332		2.03065	1.01426	0.00201271	1.39638e-07	5.64735	0.151304
n5635ox_38	2016-07-10	188	262.958	150.575	20.7061	0.612589	0.572622	398.445	4.69121	105.27		1.90072	1.02731	0.00201694	2.51709e-07	7.76197	0.183591
n5635ox_56	2016-07-10	172	400.328	227.717	31.7017	0.558351	0.568827	401.391	4.51453	98.2664		1.99051	1.06235	0.00201169	2.33887e-07	5.14182	0.177461
n5635ox_59	2016-07-10	178	561.852	356.483	45.0509	0.753167	0.634479	402.207	4.02324	120.391		1.8571	0.969996	0.00201524	1.67328e-07	6.91282	0.158175
n5635ox_25	2016-07-10	134	177.395	98.5479	14.2707	0.515317	0.555527	406.963	4.54559	90.968		1.99675	0.96582	0.00201201	2.76276e-07	5.30146	0.191813
n5635ox_37	2016-07-10	147	340.229	323.453	30.3313	1.00478	0.950693	411.873	4.26799	105.286		1.97768	0.997245	0.00201567	2.1412e-07	7.1303	0.171454
n5635ox_20	2016-07-10	131	459.107	230.511	36.8218	0.488883	0.502085	412.449	4.19553	96.6179		2.01932	0.97674	0.00201759	2.3329e-07	8.08963	0.177568
n5635ox_17	2016-07-10	122	381.981	296.588	32.6848	0.761609	0.776446	412.515	4.20882	99.1872		1.97111	0.984522	0.00201511	2.14935e-07	6.84938	0.171674
n5635ox_74	2016-07-10	155	619.723	302.083	50.0364	0.504269	0.487448	416.63	4.23567	101.69		1.86839	0.963956	0.00202087	1.94107e-07	9.72648	0.165802
n5635ox_48	2016-07-10	193	631.133	260.066	49.8911	0.45957	0.412062	416.889	4.17339	109.79		1.87042	1.01218	0.00201576	2.22298e-07	7.17151	0.173987
n5635ox_80	2016-07-10	150	255.728	120.378	20.4314	0.516179	0.470726	416.971	4.36491	112.183		1.92501	0.970683	0.00201266	1.98492e-07	5.62573	0.166624
n5635ox_60	2016-07-10	171	551.159	344.968	46.2886	0.720593	0.625896	417.953	4.1763	111.469		2.04036	1.08896	0.00201453	2.23121e-07	6.5587	0.174182
n5635ox_33	2016-07-10	139	976.408	775.329	85.6178	0.839846	0.794062	419.131	4.20533	104.216		2.14909	1.03951	0.00201317	2.44303e-07	5.88168	0.180938
n5635ox_78	2016-07-10	153	242.436	161.227	20.7155	0.588153	0.665032	420.791	4.54561	88.3766		1.89682	0.978624	0.00201701	3.20964e-07	7.79658	0.208364
n5635ox_66	2016-07-10	167	162.609	43.6956	12.8563	0.266241	0.268716	430.57	4.7505	94.7315		1.8251	0.97407	0.00201162	2.26708e-07	5.10722	0.175162
n5635ox_75	2016-07-10	156	281.133	119.535	23.1662	0.422808	0.425192	431.498	4.61413	98.1318		1.92792	0.994667	0.00201306	2.32988e-07	5.82684	0.177241
n5635ox_22	2016-07-10	126	175.126	59.2783	14.2642	0.335451	0.33849	436.323	4.61196	97.8046		2.1282	1.06298	0.00201276	2.64979e-07	5.6732	0.187906
n5635ox_23	2016-07-10	129	182.968	37.9468	15.194	0.22788	0.207396	461.44	5.01307	108.735		2.03937	0.986434	0.00201106	1.9242e-07	4.82717	0.164784
n5635ox_45	2016-07-10	194	136.742	41.7111	12.0277	0.328026	0.305035	476.463	5.12124	109.885		1.90419	1.03045	0.00201011	1.80776e-07	4.35062	0.161471
n5635ox_42	2016-07-10	186	274.62	90.0963	25.5512	0.358758	0.328076	498.817	5.18683	109.119		1.88119	1.01675	0.00201892	2.99611e-07	8.75453	0.200515
n5635ox_65	2016-07-10	169	495.723	86.512	44.6692	0.194172	0.174517	503.676	5.10512	110.471		1.87131	0.998733	0.00201936	2.24856e-07	8.97425	0.174976
n5635ox_41	2016-07-10	185	658.413	214.173	62.3298	0.32903	0.325287	507.556	5.31643	102.95		1.88377	1.01815	0.00201656	1.58034e-07	7.57323	0.155893
n5635ox_27	2016-07-10	137	151.316	109.769	17.503	0.690415	0.725433	555.932	5.82445	95.6105		1.99987	0.967329	0.00201181	3.02232e-07	5.19741	0.201157
n5635ox_1	2016-07-10	106	354.652	235.507	44.2708	0.616573	0.664052	607.171	6.20221	94.694		2.05477	0.987217	0.00201452	2.12044e-07	6.55159	0.17076
n5635ox_15	2016-07-10	124	237.302	199.142	32.9887	0.82935	0.839193	644.114	6.80176	98.0313		2.00526	1.00158	0.00201265	1.85833e-07	5.61899	0.16301
n5635ox_5	2016-07-10	108	268.557	122.45	33.8968	0.445096	0.455954	645.25	6.54269	99.6716		2.04326	0.98169	0.00201666	1.83365e-07	7.62209	0.162547
n5635ox_62	2016-07-10	168	288.441	36.7136	33.431	0.140455	0.127283	647.253	6.5191	108.757		1.85261	0.988751	0.00201938	1.6311e-07	8.98312	0.15733
n5635ox_32	2016-07-10	141	499.751	140.437	61.2043	0.280762	0.281014	652.228	6.69917	98.2619		2.05159	0.992349	0.00201699	2.4114e-07	7.79009	0.180088
n5635ox_69	2016-07-10	162	288.013	137.253	37.4542	0.464192	0.47655	657.031	6.63729	96.2831		1.85754	0.946827	0.00201509	2.88268e-07	6.83938	0.196227
n5635ox_34	2016-07-10	146	622.959	101.222	75.0636	0.168824	0.162486	664.139	6.55924	103.426		1.99756	1.00727	0.00202023	2.05868e-07	9.40458	0.169204
n5635ox_24	2016-07-10	133	233.031	142.003	31.5465	0.638939	0.609375	664.404	7.46427	104.786		2.01494	0.974618	0.00201615	2.70335e-07	7.36939	0.189925
n5635ox_18	2016-07-10	119	310.005	73.302	38.8663	0.24781	0.236454	672.338	7.08774	98.2268		2.03148	0.992036	0.00201944	1.39857e-07	9.01299	0.151754
n5635ox_58	2016-07-10	176	268.46	172.353	38.2417	0.650449	0.642004	689.08	6.94641	99.8932		1.85528	0.969047	0.0020143	2.89281e-07	6.4429	0.196555
n5635ox_3	2016-07-10	104	121.177	97.6883	25.0879	0.77213	0.80616	943.183	10.4066	97.2441		2.09571	1.00133	0.00202174	2.06551e-07	10.1628	0.169489
n5635ox_2	2016-07-10	107	174.403	28.8464	31.0855	0.157732	0.165401	949.215	9.64624	96.406		2.03882	0.979553	0.00202168	2.94945e-07	10.1317	0.19894
n5635ox_77	2016-07-10	154	273.85	64.1251	49.6777	0.235731	0.234162	949.713	9.63289	99.5745		1.90432	0.982491	0.0020204	1.51857e-07	9.49302	0.154608
n5635ox_43	2016-07-10	187	364.805	17.081	63.5966	0.0499775	0.0468222	958.939	9.67703	99.2779		1.89161	1.02238	0.00202191	1.99122e-07	10.2451	0.167307
n5635ox_29	2016-07-10	140	242.004	51.169	43.9299	0.19581	0.211439	959.51	9.60515	99.5452		2.09614	1.0139	0.00201944	2.44184e-07	9.01261	0.181211
n5635ox_7	2016-07-10	114	394.503	48.8419	70.8308	0.122319	0.123806	967.353	9.6945	99.5463		2.03385	0.993191	0.00202183	1.61018e-07	10.208	0.156943
n5635ox_31	2016-07-10	142	353.261	89.9245	65.755	0.256275	0.254555	967.779	10.0684	99.9003		2.03208	0.982911	0.00201888	2.56824e-07	8.73455	0.185412
n5635ox_11	2016-07-10	117	254.757	25.5503	45.5837	0.0989719	0.100293	974.094	9.74091	104.139		1.97667	0.965269	0.00202222	2.75396e-07	10.3988	0.191983
n5635ox_28	2016-07-10	138	243.297	30.043	43.9743	0.123721	0.123483	974.302	9.77543	101.012		2.13482	1.03261	0.00202228	1.64179e-07	10.4289	0.157768
n5635ox_73	2016-07-10	160	114.307	65.0481	23.1345	0.598928	0.569063	975.66	10.413	105.452		1.89228	0.964533	0.00201922	2.01193e-07	8.90368	0.167768
n5635ox_13	2016-07-10	116	156.639	42.5052	29.4907	0.269039	0.271358	978.928	10.2867	103.06		1.98754	0.970577	0.00202177	2.45177e-07	10.1778	0.181655
n5635ox_63	2016-07-10	170	392.296	29.5798	71.1444	0.0738676	0.0754018	990.767	9.82981	102.668		2.03613	1.0867	0.00202196	1.83176e-07	10.273	0.162789
n5635ox_72	2016-07-10	157	933.585	82.2739	171.355	0.0892886	0.0881268	999.4	9.9215	104.429		1.88251	0.97124	0.0020184	1.45067e-07	8.49109	0.152885
n5635ox_6	2016-07-10	110	183.802	116.967	42.458	0.6457	0.636377	1081.38	11.0669	101.629		2.01331	0.9673	0.00201979	2.21301e-07	9.18574	0.173885
n5635ox_40	2016-07-10	149	208.045	107.147	47.0472	0.536834	0.515015	1089.48	11.0796	103.392		1.94994	0.983255	0.00201367	1.99464e-07	6.13025	0.166962
n5635ox_47	2016-07-10	191	142.599	50.7181	33.15	0.357913	0.35567	1155.98	11.7975	100.859		1.82506	0.987627	0.00201651	2.54141e-07	7.547	0.184388
n5635ox_46	2016-07-10	195	112.618	57.8249	28.0551	0.524021	0.513462	1182.9	12.5524	99.7895		1.89217	1.02394	0.00201612	2.00754e-07	7.35413	0.167472
n5635ox_57	2016-07-10	177	101.706	40.0762	26.6338	0.402728	0.394042	1268.74	12.4716	99.4432		1.89196	0.988207	0.0020092	2.47186e-07	3.89332	0.181697
n5635ox_19	2016-07-10	121	1989.32	1180.71	655.525	0.602277	0.593525	1494.77	13.4866	103.126		1.99372	0.995819	0.00201343	1.87153e-07	6.00784	0.163422
			257.315	108.577	82.8803	0.423817	0.421962	1512.86	13.8618	100.514
n5635ox_4	2016-07-10	109	170.633	145.176	65.4506	0.849572	0.850813	1618.25	15.4543	101.064		1.99975	0.960783	0.00201627	1.79187e-07	7.42835	0.161381
n5635ox_16	2016-07-10	125	230.168	174.595	88.5318	0.761448	0.758552	1644.93	14.7859	99.997		2.12482	1.0613	0.00201175	2.45861e-07	5.16843	0.181383
n5635ox_50	2016-07-10	181	145.535	108.559	56.5865	0.769023	0.745932	1659.43	15.2501	100.521		1.84363	0.962962	0.00201842	2.00603e-07	8.50458	0.167552
n5635ox_49	2016-07-10	192	191.779	70.7875	71.1859	0.38229	0.36911	1717.16	16.1992	100.05		1.88117	1.01799	0.00200826	1.92869e-07	3.42452	0.164759
n5635ox_21	2016-07-10	130	764.651	124.091	277.819	0.156403	0.162285	1757.58	17.7106	96.0264		2.0492	0.99119	0.00201441	3.00826e-07	6.49912	0.200758
n5635ox_81	2016-07-10	152	101.402	74.9753	74.2666	0.761714	0.739383	2726.19	23.6547	101.093		1.91474	0.987866	0.00201302	2.14841e-07	5.80286	0.171535
n5635ox_70	2016-07-10	163	89.3078	29.0365	60.3677	0.335056	0.325129	2739.19	24.5736	101.19		1.83951	0.937635	0.00201185	1.83898e-07	5.22114	0.162428
Sample FR15-48 Hunt Fork Schist (Dhs): N 67020´32.48´´ W 150043´47.29´´
n5642ox_56	25/10/2016	196	316.076	155.01	34.468	0.502363	0.490421	557.108	5.04864	103.24		2.95505	0.994301	0.00201935	1.54676e-07	6.01927	0.148259
n5642ox_53	25/10/2016	202	363.316	311.081	44.4421	0.835789	0.856228	567.947	4.91892	96.6676		2.90717	0.981796	0.00201768	4.59135e-07	5.18613	0.259683
n5642ox_09	25/10/2016	262	252.232	149.317	31.0833	0.58639	0.591983	610.371	5.71064	100.147		2.94386	0.991437	0.00202643	1.17037e-07	9.54667	0.140019
n5642ox_49	25/10/2016	204	285.803	252.806	37.9929	0.865579	0.884546	613.002	5.74513	98.4253		2.93578	0.991457	0.00201789	1.16977e-07	5.29342	0.139518
n5642ox_71	25/10/2016	178	343.369	195.116	42.4406	0.558776	0.568241	613.103	5.41755	97.345		2.92392	0.98963	0.00201788	1.60737e-07	5.28554	0.149741
n5642ox_60	25/10/2016	190	303.711	41.2221	33.4819	0.136061	0.135728	615.227	5.36111	101.711		2.95019	0.994452	0.00202702	1.16935e-07	9.84214	0.140033
n5642ox_33	25/10/2016	227	319.03	117.588	37.5064	0.351351	0.368581	615.935	5.34974	97.5956		2.9055	0.990082	0.00202752	1.71071e-07	10.0908	0.153009
n5642ox_19	25/10/2016	246	360.106	238.362	45.9165	0.668594	0.661922	619.364	5.18253	100.928		2.94151	0.998506	0.00202702	2.13185e-07	9.8433	0.165354
n5642ox_04	25/10/2016	268	345.284	267.666	45.3882	0.767172	0.775206	620.319	5.37005	98.5592		2.89972	0.990572	0.00202623	1.501e-07	9.44587	0.147484
n5642ox_43	25/10/2016	214	274.735	129.686	33.4267	0.507921	0.47204	622.041	6.45781	108.629		2.9014	0.985998	0.00201858	1.24077e-07	5.63486	0.141041
n5642ox_70	25/10/2016	174	750.691	274.193	89.8003	0.374678	0.365254	626.059	5.24236	102.075		2.92287	0.977504	0.00202305	1.41786e-07	7.86462	0.145293
n5642ox_42	25/10/2016	218	169.099	174.1	24.9177	1.08701	1.02958	654.742	6.8641	104.756		2.93291	0.998424	0.00202181	2.1007e-07	7.24573	0.164127
n5642ox_63	25/10/2016	188	84.827	121.863	13.7705	1.51313	1.43661	659.661	6.52092	104.099		2.95176	0.994979	0.0020218	1.39524e-07	7.24059	0.14469
n5642ox_52	25/10/2016	203	847.85	685.207	119.884	0.812624	0.80817	661.496	5.64679	101.109		2.94522	0.994643	0.00202202	2.36001e-07	7.34812	0.172499
n5642ox_27	25/10/2016	230	419.428	173.181	54.05	0.405735	0.412897	662.348	5.50864	97.6165		2.89109	0.985173	0.00202261	2.398e-07	7.64418	0.173797
n5642ox_14	25/10/2016	254	668.293	502.231	94.2217	0.755003	0.751514	664.156	5.98563	98.2783		2.96423	0.995391	0.00201761	1.26893e-07	5.15497	0.141595
n5642ox_35	25/10/2016	223	128.324	117.503	18.9048	0.961224	0.915675	670.895	6.1235	104.268		2.95353	1.00544	0.00202092	1.37178e-07	6.80245	0.144094
n5642ox_62	25/10/2016	189	159.685	195.377	25.6763	1.1785	1.22352	679.321	6.46176	95.0568		2.95404	0.995748	0.00202207	1.94877e-07	7.3771	0.159513
n5642ox_17	25/10/2016	251	217.213	286.4	35.4845	1.37648	1.31852	683.581	6.31178	105.446		2.96141	0.994442	0.00202176	1.86163e-07	7.22196	0.156944
n5642ox_65	25/10/2016	187	127.435	203.154	22.3715	1.62017	1.59417	691.938	6.62616	102.005		2.94764	0.993592	0.00201964	2.02876e-07	6.16449	0.161802
n5642ox_31	25/10/2016	228	85.2979	46.6946	12.1204	0.540919	0.547429	707.624	7.16346	101.985		2.89793	0.987502	0.0020262	1.90975e-07	9.43068	0.158569
n5642ox_36	25/10/2016	222	473.687	256.501	68.0903	0.555896	0.541498	714.519	6.02039	103.38		2.95792	1.00694	0.00202456	1.16699e-07	8.61676	0.139844
n5642ox_61	25/10/2016	195	123.72	38.4575	22.1012	0.303339	0.310843	920.185	8.80282	98.6189		2.95739	0.995089	0.00202011	1.44706e-07	6.40046	0.145831
n5642ox_72	25/10/2016	179	1330.38	79.4315	228.683	0.0580513	0.059706	944.879	7.85937	99.2844		2.91916	0.98802	0.00202711	1.55032e-07	9.88445	0.148769
n5642ox_08	25/10/2016	261	397.697	52.5671	70.1671	0.123686	0.132179	953.281	8.01102	101.053		2.95527	0.995278	0.00202746	2.11921e-07	10.0598	0.16498
n5642ox_59	25/10/2016	193	370.828	37.9515	65.215	0.100576	0.102343	956.065	8.13507	101.231		2.95356	0.993798	0.00202773	1.99671e-07	10.1923	0.161231
n5642ox_32	25/10/2016	229	1093.84	107.094	193.676	0.0873509	0.0979062	965.551	7.98254	101.754		2.77637	0.946079	0.00202703	2.44935e-07	9.84718	0.175733
n5642ox_47	25/10/2016	210	244.987	62.6252	45.6408	0.260583	0.255626	968.251	8.45516	100.451		2.91709	0.991329	0.00202759	1.94179e-07	10.1261	0.159584
n5642ox_02	25/10/2016	270	221.242	23.9828	39.7139	0.109979	0.108401	972.853	8.32128	102.451		2.90037	0.990793	0.00202822	1.36844e-07	10.4406	0.144423
n5642ox_45	25/10/2016	211	396.429	41.2662	71.099	0.104651	0.104095	973.3	7.98295	102.4		2.92573	0.994267	0.00202834	1.97496e-07	10.4995	0.160609
n5642ox_06	25/10/2016	263	244.004	57.4545	45.421	0.22921	0.235465	973.482	8.71173	99.3769		2.93214	0.98749	0.00202553	1.67217e-07	9.09981	0.151863
n5642ox_28	25/10/2016	236	211.286	53.7946	39.7429	0.252086	0.254606	976.551	8.34194	98.7975		2.89401	0.998211	0.0020272	1.94381e-07	9.93308	0.159624
n5642ox_18	25/10/2016	247	388.253	38.7583	69.8744	0.0992783	0.0998275	977.971	8.13123	102.777		2.96351	1.00597	0.0020275	1.69239e-07	10.0777	0.152511
n5642ox_69	25/10/2016	177	213.552	57.3067	40.0757	0.252939	0.268351	981.359	9.14718	104.438		2.9186	0.987832	0.00202721	1.87385e-07	9.93503	0.157575
n5642ox_05	25/10/2016	264	431.915	102.678	81.4998	0.242071	0.237727	986.535	9.98186	102.602		2.92391	0.984718	0.00202637	1.44711e-07	9.51629	0.146176
n5642ox_38	25/10/2016	220	59.6654	26.5245	12.2764	0.414015	0.444555	1016.47	13.5187	97.1932		2.94825	1.00365	0.00202557	1.16918e-07	9.11821	0.139946
n5642ox_10	25/10/2016	259	464.717	80.6673	94.5302	0.199641	0.173584	1061.44	8.88677	99.0428		2.94238	0.990936	0.00202737	1.6183e-07	10.0158	0.150534
n5642ox_64	25/10/2016	185	269.828	129.254	61.3688	0.492675	0.479025	1106.24	9.61382	103.746		2.93911	0.990714	0.00202126	1.251e-07	6.969	0.141413
n5642ox_24	25/10/2016	239	279.418	79.9595	60.8298	0.289091	0.286164	1107.06	9.27408	100.69		2.91255	1.00461	0.0020255	2.02586e-07	9.08135	0.162003
n5642ox_11	25/10/2016	256	427.233	38.1744	88.7089	0.0874064	0.0893526	1111.91	9.3966	99.9584		2.97126	0.997751	0.00202794	1.6076e-07	10.3015	0.150285
n5642ox_20	25/10/2016	244	149.852	36.4775	33.7934	0.242293	0.243423	1157.71	10.1748	102.477		2.95682	1.0037	0.00202378	1.64476e-07	8.22611	0.15104
n5642ox_07	25/10/2016	260	180.094	69.4198	42.7065	0.395746	0.385465	1170.54	10.1973	102.687		2.96888	0.999861	0.00202663	2.11873e-07	9.64674	0.164924
n5642ox_34	25/10/2016	226	222.532	81.9021	55.6041	0.344928	0.368047	1218.74	18.3362	90.4505		2.91498	0.993312	0.00202785	1.24721e-07	10.2546	0.141705
n5642ox_26	25/10/2016	238	213.121	95.0537	60.4462	0.482484	0.446007	1323.96	11.1639	93.1344		2.89724	0.999326	0.00201808	1.42764e-07	5.3859	0.145252
n5642ox_16	25/10/2016	248	271.658	43.6152	70.5159	0.149182	0.160552	1324.97	15.2185	93.1054		2.96357	1.00599	0.00202724	1.47499e-07	9.94991	0.1469
n5642ox_57	25/10/2016	194	631.909	115.783	165.684	0.178885	0.183227	1325.8	16.1072	92.2677		2.95313	0.993655	0.00202041	1.41366e-07	6.54649	0.145048
n5642ox_40	25/10/2016	215	56.0802	11.5808	15.2849	0.197073	0.206504	1372.17	12.6944	97.5402		2.91468	0.990511	0.00201978	1.17405e-07	6.23189	0.139713
n5642ox_13	25/10/2016	253	107.634	54.5906	31.6816	0.503089	0.507185	1373.84	12.3734	98.81		2.97285	0.998285	0.00202332	1.9888e-07	7.99949	0.160773
n5642ox_12	25/10/2016	255	110.995	41.4863	31.8365	0.359841	0.373768	1385.39	11.4699	98.9989		2.97512	0.999046	0.002022	1.65728e-07	7.34166	0.151278
n5642ox_66	25/10/2016	182	69.5303	36.0244	21.5792	0.513857	0.51811	1440.91	12.9375	101.46		2.92058	0.988502	0.00201965	2.10781e-07	6.16872	0.164243
n5642ox_15	25/10/2016	252	265.401	93.1984	81.5453	0.347932	0.35116	1476.52	11.4688	100.681		2.95342	0.991759	0.00202081	1.45523e-07	6.74587	0.146067
n5642ox_41	25/10/2016	219	214.691	94.6643	67.8367	0.426811	0.440932	1483.03	13.3706	98.4743		2.94172	1.00143	0.00201926	1.97087e-07	5.97499	0.160032
n5642ox_68	25/10/2016	186	92.4803	32.8536	28.7102	0.347966	0.35525	1488.41	15.3965	100.056		2.94115	0.991404	0.00201812	1.34515e-07	5.40721	0.143326
n5642ox_50	25/10/2016	205	134.23	32.7128	41.0373	0.238566	0.243706	1502.46	12.6602	99.3699		2.90698	0.981732	0.0020222	3.8005e-07	7.43895	0.226618
n5642ox_23	25/10/2016	240	498.779	216.138	162.73	0.440018	0.433334	1526.56	11.6456	101.489		2.92678	1.00951	0.00202119	1.29064e-07	6.9365	0.142273
n5642ox_46	25/10/2016	212	201.293	158.977	76.0043	0.78355	0.78978	1606.84	13.1172	98.2647		2.9182	0.991707	0.00201858	1.528e-07	5.63393	0.147743
n5642ox_73	25/10/2016	180	136.006	71.6658	48.3347	0.529263	0.52693	1608.04	14.5545	99.7819		2.92581	0.990271	0.00201833	1.73371e-07	5.51243	0.153157
n5642ox_22	25/10/2016	245	102.586	115.993	41.3463	1.06177	1.13069	1609.64	14.6403	97.2841		2.96013	1.00483	0.00201887	2.12339e-07	5.78327	0.164693
n5642ox_21	25/10/2016	243	112.731	90.4319	43.198	0.808	0.80219	1627.6	13.4846	100.582		2.9493	1.00115	0.00202626	1.48634e-07	9.46033	0.147124
n5642ox_25	25/10/2016	237	417.42	480.18	172.777	1.15442	1.15035	1633.24	12.1489	100.443		2.8885	0.996311	0.00201816	1.70254e-07	5.42636	0.152295
n5642ox_01	25/10/2016	269	127.099	80.7633	47.5336	0.639432	0.635438	1643.59	12.921	99.9277		2.89336	0.988397	0.00202485	2.61269e-07	8.75927	0.181271
n5642ox_67	25/10/2016	181	105.738	67.8658	39.604	0.63691	0.64183	1645.54	13.8037	99.6329		2.91879	0.987896	0.00201855	1.5539e-07	5.62312	0.148398
n5642ox_44	25/10/2016	213	51.3358	32.3976	19.58	0.634561	0.631093	1691.59	17.237	106.446		2.91257	0.989792	0.00201873	2.20128e-07	5.70988	0.167156
n5642ox_51	25/10/2016	206	474.679	509.477	213.488	1.08363	1.07331	1780.55	13.2296	102.073		2.9298	0.989439	0.00202169	2.3493e-07	7.18668	0.172127
n5642ox_29	25/10/2016	235	137.821	58.6049	56.5823	0.418399	0.425223	1849.87	14.8013	99.4056		2.8837	0.994655	0.0020201	1.91535e-07	6.39402	0.158425
n5642ox_48	25/10/2016	207	285.788	224.64	131.974	0.785141	0.786039	1905.62	15.0313	99.923		2.91582	0.984716	0.00201936	1.29358e-07	6.02619	0.142235
n5642ox_30	25/10/2016	231	313.125	536.614	258.048	1.69346	1.71374	2586.13	19.2429	96.4707		2.895	0.986503	0.00202049	1.82704e-07	6.58851	0.155886
n5642ox_55	25/10/2016	197	55.6233	37.5437	40.653	0.654125	0.674963	2750.06	24.7472	99.3072		2.95337	0.993735	0.00202043	2.07358e-07	6.55873	0.163217
n5642ox_03	25/10/2016	271	46.0113	55.24	37.4786	1.21266	1.20057	2766.8	22.7043	100.764		2.87961	0.983701	0.00202024	1.38961e-07	6.46389	0.144472
The assigned SIMS U-Pb age is the 207 corrected age data with the exception of zircons with >1200 Ma that use the 206Pb/238U age. Zircon standard 91500 yielded a δ18 value of 9.86 [± 0.16] ‰ (1SD, n=55) on 7-Oct-2016 run and 9.86 [± 0.13] ‰ (1SD, n=41) on 25-Oct-2015. Standard values outside this range are rejected and not used in any calculations. Values highlighted in yellow have >10% discordan…
91500 and Temora Zircon Standards (Mt. 1457)
9500ox_mt1457_20161007@1	2016-07-10	1										2.23931		0.00202106	1.60365e-07	9.8227	0.156735
9500ox_mt1457_20161007@02	2016-07-10	2										2.4153		0.00202116	1.54136e-07	9.86929	0.155203
9500ox_mt1457_20161007@03	2016-07-10	3										2.36624		0.00202099	1.90217e-07	9.78447	0.164701
9500ox_mt1457_20161007@04	2016-07-10	10										2.15527		0.00202089	2.53642e-07	9.73638	0.184435
9500ox_mt1457_20161007@05	2016-07-10	11										2.20342		0.00202122	1.37692e-07	9.90039	0.151375
9500ox_mt1457_20161007@06	2016-07-10	19										2.19079		0.00202093	2.41833e-07	9.75799	0.180512
9500ox_mt1457_20161007@07	2016-07-10	26										2.13359		0.00202114	1.96369e-07	9.86329	0.166467
9500ox_mt1457_20161007@08	2016-07-10	27										2.12388		0.00202086	2.1005e-07	9.72051	0.170492
9500ox_mt1457_20161007@09	2016-07-10	34	Rejected Standard									2.12374		0.00202021	1.36914e-07	9.39611	0.151141
9500ox_mt1457_20161007@10	2016-07-10	35										2.10204		0.00202092	2.77201e-07	9.75299	0.192557
9500ox_mt1457_20161007@11	2016-07-10	42										2.15372		0.00202111	2.06337e-07	9.8443	0.169391
9500ox_mt1457_20161007@12	2016-07-10	50										2.14291		0.00202078	2.73725e-07	9.68191	0.191329
9500ox_mt1457_20161007@13	2016-07-10	51										2.15096		0.00202108	1.36095e-07	9.82943	0.151012
9500ox_mt1457_20161007@14	2016-07-10	58										2.08709		0.00202144	2.18443e-07	10.0117	0.173084
9500ox_mt1457_20161007@15	2016-07-10	65										2.06691		0.00202123	1.38752e-07	9.90662	0.151612
9500ox_mt1457_20161007@16	2016-07-10	66										2.08469		0.00202139	1.78668e-07	9.98519	0.161526
9500ox_mt1457_20161007@17	2016-07-10	74										2.12908		0.00202096	1.53801e-07	9.76984	0.15511
9500ox_mt1457_20161007@18	2016-07-10	81										2.07626		0.00202111	1.91048e-07	9.84666	0.164943
9500ox_mt1457_20161007@19	2016-07-10	82										2.08097		0.0020211	2.25681e-07	9.84329	0.175326
9500ox_mt1457_20161007@20	2016-07-10	89										2.09653		0.00202091	2.19535e-07	9.74823	0.173395
9500ox_mt1457_20161007@21	2016-07-10	96										2.10521		0.00202144	2.29113e-07	10.0099	0.176429
9500ox_mt1457_20161007@22	2016-07-10	97										2.09292		0.00202131	1.60305e-07	9.94809	0.156734
9500ox_mt1457_20161007@23	2016-07-10	105										2.08137		0.00202149	2.96685e-07	10.034	0.199564
9500ox_mt1457_20161007@24	2016-07-10	112										2.03212		0.00202138	1.46648e-07	9.98093	0.153429
9500ox_mt1457_20161007@25	2016-07-10	113										2.04779		0.00202139	1.39393e-07	9.98755	0.151765
9500ox_mt1457_20161007@26	2016-07-10	120										2.0021		0.00202139	2.51959e-07	9.98443	0.183893
9500ox_mt1457_20161007@27	2016-07-10	127										2.10806		0.00202138	1.96849e-07	9.97981	0.166619
9500ox_mt1457_20161007@28	2016-07-10	128										2.06741		0.00202126	1.38739e-07	9.92147	0.151611
9500ox_mt1457_20161007@29	2016-07-10	135	Rejected Standard									1.98962		0.00202201	1.77402e-07	10.2951	0.161219
9500ox_mt1457_20161007@30	2016-07-10	143										1.98616		0.00202117	3.2874e-07	9.87638	0.211489
9500ox_mt1457_20161007@31	2016-07-10	144										1.98315		0.00202143	2.10883e-07	10.0079	0.170773
9500ox_mt1457_20161007@32	2016-07-10	151										1.93825		0.00202108	3.04468e-07	9.8334	0.202395
9500ox_mt1457_20161007@33	2016-07-10	158										1.92244		0.00202125	1.43715e-07	9.91672	0.152741
9500ox_mt1457_20161007@34	2016-07-10	159										1.96186		0.00202137	1.94983e-07	9.9783	0.166081
9500ox_mt1457_20161007@35	2016-07-10	166										1.87369		0.00202096	1.99868e-07	9.77082	0.167474
9500ox_mt1457_20161007@36	2016-07-10	173										1.94271		0.00202066	1.6492e-07	9.6208	0.157864
9500ox_mt1457_20161007@37	2016-07-10	174										1.91454		0.00202166	1.85428e-07	10.1231	0.163396
9500ox_mt1457_20161007@38	2016-07-10	182										1.8502		0.00202102	1.7454e-07	9.7993	0.160396
9500ox_mt1457_20161007@39	2016-07-10	189										1.86777		0.00202128	1.85562e-07	9.93308	0.163412
9500ox_mt1457_20161007@40	2016-07-10	190										1.84792		0.00202074	2.97783e-07	9.66089	0.19993
9500ox_mt1457_20161007@41	2016-07-10	197										1.82293		0.00202119	1.98514e-07	9.88661	0.167091
9500ox_mt1457_20161007@42	2016-07-10	204										1.86348		0.00202151	2.37447e-07	10.0479	0.17911
9500ox_mt1457_20161007@43	2016-07-10	205										1.85755		0.00202132	1.52633e-07	9.95106	0.154848
9500ox_mt1457_20161007@44	2016-07-10	213										1.83634		0.0020209	1.88203e-07	9.7432	0.164129
9500ox_mt1457_20161007@45	2016-07-10	220										1.83301		0.00202086	2.94959e-07	9.72259	0.198908
9500ox_mt1457_20161007@46	2016-07-10	221										1.82458		0.00202037	1.79124e-07	9.47839	0.161593
9500ox_mt1457_20161007@47	2016-07-10	228										1.88005		0.00202103	1.87278e-07	9.80603	0.163876
9500ox_mt1457_20161007@48	2016-07-10	235										1.83974		0.00202128	2.8321e-07	9.92932	0.194702
9500ox_mt1457_20161007@49	2016-07-10	236										1.93522		0.00202103	1.83526e-07	9.80703	0.162834
9500ox_mt1457_20161007@50	2016-07-10	243										1.809		0.00202149	2.67198e-07	10.0342	0.189091
9500ox_mt1457_20161007@51	2016-07-10	250										1.83034		0.00202068	1.47126e-07	9.6294	0.1535
9500ox_mt1457_20161007@52	2016-07-10	251										1.82041		0.0020213	1.63751e-07	9.93931	0.157603
9500ox_mt1457_20161007@53	2016-07-10	258										1.79512		0.00202175	1.92417e-07	10.1665	0.165367
9500ox_mt1457_20161007@54	2016-07-10	265										1.89637		0.00202104	2.78459e-07	9.81014	0.193006
9500ox_mt1457_20161007@55	2016-07-10	266										1.83937		0.00202133	2.21798e-07	9.95417	0.17412
9500ox_mt1457_20161007@56	2016-07-10	267										1.79097		0.0020207	1.89493e-07	9.64401	0.164481
9500ox_mt1457_20161007@59	2016-07-10	268										1.78402		0.00202083	1.60101e-07	9.70809	0.156655
Tem_ox_1	2016-07-10	12										2.22548	1.01001	0.0020173	1.34223e-07	7.94139	0.150375
Tem_ox_2	2016-07-10	43										2.15416	1.00021	0.00201727	2.18168e-07	7.92927	0.172782
Tem_ox_3	2016-07-10	67										2.10385	1.00919	0.00201755	2.26905e-07	8.06666	0.175529
Tem_ox_4	2016-07-10	98										2.11046	1.00838	0.00201744	2.04471e-07	8.01257	0.16864
Tem_ox_5	2016-07-10	136										1.99775	0.966307	0.00201832	1.42681e-07	8.4525	0.15233
Tem_ox_6	2016-07-10	175										1.91013	0.997694	0.00201738	2.80611e-07	7.9817	0.193597
Tem_ox_7	2016-07-10	206										1.87078	1.00712	0.00201768	2.14847e-07	8.13496	0.171782
Tem_ox_8	2016-07-10	264										1.92555	1.07266	0.00201744	1.76703e-07	8.01478	0.160775
91500 and Temora Zircon Standards (Mt. 1479)
915ox_mt1479_20161025@1	25/10/2016	1										3.0596		0.00202695	2.43846e-07	9.80652	0.17536
915ox_mt1479_20161025@2	25/10/2016	2										3.05333		0.00202719	1.50021e-07	9.92644	0.147517
915ox_mt1479_20161025@3	25/10/2016	3										3.04236		0.00202745	1.15201e-07	10.0568	0.139707
915ox_mt1479_20161025@4	25/10/2016	4										3.03719		0.00202694	1.70636e-07	9.79912	0.15286
915ox_mt1479_20161025@5	25/10/2016	11										3.03307		0.00202723	2.13945e-07	9.94415	0.165603
915ox_mt1479_20161025@6	25/10/2016	12										3.00927		0.00202712	1.17588e-07	9.88971	0.140171
915ox_mt1479_20161025@7	25/10/2016	19										3.03643		0.00202655	1.30693e-07	9.60936	0.142936
915ox_mt1479_20161025@8	25/10/2016	20										3.03682		0.00202659	1.46341e-07	9.62617	0.146582
915ox_mt1479_20161025@9	25/10/2016	27										3.02684		0.00202703	1.62263e-07	9.84404	0.150629
915ox_mt1479_20161025@10	25/10/2016	28										3.02535		0.00202712	1.21441e-07	9.89324	0.140969
915ox_mt1479_20161025@11	25/10/2016	35										3.06364		0.00202757	1.18469e-07	10.1156	0.140377
915ox_mt1479_20161025@12	25/10/2016	36										3.07921		0.00202724	1.39323e-07	9.94908	0.144944
915ox_mt1479_20161025@13	25/10/2016	44										3.10032		0.00202671	1.82524e-07	9.68853	0.156155
915ox_mt1479_20161025@14	25/10/2016	45										3.10765		0.00202723	1.20952e-07	9.94696	0.140873
915ox_mt1479_20161025@15	25/10/2016	52										3.10921		0.00202728	2.11777e-07	9.97244	0.164926
915ox_mt1479_20161025@16	25/10/2016	53										3.11609		0.00202674	1.13838e-07	9.70328	0.139394
915ox_mt1479_20161025@17	25/10/2016	60										3.12828		0.00202669	1.7457e-07	9.67784	0.153924
915ox_mt1479_20161025@18	25/10/2016	61										3.13732		0.0020273	1.13469e-07	9.9781	0.139353
915ox_mt1479_20161025@19	25/10/2016	68										3.14227		0.00202741	1.13379e-07	10.0352	0.139342
915ox_mt1479_20161025@20	25/10/2016	69										3.13172		0.00202695	1.19206e-07	9.8079	0.140494
915ox_mt1479_20161025@21	25/10/2016	76										3.14065		0.00202708	1.134e-07	9.87286	0.139327
915ox_mt1479_20161025@22	25/10/2016	77										3.13468		0.00202707	1.13505e-07	9.86768	0.139347
915ox_mt1479_20161025@23	25/10/2016	85										3.0998		0.0020272	2.07559e-07	9.92975	0.163612
915ox_mt1479_20161025@24	25/10/2016	86										3.10414		0.00202735	1.242e-07	10.0062	0.141565
915ox_mt1479_20161025@25	25/10/2016	93										3.05559		0.00202698	1.64954e-07	9.82118	0.151336
915ox_mt1479_20161025@26	25/10/2016	94										3.05367		0.00202692	1.3863e-07	9.79253	0.144765
915ox_mt1479_20161025@27	25/10/2016	101										3.04165		0.00202718	2.15861e-07	9.91959	0.166205
915ox_mt1479_20161025@28	25/10/2016	102										3.03421		0.00202662	2.10428e-07	9.6423	0.164473
915ox_mt1479_20161025@29	25/10/2016	109										2.9937		0.00202673	1.78827e-07	9.69435	0.155111
915ox_mt1479_20161025@30	25/10/2016	110										2.99297		0.00202682	1.27884e-07	9.74134	0.142331
915ox_mt1479_20161025@31	25/10/2016	117										2.98858		0.00202699	1.16203e-07	9.82397	0.139882
915ox_mt1479_20161025@32	25/10/2016	118										2.98794		0.00202716	2.07736e-07	9.91226	0.163664
915ox_mt1479_20161025@33	25/10/2016	125										3.01232		0.00202711	1.15743e-07	9.88546	0.139796
915ox_mt1479_20161025@34	25/10/2016	126										3.02359		0.00202723	1.42867e-07	9.94679	0.145781
915ox_mt1479_20161025@35	25/10/2016	134										3.04972		0.00202666	2.24192e-07	9.66156	0.168843
915ox_mt1479_20161025@36	25/10/2016	135										3.04948		0.00202724	1.36158e-07	9.953	0.144211
915ox_mt1479_20161025@37	25/10/2016	142										3.06394		0.00202716	1.68044e-07	9.91192	0.152171
915ox_mt1479_20161025@38	25/10/2016	143										3.05354		0.00202683	1.57918e-07	9.74696	0.149491
915ox_mt1479_20161025@39	25/10/2016	150										3.0493		0.00202717	1.41736e-07	9.91468	0.145509
915ox_mt1479_20161025@40	25/10/2016	151										3.03891		0.00202671	1.15237e-07	9.68838	0.139672
915ox_mt1479_20161025@41	25/10/2016	158										3.02607		0.00202699	1.57605e-07	9.82674	0.149419
915ox_mt1479_20161025@42	25/10/2016	159										3.02065		0.00202665	1.31763e-07	9.65567	0.14318
915ox_mt1479_20161025@43	25/10/2016	166										2.99339		0.00202724	1.93824e-07	9.95097	0.159461
915ox_mt1479_20161025@44	25/10/2016	167										2.99014		0.00202742	1.53596e-07	10.0384	0.148422
915ox_mt1479_20161025@45	25/10/2016	175										2.95683		0.0020271	1.26565e-07	9.87945	0.14206
915ox_mt1479_20161025@46	25/10/2016	176										2.95455		0.00202742	1.41379e-07	10.0415	0.145438
915ox_mt1479_20161025@47	25/10/2016	183										2.96496		0.00202766	1.61094e-07	10.1583	0.150357
915ox_mt1479_20161025@48	25/10/2016	184										2.96665		0.0020275	1.65235e-07	10.0791	0.151439
915ox_mt1479_20161025@49	25/10/2016	191										2.97274		0.00202708	1.16493e-07	9.86853	0.139946
915ox_mt1479_20161025@50	25/10/2016	192										2.97199		0.00202694	2.17922e-07	9.79926	0.166846
915ox_mt1479_20161025@51	25/10/2016	199										2.96229		0.00202687	1.59528e-07	9.76588	0.149908
915ox_mt1479_20161025@52	25/10/2016	200										2.96108		0.0020266	1.69018e-07	9.63274	0.152404
915ox_mt1479_20161025@53	25/10/2016	208										2.94088		0.00202707	1.17107e-07	9.86752	0.14007
915ox_mt1479_20161025@54	25/10/2016	209										2.9426		0.00202707	2.00339e-07	9.86381	0.1614
915ox_mt1479_20161025@55	25/10/2016	216										2.93324		0.00202738	1.17268e-07	10.0183	0.140121
915ox_mt1479_20161025@56	25/10/2016	217										2.93754		0.00202724	1.99636e-07	9.95223	0.161196
915ox_mt1479_20161025@57	25/10/2016	224										2.94955		0.00202717	2.04357e-07	9.91721	0.162626
915ox_mt1479_20161025@58	25/10/2016	225										2.9346		0.00202722	1.46987e-07	9.93871	0.146774
915ox_mt1479_20161025@59	25/10/2016	232										2.90065		0.00202726	1.17903e-07	9.96023	0.140243
915ox_mt1479_20161025@60	25/10/2016	233										2.89919		0.00202744	1.27089e-07	10.0489	0.142193
915ox_mt1479_20161025@61	25/10/2016	241										2.94435		0.00202678	1.63884e-07	9.72272	0.151043
915ox_mt1479_20161025@62	25/10/2016	242										2.94591		0.00202628	1.28666e-07	9.47097	0.142472
915ox_mt1479_20161025@63	25/10/2016	249										2.9741		0.00202674	1.88595e-07	9.70104	0.157902
915ox_mt1479_20161025@64	25/10/2016	250										2.97796		0.00202691	2.10709e-07	9.78495	0.164574
915ox_mt1479_20161025@65	25/10/2016	257										2.97842		0.00202713	1.35333e-07	9.89462	0.144015
915ox_mt1479_20161025@66	25/10/2016	258										2.96929		0.00202715	1.16553e-07	9.90467	0.139962
915ox_mt1479_20161025@67	25/10/2016	265										2.92722		0.00202722	1.74007e-07	9.94123	0.153797
915ox_mt1479_20161025@68	25/10/2016	266										2.92732		0.00202744	1.5706e-07	10.0493	0.149303
915ox_mt1479_20161025@69	25/10/2016	274										2.88042		0.00202676	1.62075e-07	9.71213	0.150566
915ox_mt1479_20161025@70	25/10/2016	275	Rejected Standard									0.111842		0.00194319	3.21866e-06	-31.9208	1.59255
915ox_mt1479_20161025@71	25/10/2016	282										2.88686		0.00202688	1.23494e-07	9.76897	0.141388
915ox_mt1479_20161025@72	25/10/2016	283										2.89239		0.00202671	1.88353e-07	9.68645	0.15783
915ox_mt1479_20161025@73	25/10/2016	290										2.91077		0.0020274	2.13045e-07	10.029	0.165328
915ox_mt1479_20161025@74	25/10/2016	291										2.90657		0.00202695	2.26522e-07	9.8063	0.169611
915ox_mt1479_20161025@75	25/10/2016	299										2.89657		0.00202708	1.33844e-07	9.8732	0.143674
915ox_mt1479_20161025@76	25/10/2016	300										2.8907		0.00202711	1.83932e-07	9.88752	0.156577
915ox_mt1479_20161025@77	25/10/2016	307										2.85319		0.00202721	1.54244e-07	9.93594	0.148575
915ox_mt1479_20161025@78	25/10/2016	308										2.84862		0.00202683	1.57322e-07	9.74585	0.149338
915ox_mt1479_20161025@79	25/10/2016	315										2.82833		0.00202679	2.14485e-07	9.72744	0.165751
915ox_mt1479_20161025@80	25/10/2016	316										2.82399		0.0020273	1.24226e-07	9.98158	0.141568
915ox_mt1479_20161025@81	25/10/2016	324										2.8256		0.00202683	1.34679e-07	9.74827	0.143849
915ox_mt1479_20161025@82	25/10/2016	325										2.83456		0.00202719	1.94392e-07	9.9275	0.159626
915ox_mt1479_20161025@83	25/10/2016	332										2.86841		0.00202724	1.29184e-07	9.95257	0.142641
915ox_mt1479_20161025@84	25/10/2016	333										2.88656		0.00202724	1.46273e-07	9.9508	0.146601
915ox_mt1479_20161025@85	25/10/2016	341										2.88383		0.00202705	2.33942e-07	9.85719	0.17205
915ox_mt1479_20161025@86	25/10/2016	342										2.88396		0.00202678	1.71058e-07	9.72022	0.152966
915ox_mt1479_20161025@87	25/10/2016	349										2.83605		0.0020269	1.76477e-07	9.78264	0.154464
915ox_mt1479_20161025@88	25/10/2016	350										2.84016		0.00202706	1.50434e-07	9.85972	0.147613
915ox_mt1479_20161025@89	25/10/2016	358										2.81834		0.00202734	1.21397e-07	10.0003	0.140972
915ox_mt1479_20161025@90	25/10/2016	359										2.82761		0.00202701	1.49101e-07	9.83557	0.14728
915ox_mt1479_20161025@91	25/10/2016	366										2.88052		0.00202701	1.75329e-07	9.83508	0.15415
915ox_mt1479_20161025@92	25/10/2016	367										2.88326		0.00202691	1.98775e-07	9.78673	0.160921
915ox_mt1479_20161025@93	25/10/2016	377										2.9024		0.00202722	1.23356e-07	9.9392	0.141378
915ox_mt1479_20161025@94	25/10/2016	378										2.90545		0.00202713	1.17815e-07	9.89358	0.140218
Temox_01	25/10/2016	37										3.06213	0.994453	0.00202248	1.81777e-07	7.57707	0.155724
Temox_02	25/10/2016	78										3.13598	1.00041	0.00202378	1.32041e-07	8.22794	0.143082
Temox_03	25/10/2016	127										3.03195	1.00276	0.00202333	2.12519e-07	8.0049	0.164966
Temox_04	25/10/2016	168										2.98659	0.998814	0.00202357	1.42792e-07	8.12306	0.145562
Temox_05	25/10/2016	201										2.94619	0.994972	0.00202289	3.64361e-07	7.78533	0.220283
Temox_06	25/10/2016	234										2.88456	0.994951	0.00202301	1.18104e-07	7.84233	0.140041
Temox_07	25/10/2016	267										2.90281	0.991626	0.00202309	1.68812e-07	7.88511	0.152163
Temox_08	25/10/2016	292										2.90323	0.998851	0.00202344	1.70109e-07	8.05917	0.152533
Temox_09	25/10/2016	317										2.80939	0.994831	0.00202249	1.68894e-07	7.58484	0.152154
Temox_10	25/10/2016	334										2.87996	0.997716	0.0020232	1.53946e-07	7.93632	0.148282
Temox_11	25/10/2016	351										2.8277	0.995614	0.00202304	2.293e-07	7.85833	0.170333
Temox_12	25/10/2016	368										2.85952	0.991767	0.00202276	1.62381e-07	7.7192	0.150433
